# Supplementary material for: Improvement of catalytic activity of aluminum complexes for the ring-opening polymerization of ε-caprolactone: aluminum thioamidate and thioureidate systems
Source: Royal Society of Chemistry journal article supplement (doi:10.1039/d3dt03198e), 2023-01-01
Supplement: d3dt03198e2.pdf [file d3dt03198e2.pdf]

## Improvement of Catalytic Activity of Aluminum Complexes for the Ring-Opening Polymerization of $\epsilon$ -Caprolactone: Aluminum Thioamidate and Thioureidate Systems

Prasanna Kumar Ganta,<sup>a‡</sup> Malleamadugula Ravi Teja,<sup>a‡</sup> Chun-Juei Chang,<sup>ab‡</sup> Anandan Sambandam,<sup>c</sup> Rajiv Kamaraj,<sup>a</sup> Yu-Ting Chu,<sup>ad</sup> Shangwu Ding,<sup>ad</sup> Hsing-Yin Chen,<sup>a</sup> Hsuan-Ying Chen,<sup>\*adef</sup>

<sup>a</sup> Department of Medicinal and Applied Chemistry, Drug Development and Value Creation Research Center, Kaohsiung Medical University, Kaohsiung, Taiwan, 80708, R.O.C.

<sup>b</sup> Department of International Ph.D Program for Science, National Sun Yat-sen University, Kaohsiung, Taiwan 80424, R.O.C.

<sup>c</sup> Nanomaterials and Solar Energy Conversion Lab, Department of Chemistry, National Institute of Technology, Tiruchirappalli, 620015, India

<sup>d</sup> Department of Chemistry, National Sun Yat-Sen University, Kaohsiung, Taiwan, 80424, R.O.C.

<sup>e</sup> Department of Medical Research, Kaohsiung Medical University Hospital, Kaohsiung 80708, Taiwan, R.O.C.

<sup>f</sup> National Pingtung University of Science and Technology, Pingtung 91201, Taiwan

Supporting Information

Table of Contents

|                                                                                                                                                                                     |    |
|-------------------------------------------------------------------------------------------------------------------------------------------------------------------------------------|----|
| <b>Table S1.</b> <sup>1</sup> H and <sup>13</sup> C NMR peaks (in CDCl <sub>3</sub> ) of two methyl groups on Al atoms and carbonyl groups of ligands.....                          | 4  |
| <b>Table S2.</b> Kinetic study of CL polymerization with various Al complexes bearing amidates <sup>a</sup> .....                                                                   | 5  |
| <b>Table S3.</b> Kinetic study of CL polymerization with various Al complexes bearing thioamidates <sup>a</sup> .....                                                               | 7  |
| <b>Table S4.</b> Kinetic study of CL polymerization with various Al complexes bearing ureas and thioureas <sup>a</sup> .....                                                        | 9  |
| <b>Table S5.</b> Kinetic study of CL polymerization with various concentration of O <sup>Pr</sup> -Al and BnOH in toluene 5 mL, [CL] = 2.0 M at room temperature <sup>a</sup> ..... | 11 |
| <b>Table S6.</b> Kinetic study of CL polymerization with various concentration of S <sup>Pr</sup> -Al and BnOH in toluene 5 mL, [CL] = 2.0 M at room temperature <sup>a</sup> ..... | 13 |
| <b>Table S7.</b> Cartesian coordinate of CL.....                                                                                                                                    | 33 |
| <b>Table S8.</b> Cartesian coordinate of [S <sup>Pr</sup> AlOMe <sub>2</sub> ] <sub>2</sub> .....                                                                                   | 33 |
| <b>Table S9.</b> Cartesian coordinate of [S <sup>Pr</sup> AlOMe <sub>2</sub> ] <sub>2</sub> in state 1b.....                                                                        | 36 |
| <b>Table S10.</b> Cartesian coordinate of S <sup>Pr</sup> AlOMe <sub>2</sub> .....                                                                                                  | 39 |
| <b>Table S11.</b> Cartesian coordinate of S <sup>Pr</sup> AlOMe <sub>2</sub> in state 1a.....                                                                                       | 41 |
| <b>Table S12.</b> Cartesian coordinate of S <sup>Pr</sup> AlOMe <sub>2</sub> in state TS1a.....                                                                                     | 43 |

|                                                                                        |    |
|----------------------------------------------------------------------------------------|----|
| <b>Table S13.</b> Cartesian coordinate of $S^{Pr}AlOMe_2$ in state 2a.....             | 44 |
| <b>Table S14.</b> Cartesian coordinate of $S^{Pr}AlOMe_2$ in state TS2a.....           | 47 |
| <b>Table S15.</b> Cartesian coordinate of $S^{Pr}AlOMe_2$ in state 3a.....             | 48 |
| <b>Table S16.</b> Cartesian coordinate of $S^{Pr}AlOMe_2$ in state TS3a.....           | 49 |
| <b>Table S17.</b> Cartesian coordinate of $S^{Pr}AlOMe_2$ in state 4a.....             | 51 |
| <b>Table S18.</b> Cartesian coordinate of $[O^{Pr}AlOMe_2]_2$ .....                    | 53 |
| <b>Table S19.</b> Cartesian coordinate of $[O^{Pr}AlOMe_2]_2$ in state 1c.....         | 55 |
| <b>Table S20.</b> Cartesian coordinate of $[O^{Pr}AlOMe_2]_2$ in state TS1c .....      | 55 |
| <b>Table S21.</b> Cartesian coordinate of $[O^{Pr}AlOMe_2]_2$ in state 2c.....         | 59 |
| <b>Table S22.</b> Cartesian coordinate of $[O^{Pr}AlOMe_2]_2$ in state TS2c .....      | 64 |
| <b>Table S23.</b> Cartesian coordinate of $[O^{Pr}AlOMe_2]_2$ in state 3c.....         | 67 |
| <b>Table S24.</b> Cartesian coordinate of $[O^{Pr}AlOMe_2]_2$ in state TS3c .....      | 70 |
| <b>Table S25.</b> Cartesian coordinate of $[O^{Pr}AlOMe_2]_2$ in state 4c.....         | 72 |
| <b>Table S26.</b> Cartesian coordinate of $[O^{Pr}AlOMe_2]_2$ in state $TS_{rb}$ ..... | 75 |
| <b>Table S27.</b> Cartesian coordinate of $[O^{Pr}AlOMe_2]_2$ in state 1d.....         | 78 |
| <b>Table S28.</b> Cartesian coordinate of $[O^{Pr}AlOMe_2]_2$ in state TS1d.....       | 81 |

|                                                                                                                                                                                                                                                  |       |
|--------------------------------------------------------------------------------------------------------------------------------------------------------------------------------------------------------------------------------------------------|-------|
| <b>Figure S1.</b> First-order kinetic plots of CL polymerization with various concentrations of various Al complexes bearing amide with 4 eq. BnOH plotted against time with [CL] = 2.0 M in toluene 5 mL ( <b>Table S1</b> ). .....             | 6     |
| <b>Figure S2.</b> First-order kinetic plots of CL polymerization with various concentrations of various Al complexes bearing thioamide with 4 eq. BnOH plotted against time with [CL] = 2.0 M in toluene 5 mL ( <b>Table S2</b> ) .....          | 10    |
| <b>Figure S3.</b> First-order kinetic plots of CL polymerization with various concentrations of various Al complexes bearing urea and thiourea with 4 eq. BnOH plotted against time with [CL] = 2.0 M in toluene 5 mL ( <b>Table S3</b> ). ..... | 10    |
| <b>Figure S4.</b> First-order kinetic plots of CL polymerization with various concentrations of [O <sup>Pr</sup> -Al·4BnOH] plotted against time with [CL] = 2.0 M in toluene 5 mL .....                                                         | 12    |
| <b>Figure S5.</b> First-order kinetic plots of CL polymerization with various concentrations of [S <sup>Pr</sup> -Al·4BnOH] plotted against time with [CL] = 2.0 M in toluene 5 mL .....                                                         | 14    |
| <b>Figure S6-S39.</b> <sup>1</sup> H NMR and <sup>13</sup> C NMR spectrum of Al complexes in CDCl <sub>3</sub> .....                                                                                                                             | 15-30 |
| <b>Figure S40.</b> The <sup>1</sup> H NMR spectra of (a) BnOH; (B) US <sup>OMe</sup> -H; (C) US <sup>OMe</sup> -Al; and (D) the alcoholysis reactions of US <sup>OMe</sup> -Al with 6 eq. BnOH.....                                              | 30    |
| <b>Figure S41.</b> The <sup>1</sup> H NMR spectra of (a) S <sup>OMe</sup> -H; (b) S <sup>OMe</sup> -Al; (c) S <sup>OMe</sup> -Al + 4 BnOH; and (d) S <sup>OMe</sup> -Al + 2 BnOH; (e) S <sup>OMe</sup> -Al + BnOH.....                           | 31    |
| <b>Figure S42.</b> DOSY spectrum of of (a) BnOH; (b) S <sup>OMe</sup> -H; (c) S <sup>OMe</sup> -Al and (d) the mixture of S <sup>OMe</sup> -Al with 4 BnOH in CDCl <sub>3</sub> .....                                                            | 32    |

**Table S1.**  $^1\text{H}$  and  $^{13}\text{C}$  NMR peaks (in  $\text{CDCl}_3$ ) of two methyl groups on Al atoms and carbonyl groups of ligands

| L-Al                               | $^1\text{H}$ NMR for<br>( $\text{CH}_3$ ) $_2$ Al | $^{13}\text{C}$ NMR for<br>( $\text{CH}_3$ ) $_2$ Al | $^{13}\text{C}$ NMR for<br>OC or SC |
|------------------------------------|---------------------------------------------------|------------------------------------------------------|-------------------------------------|
|                                    | ppm                                               |                                                      |                                     |
| <b>O<sup>H</sup></b>               | -0.65                                             | -10.32                                               | 174.84                              |
| <b>O<sup>Cl</sup></b>              | -0.92                                             | -10.29                                               | 175.30                              |
| <b>O<sup>Me</sup></b>              | -0.98                                             | -9.89                                                | 174.17                              |
| <b>O<sup>Pr</sup></b>              | -1.14                                             | -8.98                                                | 155.76                              |
| <b>O<sup>OMe</sup></b>             | -0.92                                             | -10.39                                               | 174.73                              |
| <b>S<sup>H</sup></b>               | -0.48                                             | -10.06                                               | 195.74                              |
| <b>S<sup>Cl</sup></b>              | -0.48                                             | -10.01                                               | 196.67                              |
| <b>S<sup>Me</sup></b>              | -0.44                                             | -8.51                                                | 195.59                              |
| <b>S<sup>Pr</sup></b>              | -0.49                                             | -8.89                                                | 196.28                              |
| <b>S<sup>OMe</sup></b>             | -0.43                                             | -10.04                                               | 196.20                              |
| <b>U<sup>H</sup></b>               | -0.88                                             | -9.54                                                | 164.05                              |
| <b>U<sup>Cl</sup></b>              | -0.89                                             | -9.54                                                | 164.16                              |
| <b>U<sup>OMe</sup></b>             | -0.91                                             | -9.67                                                | 163.92                              |
| <b>U<sup>S<sup>H</sup></sup></b>   | -0.63                                             | -9.61                                                | 173.77                              |
| <b>U<sup>S<sup>Cl</sup></sup></b>  | -0.65                                             | -9.75                                                | 175.12                              |
| <b>U<sup>S<sup>OMe</sup></sup></b> | -0.64                                             | -9.63                                                | 174.27                              |



**Table S2.** Kinetic study of CL polymerization with various Al complexes bearing amidates<sup>a</sup>

|                                                           | [CL]:[O <sup>X</sup> -Al]:[BnOH] = 100:0.5:2 |          |           |           |           |
|-----------------------------------------------------------|----------------------------------------------|----------|-----------|-----------|-----------|
|                                                           | X =                                          |          |           |           |           |
| Time/min                                                  | H                                            | OMe      | Pr        | Cl        | Me        |
|                                                           | PCL conversion <sup>b</sup>                  |          |           |           |           |
| 5                                                         | 0.10                                         |          |           |           | 0.26      |
| 10                                                        | 0.30                                         | 0.25     | 0.32      | 0.07      | 0.49      |
| 15                                                        |                                              |          |           |           | 0.60      |
| 20                                                        | 0.62                                         | 0.48     | 0.56      | 0.37      | 0.74      |
| 25                                                        |                                              |          |           |           | 0.78      |
| 30                                                        | 0.78                                         | 0.62     | 0.72      | 0.56      | 0.85      |
| 35                                                        |                                              |          |           |           | 0.88      |
| 40                                                        | 0.86                                         | 0.74     | 0.82      | 0.72      | 0.90      |
| 44                                                        | 0.90                                         |          |           |           |           |
| 50                                                        |                                              | 0.82     | 0.90      | 0.82      |           |
| 60                                                        |                                              | 0.88     |           | 0.90      |           |
| 65                                                        |                                              | 0.90     |           |           |           |
|                                                           |                                              |          |           |           |           |
| $k_{\text{obs}} \times 10^3 / \text{min}^{-1}$<br>(error) | 55.3 (13)                                    | 36.7 (5) | 47.3 (17) | 43.9 (18) | 57.9 (23) |
| I.P/ min<br>(error)                                       | 3 (1)                                        | 3 (1)    | 3 (1)     | 10(2)     | 0         |
| R <sup>2</sup>                                            | 0.999                                        | 0.999    | 0.998     | 0.997     | 0.995     |

<sup>a</sup> In general, the reaction was carried out in toluene with [CL] = 2.0 M at 25°C.

<sup>b</sup> The data were determined from <sup>1</sup>H NMR analysis.

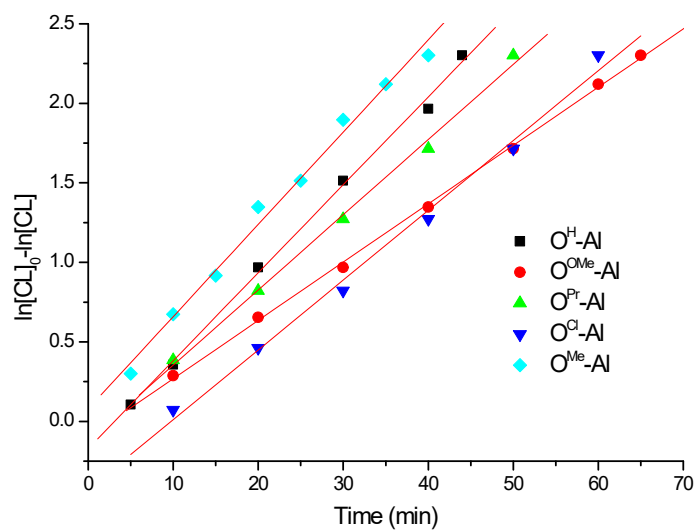

**Figure S1.** First-order kinetic plots of CL polymerization with various concentrations of various Al complexes bearing amide with 4 eq. BnOH plotted against time with  $[CL] = 2.0$  M in toluene 5 mL (Table S1).

**Table S3.** Kinetic study of CL polymerization with various Al complexes bearing thioamidates<sup>a</sup>

|                                                                      | [CL]:[S <sup>X</sup> -Al]:[BnOH] = 100:0.5:2 |           |            |          |            |
|----------------------------------------------------------------------|----------------------------------------------|-----------|------------|----------|------------|
|                                                                      | X =                                          |           |            |          |            |
| Time/min                                                             | H                                            | OMe       | Pr         | Cl       | Me         |
|                                                                      | PCL conversion <sup>b</sup>                  |           |            |          |            |
| 2                                                                    |                                              |           | 0.08       |          |            |
| 3                                                                    | 0.15                                         |           |            | 0.10     | 0.13       |
| 4                                                                    |                                              | 0.10      | 0.38       |          |            |
| 5                                                                    |                                              |           |            |          | 0.26       |
| 6                                                                    | 0.37                                         | 0.20      |            | 0.26     |            |
| 7                                                                    |                                              |           | 0.53       |          |            |
| 8                                                                    |                                              | 0.30      |            |          |            |
| 9                                                                    | 0.54                                         |           |            | 0.43     |            |
| 10                                                                   |                                              | 0.40      | 0.71       |          | 0.57       |
| 12                                                                   | 0.66                                         | 0.50      | 0.80       | 0.52     |            |
| 14                                                                   |                                              |           | 0.86       |          |            |
| 15                                                                   |                                              | 0.63      |            | 0.61     | 0.78       |
| 16                                                                   | 0.78                                         |           | 0.90       |          |            |
| 20                                                                   | 0.84                                         | 0.80      |            | 0.73     | 0.90       |
| 24                                                                   | 0.92                                         |           |            |          |            |
| 25                                                                   |                                              |           |            | 0.80     |            |
| 28                                                                   |                                              | 0.90      |            |          |            |
| 35                                                                   |                                              |           |            | 0.90     |            |
|                                                                      |                                              |           |            |          |            |
| k <sub>obs</sub> × 10 <sup>3</sup> /<br>min <sup>-1</sup><br>(error) | 108.2 (46)                                   | 95.1 (34) | 155.6 (59) | 68.5 (8) | 127.1 (70) |
| I.P/ min<br>(error)                                                  | 2 (1)                                        | 4 (1)     | 2 (1)      | 1 (1)    | 3 (1)      |
| R <sup>2</sup>                                                       | 0.996                                        | 0.996     | 0.996      | 0.999    | 0.995      |

<sup>a</sup> In general, the reaction was carried out in toluene with [CL] = 2.0 M at 25°C.

<sup>b</sup> The data were determined from <sup>1</sup>H NMR analysis.



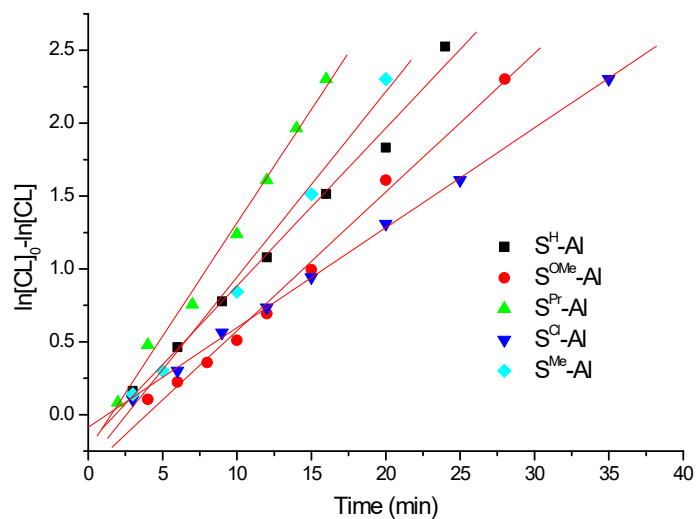

**Figure S2.** First-order kinetic plots of CL polymerization with various concentrations of various Al complexes bearing thioamide with 4 eq. BnOH plotted against time with  $[CL] = 2.0$  M in toluene 5 mL (Table S2).

**Table S4.** Kinetic study of CL polymerization with various Al complexes bearing ureas and thioureas<sup>a</sup>

| Time                                                      | [CL]:[Al]:[BnOH]            |                     |                      |                      |                    |                     |
|-----------------------------------------------------------|-----------------------------|---------------------|----------------------|----------------------|--------------------|---------------------|
| min                                                       | US <sup>OMe</sup> -Al       | US <sup>H</sup> -Al | US <sup>Cl</sup> -Al | U <sup>OMe</sup> -Al | U <sup>H</sup> -Al | U <sup>Cl</sup> -Al |
|                                                           | PCL conversion <sup>b</sup> |                     |                      |                      |                    |                     |
| 3                                                         |                             | 0.23                | 0.20                 | 0.17                 | 0.05               | 0.09                |
| 4                                                         | 0.10                        | 0.48                |                      |                      |                    |                     |
| 5                                                         |                             |                     |                      |                      |                    |                     |
| 6                                                         | 0.34                        |                     | 0.47                 | 0.44                 | 0.15               | 0.21                |
| 8                                                         | 0.58                        |                     |                      |                      |                    |                     |
| 9                                                         |                             | 0.67                | 0.70                 | 0.64                 |                    | 0.34                |
| 10                                                        | 0.74                        |                     |                      |                      | 0.28               |                     |
| 12                                                        | 0.82                        | 0.81                | 0.83                 | 0.72                 |                    | 0.43                |
| 14                                                        | 0.90                        |                     |                      |                      |                    |                     |
| 15                                                        |                             | 0.90                | 0.90                 | 0.84                 |                    | 0.50                |
| 20                                                        |                             |                     |                      | 0.90                 | 0.50               |                     |
| 25                                                        |                             |                     |                      |                      |                    | 0.68                |
| 30                                                        |                             |                     |                      |                      | 0.64               |                     |
| 35                                                        |                             |                     |                      |                      |                    | 0.80                |
| 40                                                        |                             |                     |                      |                      | 0.76               | 0.85                |
| 50                                                        |                             |                     |                      |                      | 0.85               |                     |
| $k_{\text{obs}} \times 10^3 / \text{min}^{-1}$<br>(error) | 219.4 (87)                  | 155.5 (152)         | 176.5 (55)           | 126.2 (55)           | 38.3 (8)           | 47.6 (6)            |
| I.P/ min<br>(error)                                       | 4 (1)                       | 1 (1)               | 2 (1)                | 1 (1)                | 2 (1)              | 1 (1)               |
| R <sup>2</sup>                                            | 0.997                       | 0.986               | 0.999                | 0.996                | 0.999              | 0.999               |

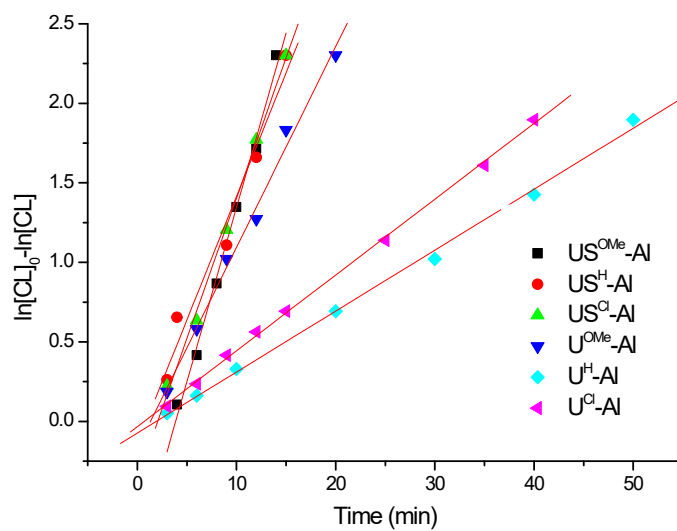

**Figure S3.** First-order kinetic plots of CL polymerization with various concentrations of various Al complexes bearing urea and thiourea with 4 eq. BnOH plotted against time with  $[CL] = 2.0$  M in toluene 5 mL (**Table S3**).

**Table S5.** Kinetic study of CL polymerization with various concentration of **O<sup>Pr</sup>-Al** and BnOH in toluene 5 mL, [CL] = 2.0 M at room temperature<sup>a</sup>

|      | [CL]:[O <sup>Pr</sup> -Al]:[BnOH] |           |         |         |
|------|-----------------------------------|-----------|---------|---------|
| time | 100:0.25:1                        | 100:0.5:2 | 100:1:4 | 100:2:8 |
| min  | PCL conversion <sup>b</sup>       |           |         |         |
| 1    |                                   |           |         | 0.16    |
| 2    |                                   |           | 0.17    | 0.47    |
| 3    |                                   |           |         | 0.65    |
| 4    |                                   |           |         | 0.75    |
| 5    |                                   |           | 0.38    | 0.83    |
| 6    |                                   |           |         | 0.88    |
| 7    |                                   |           |         | 0.90    |
| 8    |                                   |           | 0.57    |         |
| 10   |                                   | 0.32      | 0.66    |         |
| 13   |                                   |           | 0.74    |         |
| 15   |                                   |           | 0.80    |         |
| 18   |                                   |           | 0.86    |         |
| 20   |                                   | 0.56      | 0.90    |         |
| 30   |                                   | 0.72      |         |         |
| 40   |                                   | 0.82      |         |         |
| 50   |                                   | 0.90      |         |         |
| 60   | 0.15                              |           |         |         |
| 120  | 0.22                              |           |         |         |
| 180  | 0.32                              |           |         |         |

|                                                           |          |           |            |             |
|-----------------------------------------------------------|----------|-----------|------------|-------------|
| 240                                                       | 0.40     |           |            |             |
| 300                                                       | 0.48     |           |            |             |
| 360                                                       | 0.52     |           |            |             |
| 540                                                       | 0.70     |           |            |             |
| 930                                                       | 0.90     |           |            |             |
| $k_{\text{obs}} \times 10^2 / \text{min}^{-1}$<br>(error) | 2.47 (9) | 4.72 (31) | 11.52 (30) | 35.99 (162) |
| I.P/ min (error)                                          | 28(15)   | 2(1)      | 1(1)       | 1(1)        |
| $R^2$                                                     | 0.996    | 0.998     | 0.998      | 0.995       |

<sup>a</sup> In general, the reaction was carried out in toluene with  $[\text{CL}] = 2.0 \text{ M}$  at  $25^\circ\text{C}$ .

<sup>b</sup> The data were determined from  $^1\text{H}$  NMR analysis.

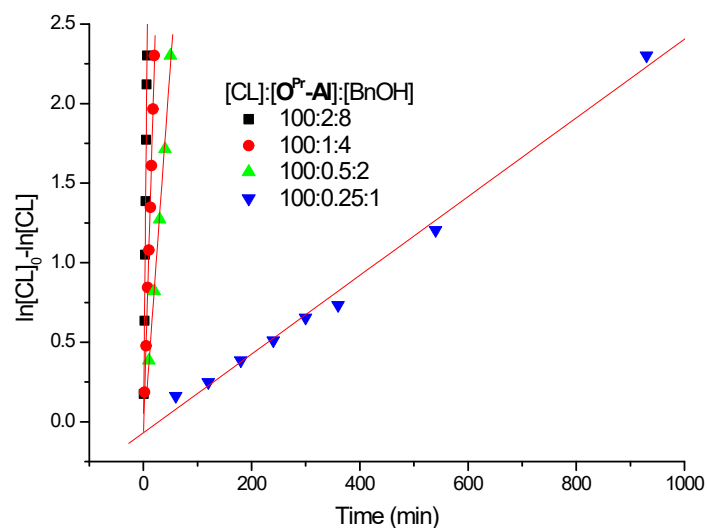

**Figure S4.** First-order kinetic plots of CL polymerization with various concentrations of  $[\text{O}^{\text{Pr}}\text{-Al}\cdot 4\text{BnOH}]$  plotted against time with  $[\text{CL}] = 2.0 \text{ M}$  in toluene 5 mL

**Table S6.** Kinetic study of CL polymerization with various concentration of **S<sup>Pr</sup>-Al** and BnOH in toluene 5 mL, [CL] = 2.0 M at room temperature<sup>a</sup>

|      | [CL]:[S <sup>Pr</sup> -Al]:[BnOH] |           |         |         |
|------|-----------------------------------|-----------|---------|---------|
| time | 100:0.25:1                        | 100:0.5:2 | 100:1:4 | 100:2:8 |
| min  | PCL conversion <sup>b</sup>       |           |         |         |
| 1    |                                   |           |         | 0.23    |
| 2    |                                   | 0.08      | 0.19    | 0.50    |
| 3    |                                   |           | 0.36    | 0.70    |
| 4    |                                   | 0.38      | 0.48    | 0.80    |
| 5    |                                   |           | 0.63    | 0.90    |
| 6    |                                   |           | 0.73    |         |
| 7    |                                   | 0.53      | 0.80    |         |
| 8    |                                   |           | 0.84    |         |
| 9    |                                   |           | 0.88    |         |
| 10   |                                   | 0.71      | 0.91    |         |
| 12   |                                   | 0.80      |         |         |
| 14   |                                   | 0.86      |         |         |
| 16   |                                   | 0.90      |         |         |
| 30   | 0.26                              |           |         |         |
| 60   | 0.51                              |           |         |         |
| 90   | 0.68                              |           |         |         |
| 120  | 0.79                              |           |         |         |
| 150  | 0.86                              |           |         |         |
| 180  | 0.90                              |           |         |         |
|      |                                   |           |         |         |

|                                                           |          |            |            |             |
|-----------------------------------------------------------|----------|------------|------------|-------------|
| $k_{\text{obs}} \times 10^2 / \text{min}^{-1}$<br>(error) | 1.35 (2) | 15.56 (59) | 27.97 (49) | 49.99 (268) |
| I.P/ min (error)                                          | 7(2)     | 2(1)       | 2(1)       | 1(1)        |
| $R^2$                                                     | 0.999    | 0.996      | 0.999      | 0.996       |

<sup>a</sup> In general, the reaction was carried out in toluene with  $[\text{CL}] = 2.0 \text{ M}$  at  $25^\circ\text{C}$ .

<sup>b</sup> The data were determined from  $^1\text{H}$  NMR analysis.

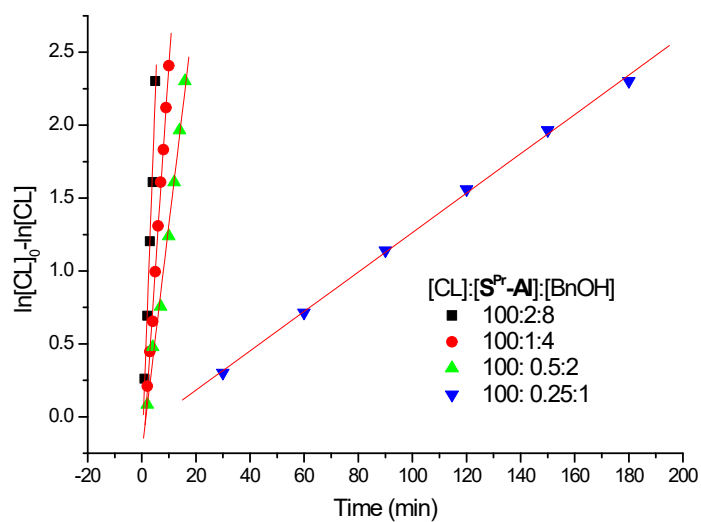

**Figure S5.** First-order kinetic plots of CL polymerization with various concentrations of  $[\text{S}^{\text{Pr}}\text{-Al}\cdot 4\text{BnOH}]$  plotted against time with  $[\text{CL}] = 2.0 \text{ M}$  in toluene 5 mL

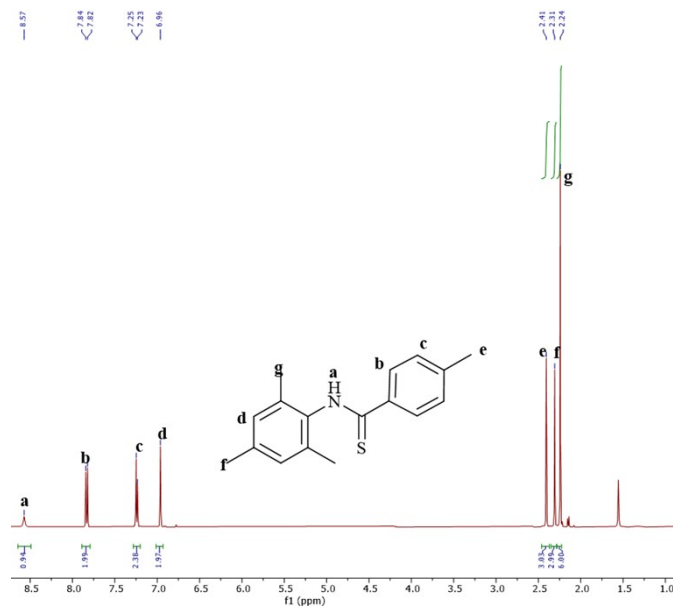

Figure S6.  $^1\text{H}$  NMR spectrum of S<sup>Me</sup>-H in  $\text{CDCl}_3$

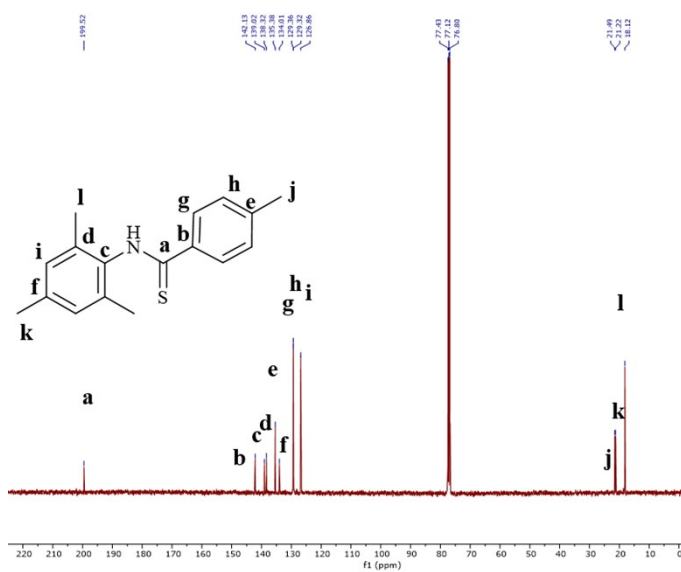

Figure S7.  $^{13}\text{C}$  NMR spectrum of S<sup>Me</sup>-H in  $\text{CDCl}_3$



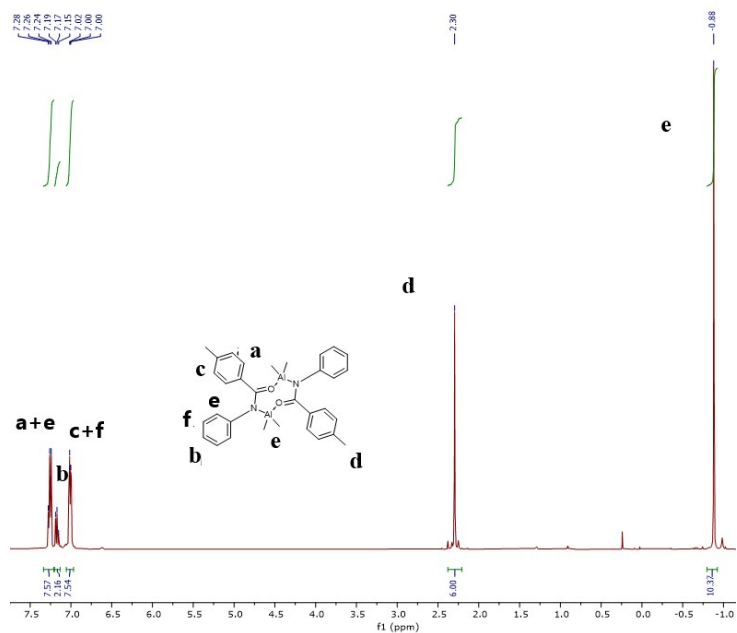

Figure S8.  $^1\text{H}$  NMR spectrum of  $\text{O}^{\text{H}}\text{-Al}$  in  $\text{CDCl}_3$

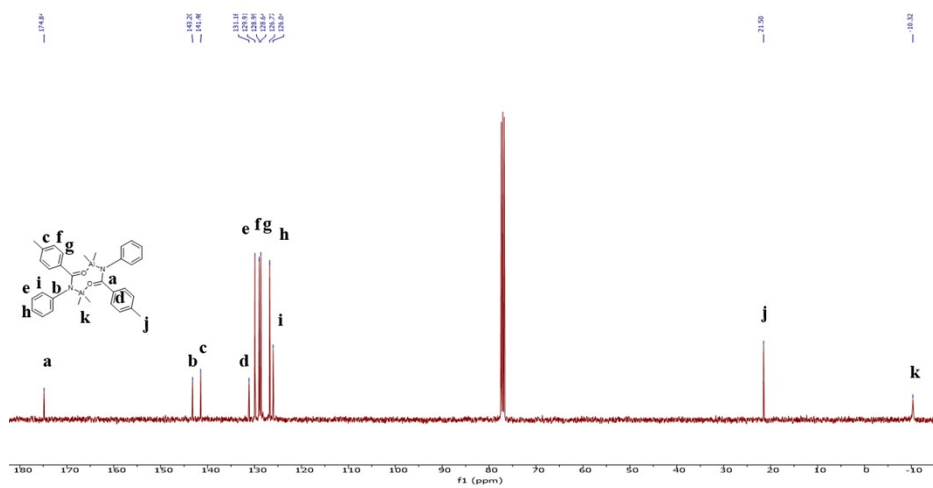

Figure S11.  $^{13}\text{C}$  NMR spectrum of  $\text{O}^{\text{H}}\text{-Al}$  in  $\text{CDCl}_3$

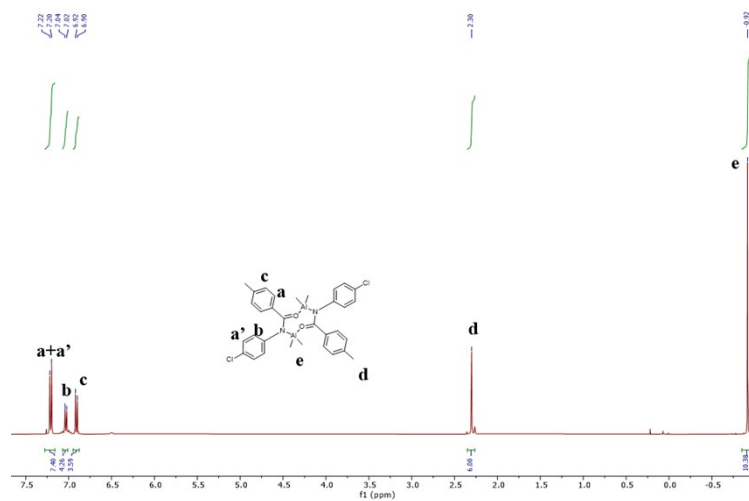

Figure S12. <sup>1</sup>H NMR spectrum of OCl-Al in CDCl<sub>3</sub>

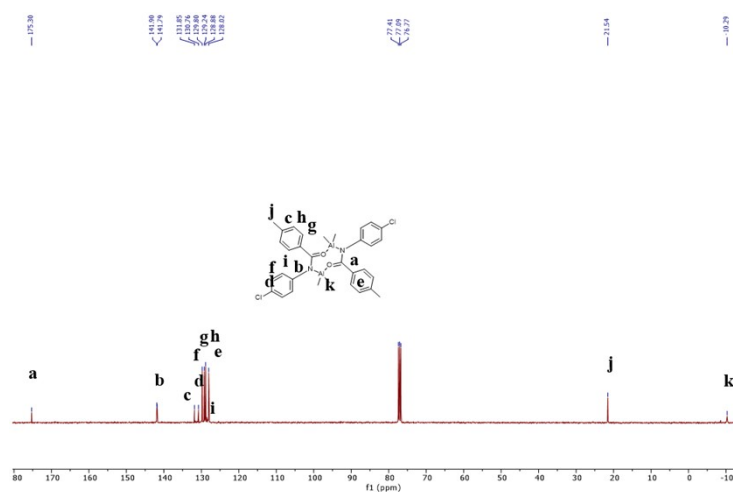

Figure S13. <sup>13</sup>C NMR spectrum of OCl-Al in CDCl<sub>3</sub>

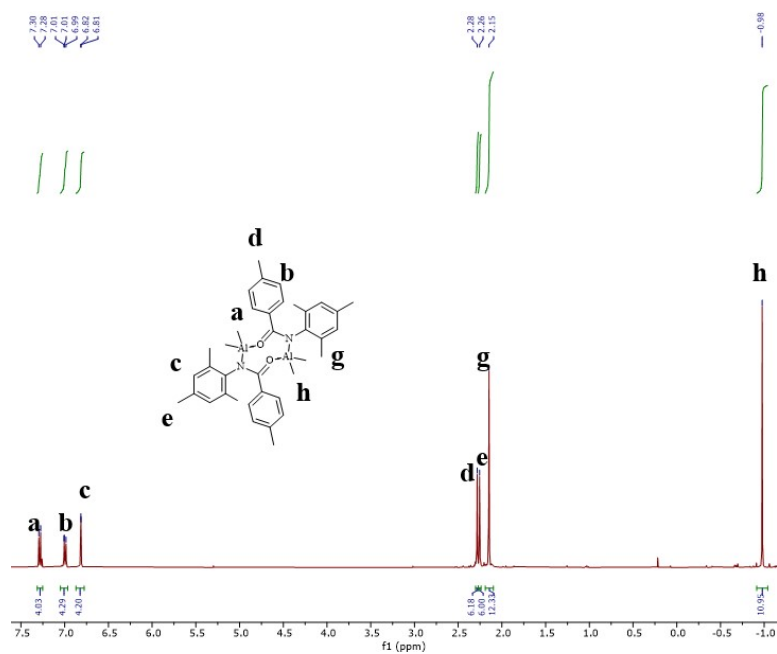

Figure S14. <sup>1</sup>H NMR spectrum of **O<sup>Me</sup>-Al** in CDCl<sub>3</sub>

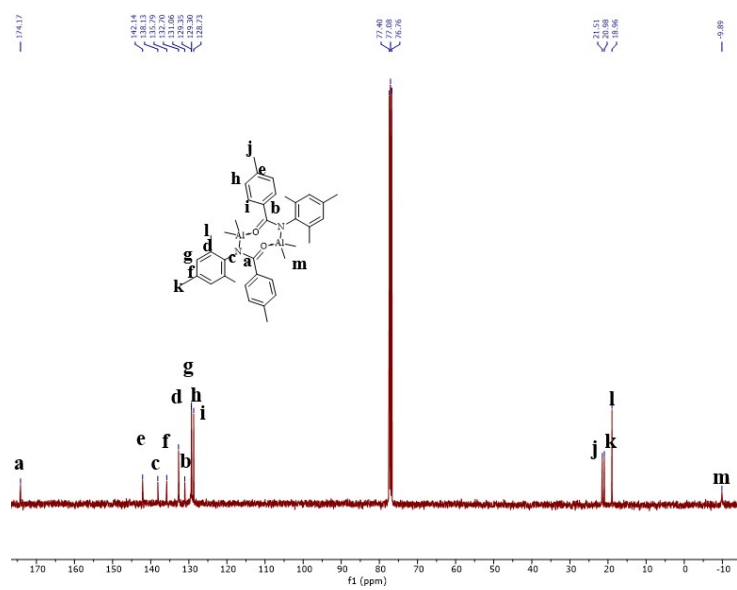

Figure S1. <sup>13</sup>C NMR spectrum of **O<sup>Me</sup>-Al** in CDCl<sub>3</sub>

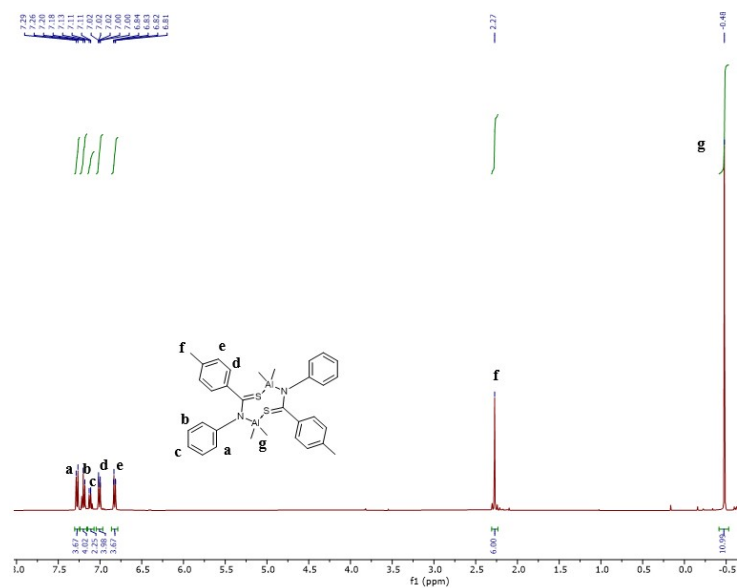

Figure S16.  $^1\text{H}$  NMR spectrum of  $S^H\text{-Al}$  in  $\text{CDCl}_3$

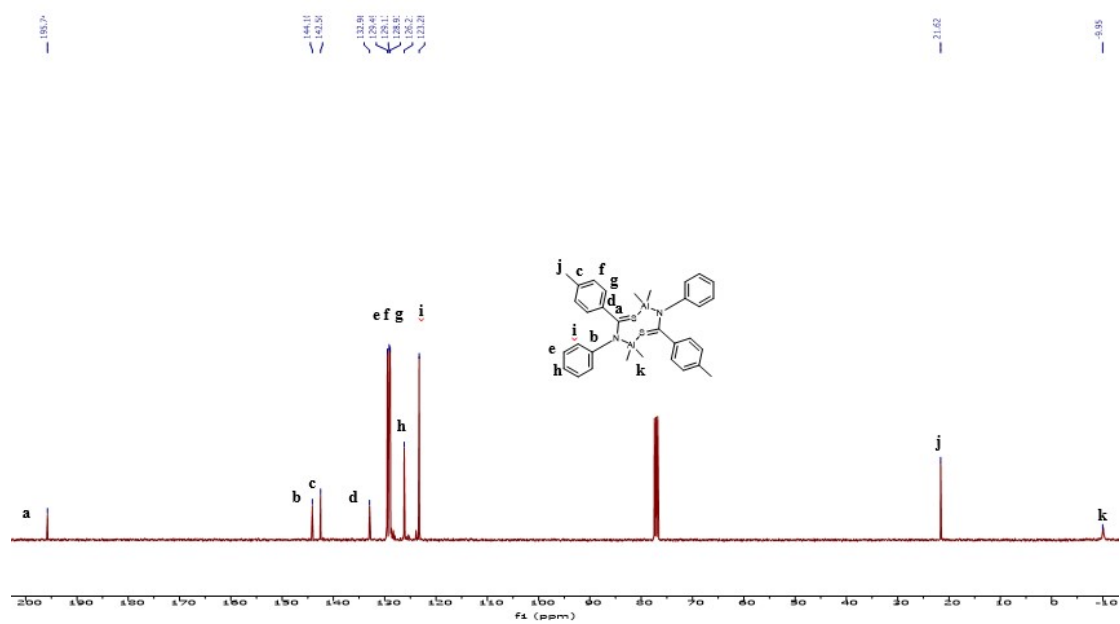

Figure S17.  $^{13}\text{C}$  NMR spectrum of  $S^H\text{-Al}$  in  $\text{CDCl}_3$

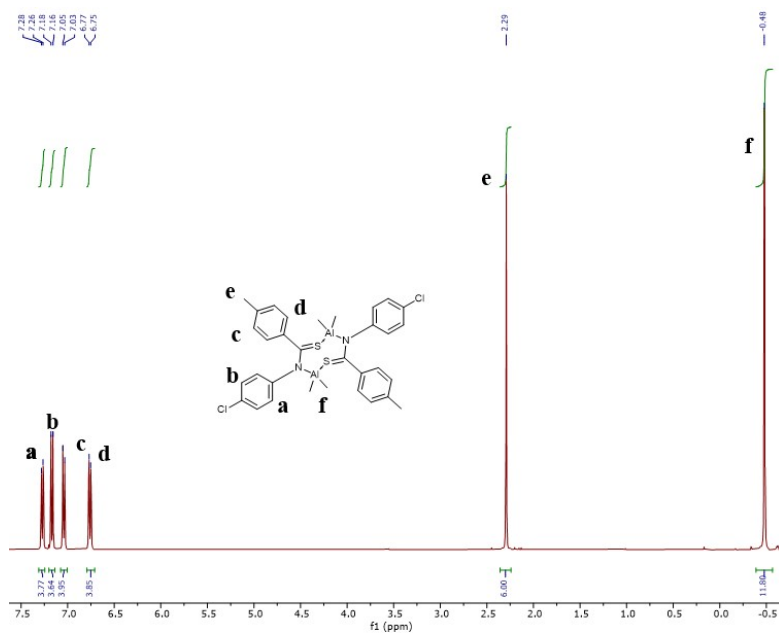

Figure S18.  $^1\text{H}$  NMR spectrum of  $\text{S}^{\text{Cl}}\text{-Al}$  in  $\text{CDCl}_3$

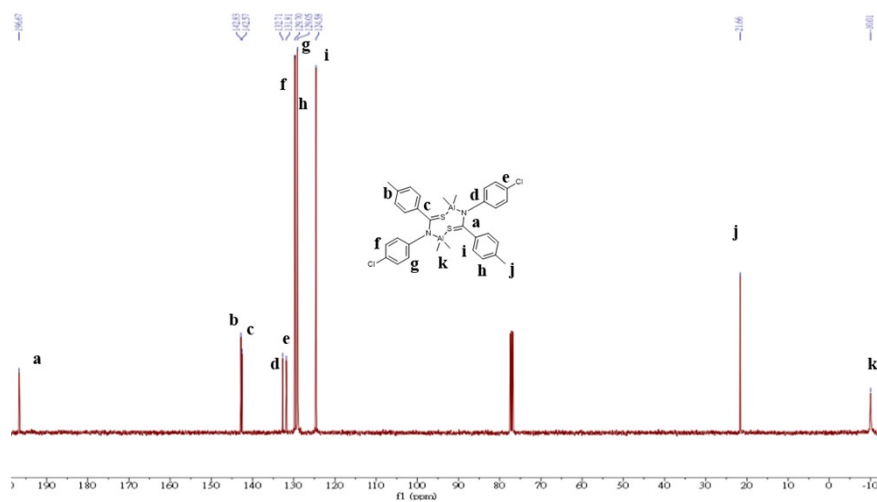

Figure S19.  $^{13}\text{C}$  NMR spectrum of  $\text{S}^{\text{Cl}}\text{-Al}$  in  $\text{CDCl}_3$

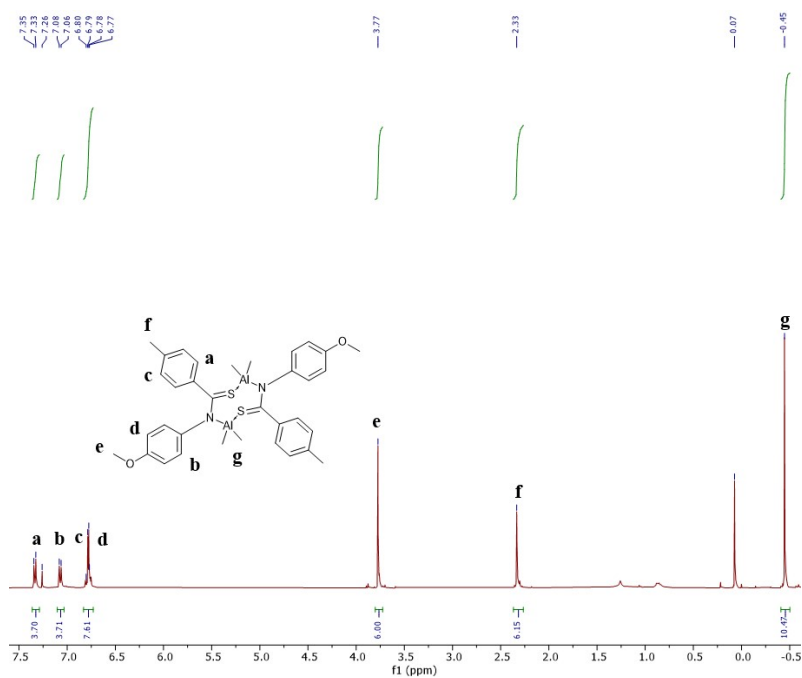

Figure S22.  $^1\text{H}$  NMR spectrum of  $S^{OMe}\text{-Al}$  in  $\text{CDCl}_3$

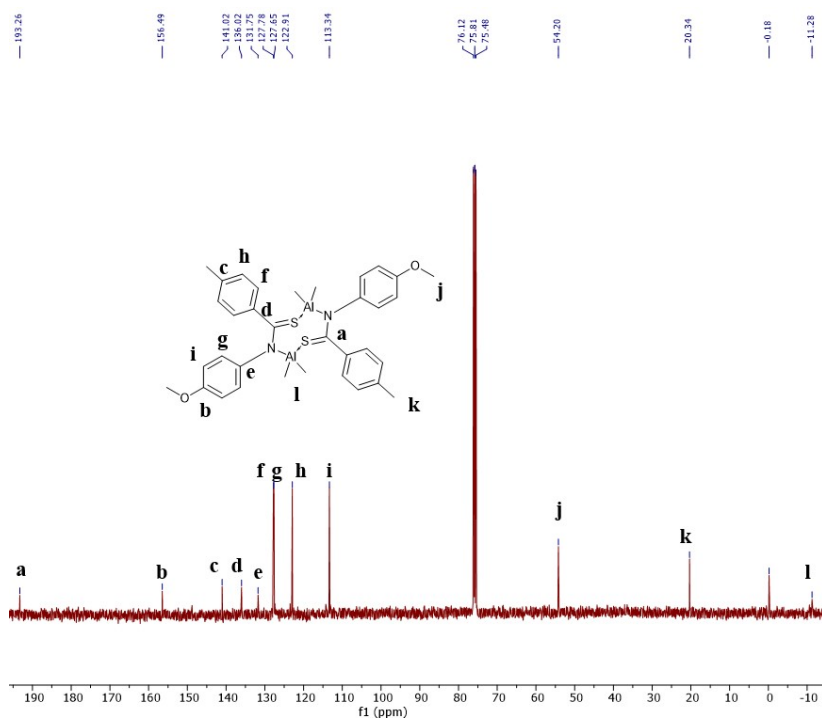

Figure S23.  $^{13}\text{C}$  NMR spectrum of  $S^{OMe}\text{-Al}$  in  $\text{CDCl}_3$

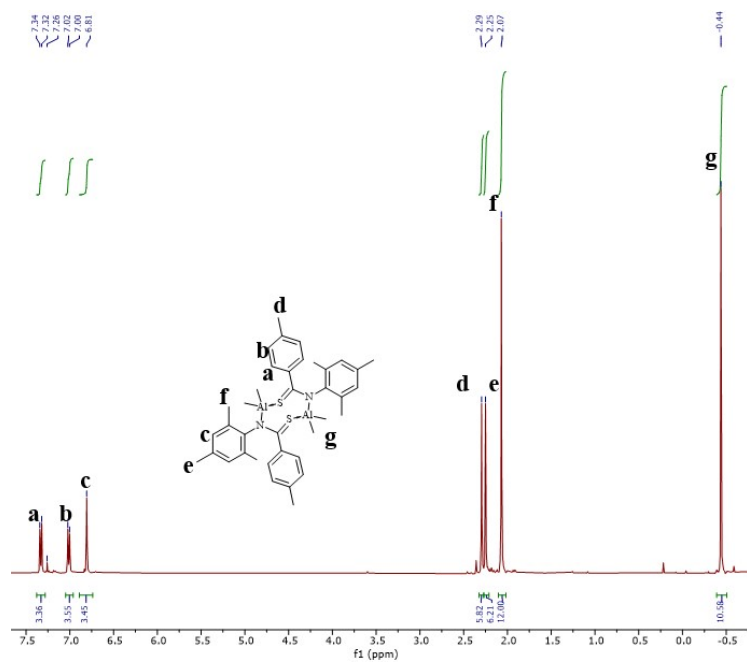

Figure S24.  $^1\text{H}$  NMR spectrum of  $S^{Me}\text{-Al}$  in  $\text{CDCl}_3$

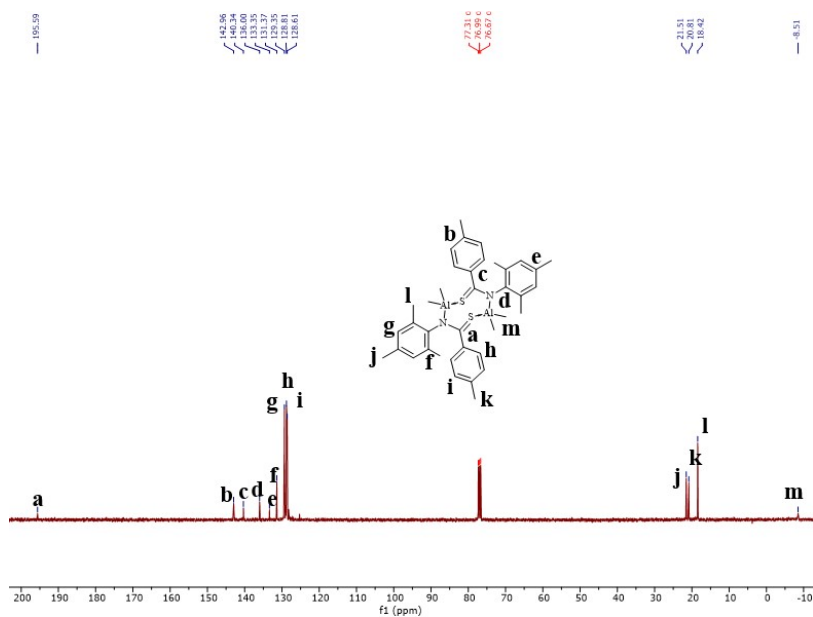

Figure S25.  $^{13}\text{C}$  NMR spectrum of  $S^{Me}\text{-Al}$  in  $\text{CDCl}_3$

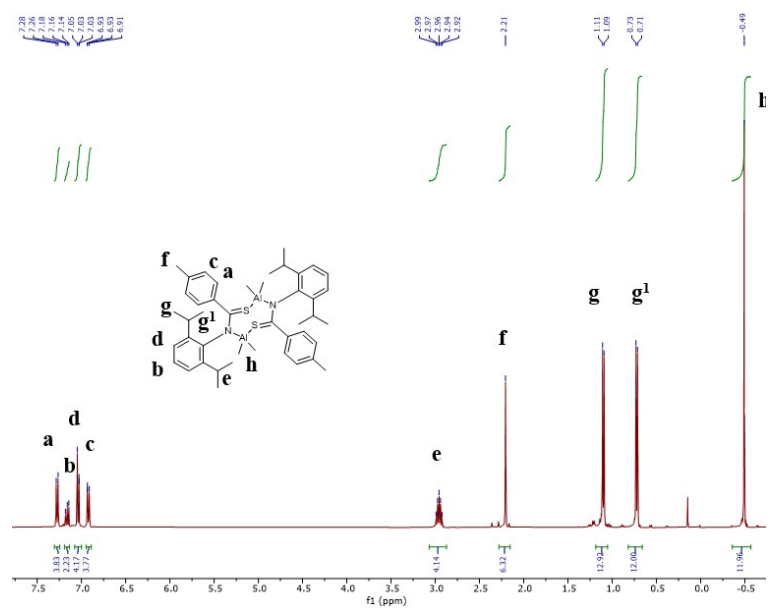

Figure S26.  $^1\text{H}$  NMR spectrum of  $\text{S}^{\text{Pr}}\text{-Al}$  in  $\text{CDCl}_3$

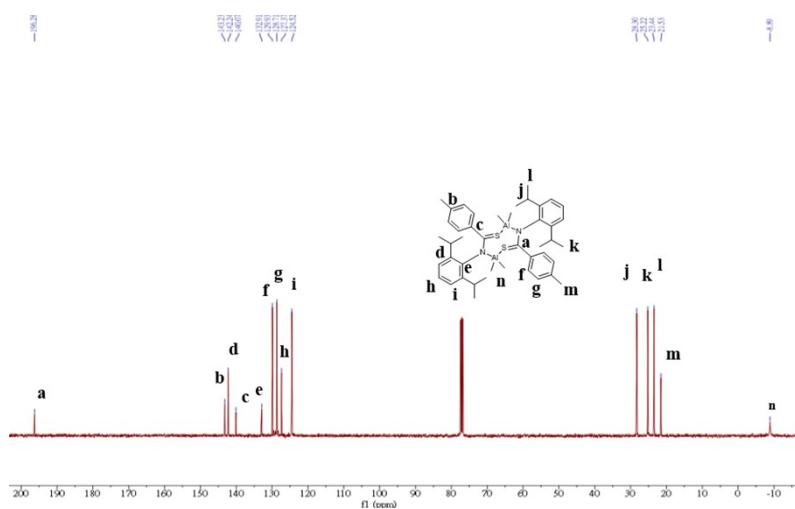

Figure S27.  $^{13}\text{C}$  NMR spectrum of  $\text{S}^{\text{Pr}}\text{-Al}$  in  $\text{CDCl}_3$



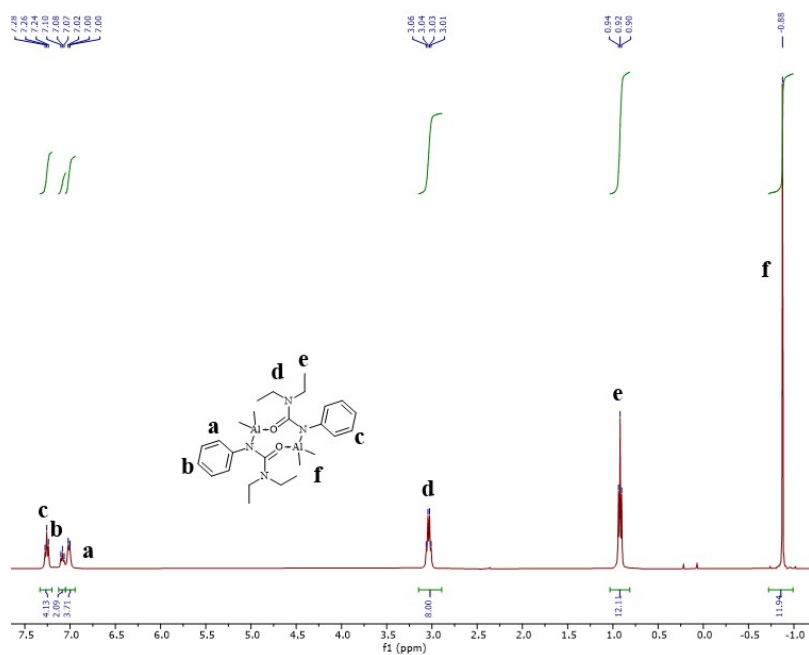

Figure S28.  $^1\text{H}$  NMR spectrum of U<sup>H</sup>-Al in  $\text{CDCl}_3$

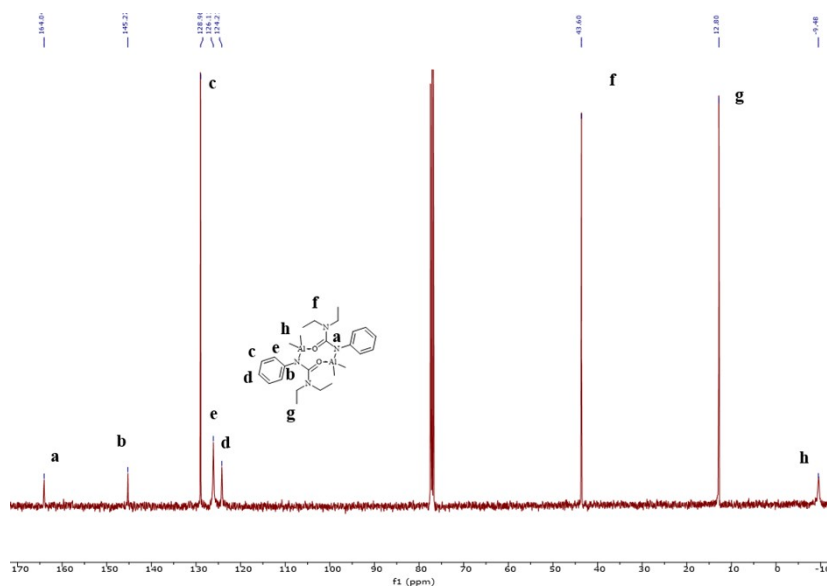

Figure S29.  $^{13}\text{C}$  NMR spectrum of U<sup>H</sup>-Al in  $\text{CDCl}_3$

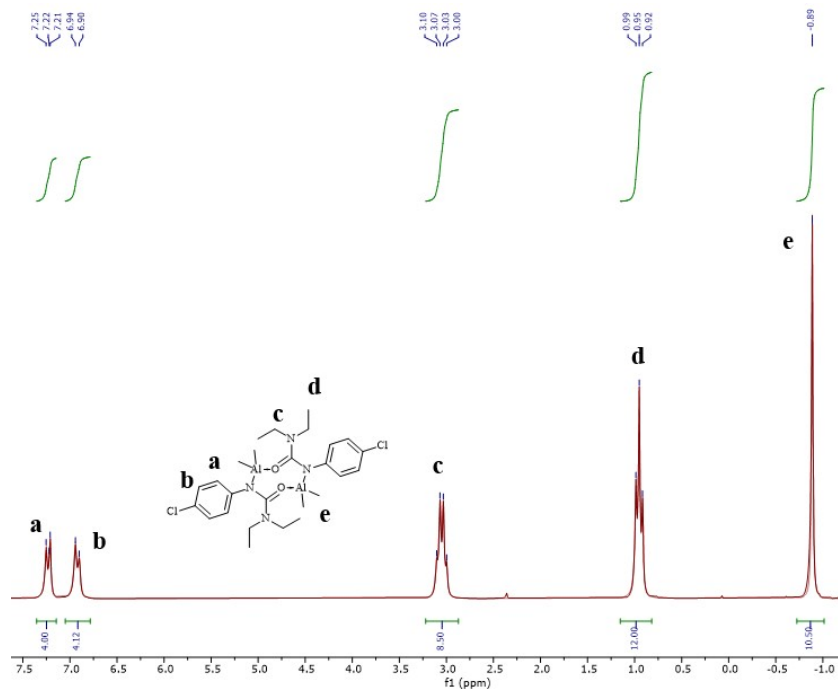

Figure S30.  $^1H$  NMR spectrum of  $U^{Cl}-Al$  in  $CDCl_3$

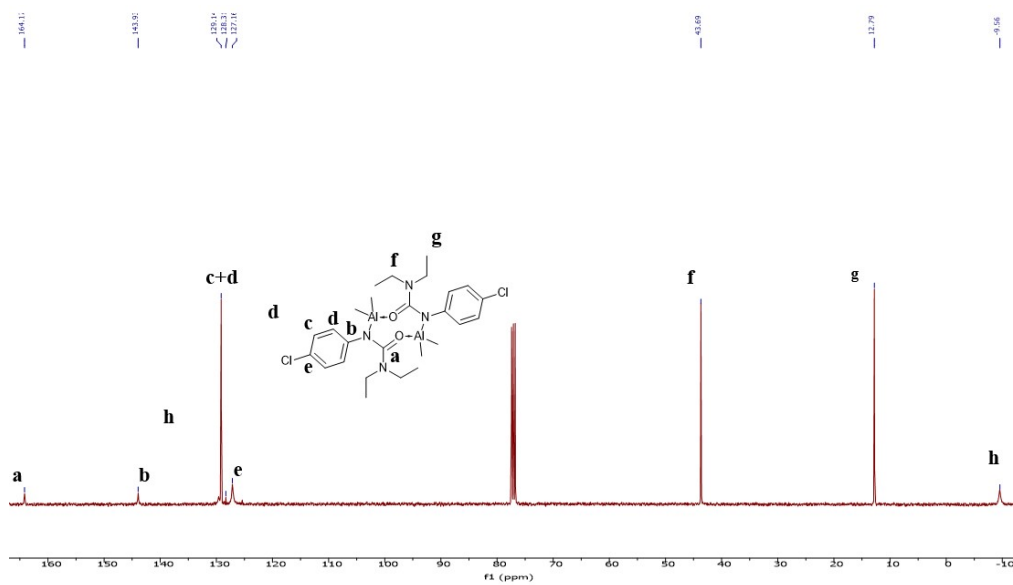

Figure S31.  $^{13}C$  NMR spectrum of  $U^{Cl}-Al$  in  $CDCl_3$

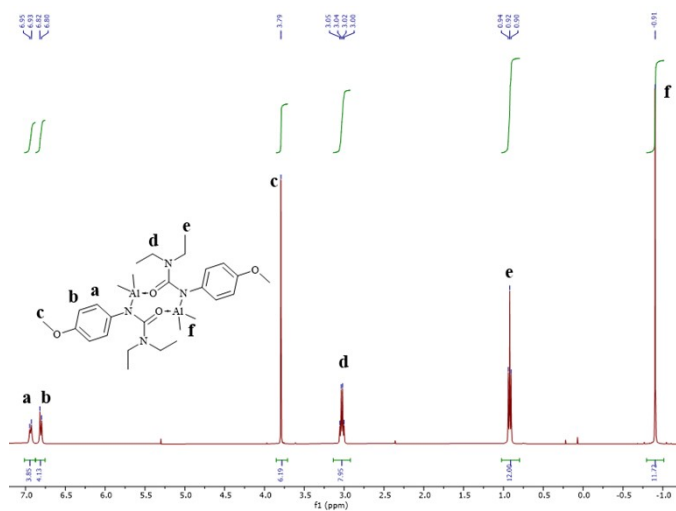

Figure S32.  $^1\text{H}$  NMR spectrum of  $\text{U}^{\text{OMe}}\text{-Al}$  in  $\text{CDCl}_3$

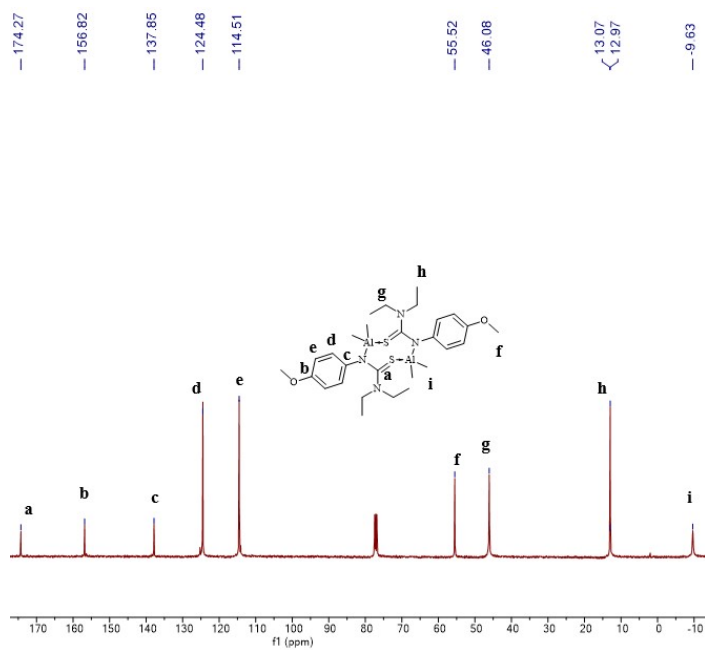

Figure S33.  $^{13}\text{C}$  NMR spectrum of  $\text{U}^{\text{OMe}}$  in  $\text{CDCl}_3$

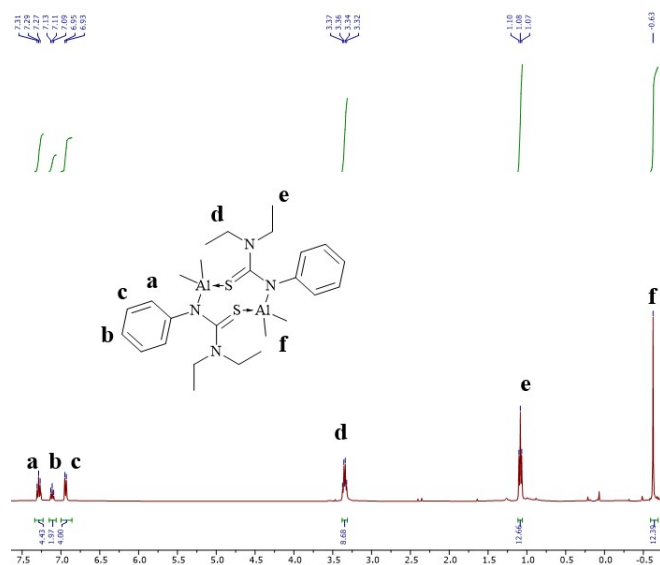

Figure S34.  $^1H$  NMR spectrum of  $US^H-Al$  in  $CDCl_3$

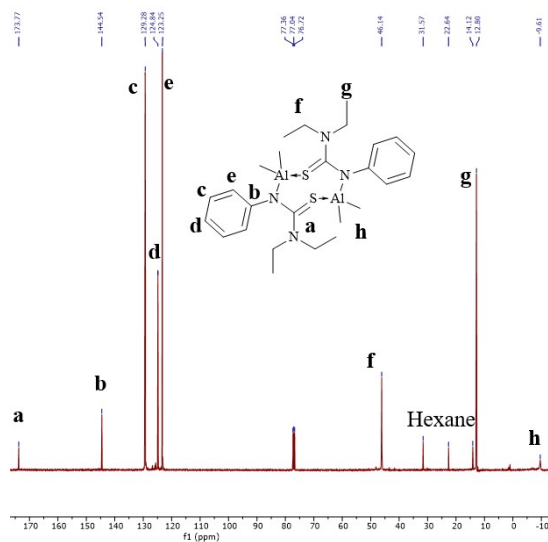

Figure S35.  $^{13}C$  NMR spectrum of  $US^H-Al$  in  $CDCl_3$

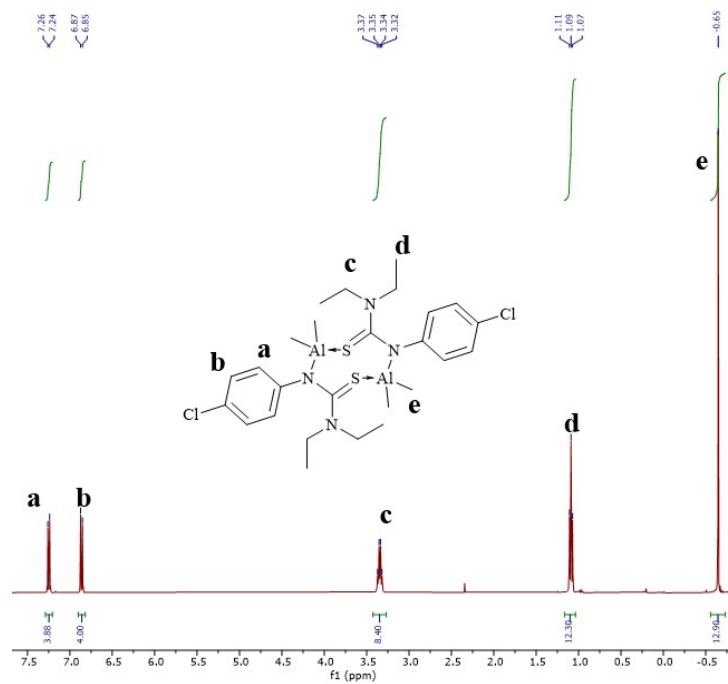

Figure S36.  $^1H$  NMR spectrum of  $US^{Cl-Al}$  in  $CDCl_3$

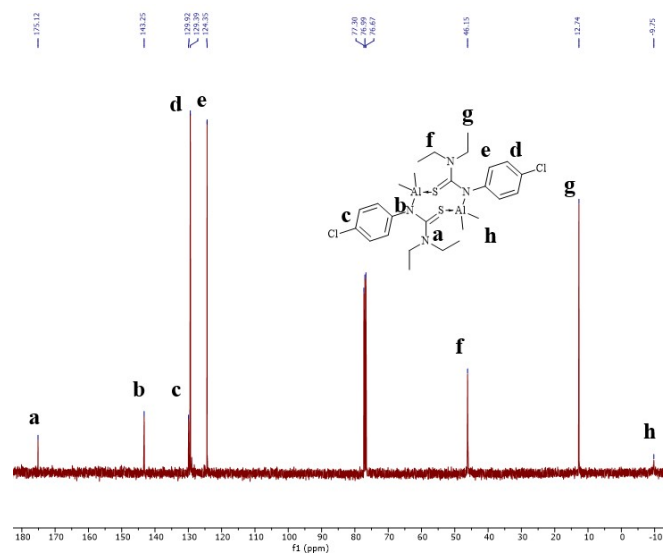

Figure S37.  $^{13}C$  NMR spectrum of  $US^{Cl-Al}$  in  $CDCl_3$

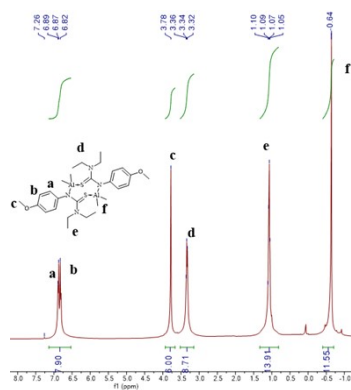

**Figure S38.**  $^1\text{H}$  NMR spectrum of  $\text{US}^{\text{OMe}}\text{-Al}$  in  $\text{CDCl}_3$

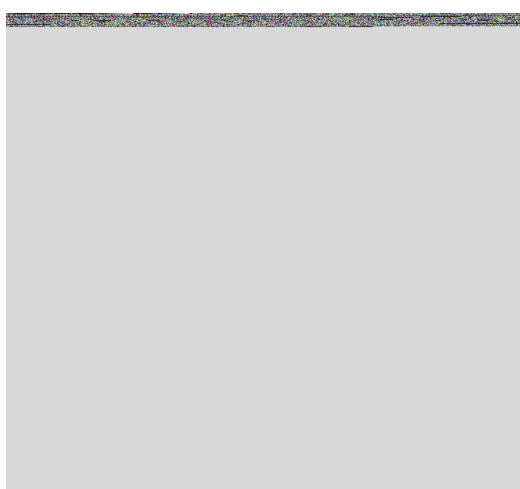

**Figure S39.**  $^{13}\text{C}$  NMR spectrum of  $\text{US}^{\text{OMe}}$  in  $\text{CDCl}_3$

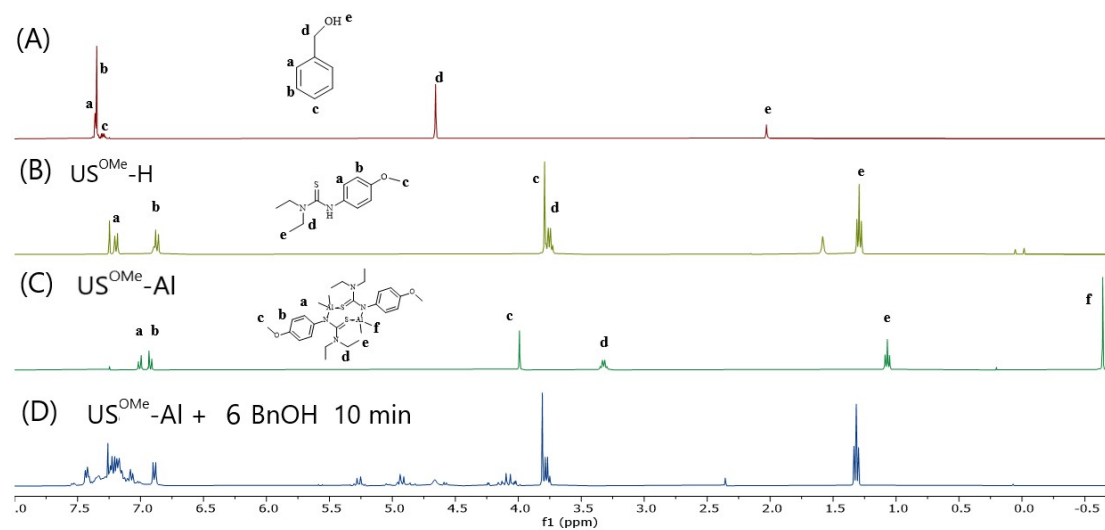

**Figure S40.** The  $^1\text{H}$  NMR spectra of (a)  $\text{BnOH}$ ; (B)  $\text{US}^{\text{OMe}}\text{-H}$ ; (C)  $\text{US}^{\text{OMe}}\text{-Al}$ ; and (D) the alcoholysis reactions of  $\text{US}^{\text{OMe}}\text{-Al}$  with 6 eq.  $\text{BnOH}$

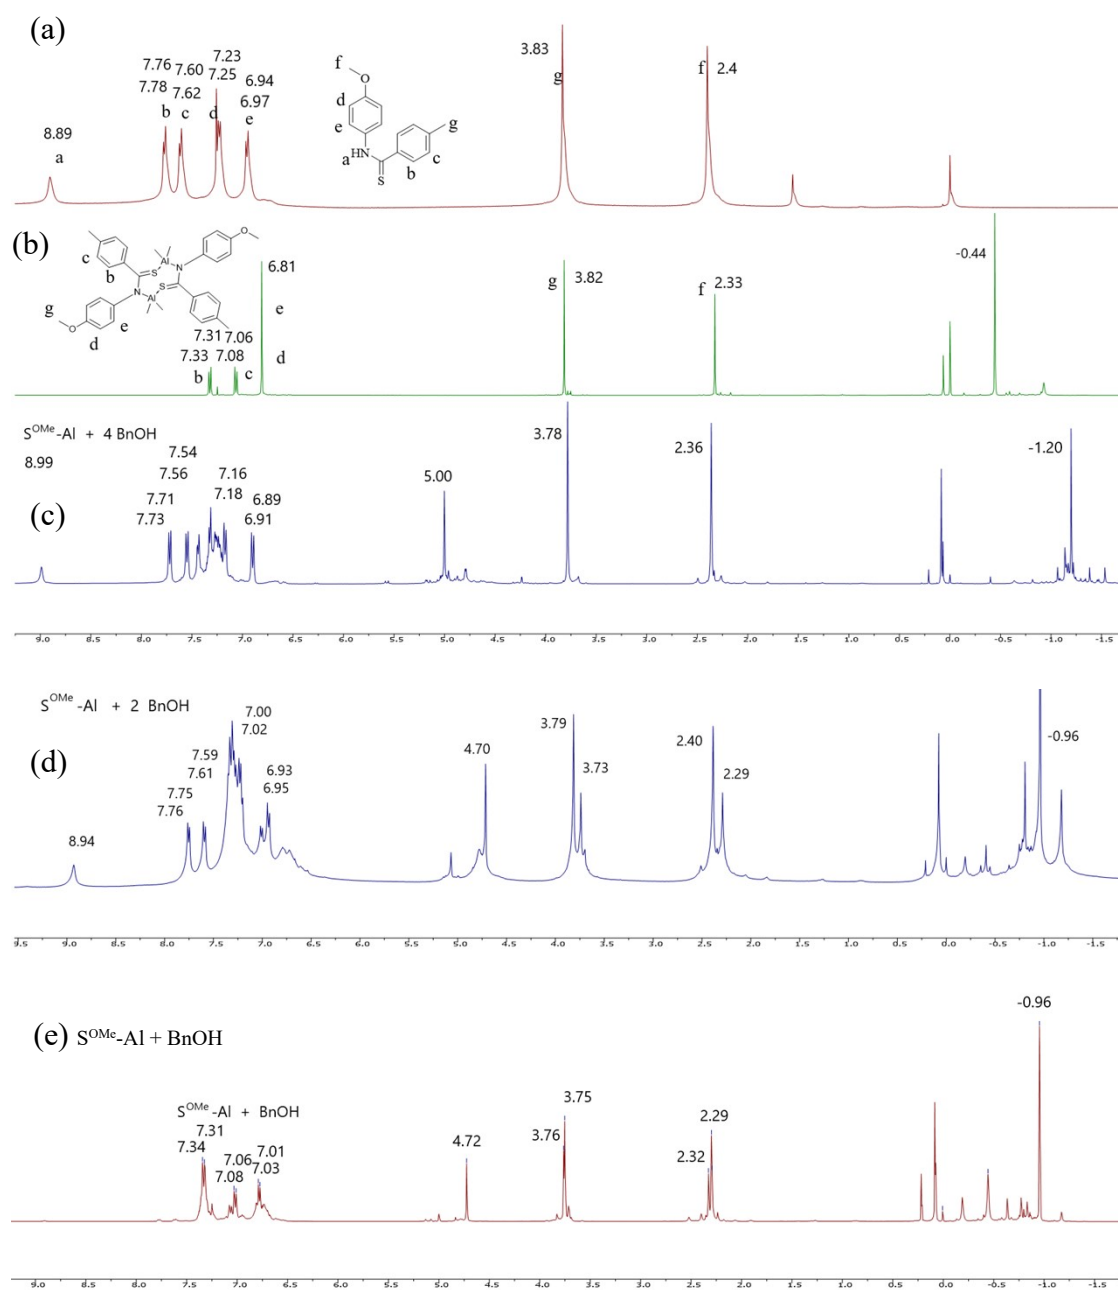

**Figure S41.** The  $^1\text{H}$  NMR spectra of (a)  $\text{S}^{\text{OMe}}\text{-H}$ ; (b)  $\text{S}^{\text{OMe}}\text{-Al}$ ; (c)  $\text{S}^{\text{OMe}}\text{-Al} + 4 \text{ BnOH}$ ; and (d)  $\text{S}^{\text{OMe}}\text{-Al} + 2 \text{ BnOH}$ ; (e)  $\text{S}^{\text{OMe}}\text{-Al} + \text{BnOH}$ .

(a) BnOH ( $D = 7.88 \times 10^{-10} \text{ m}^2/\text{s}$ )

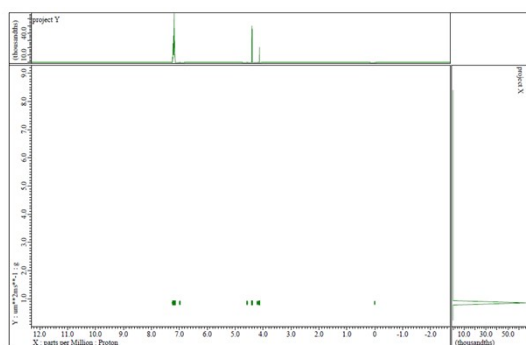

(b)  $\text{S}^{\text{OMe}}\text{-H}$  ( $D = 1.09 \times 10^{-9} \text{ m}^2/\text{s}$ )

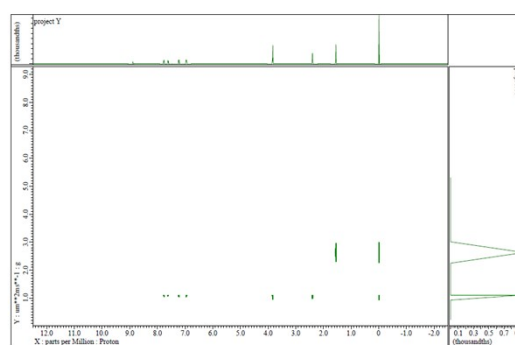

(c)  $\text{S}^{\text{OMe}}\text{-Al}$  ( $D = 4.4 \times 10^{-10} \text{ m}^2/\text{s}$ )

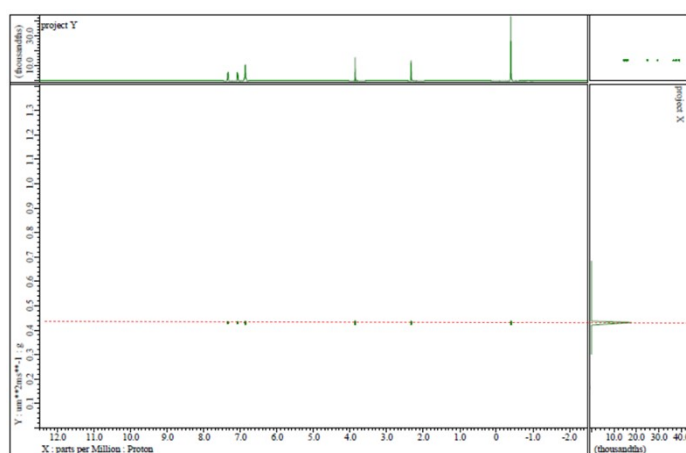

$D = 0.44 \mu\text{m}^2/\text{ms}$   
 $= 4.4 \times 10^{-10} \text{ m}^2/\text{s}$

(d) the mixture of  $\text{S}^{\text{OMe}}\text{-Al}$  with 4 BnOH ( $D = 5.8 \times 10^{-10} \text{ m}^2/\text{s}$ )

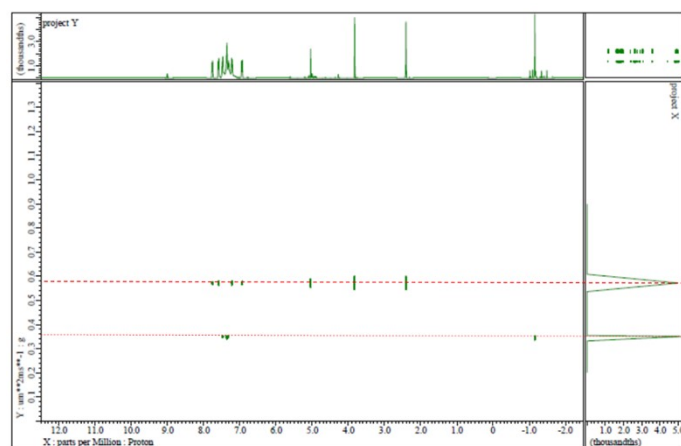

$D = 0.58 \mu\text{m}^2/\text{ms}$   
 $= 5.8 \times 10^{-10} \text{ m}^2/\text{s}$

$D = 0.36 \mu\text{m}^2/\text{ms}$   
 $= 3.5 \times 10^{-10} \text{ m}^2/\text{s}$

**Figure S42.** DOSY spectrum of (a) BnOH; (b)  $\text{S}^{\text{OMe}}\text{-H}$ ; (c)  $\text{S}^{\text{OMe}}\text{-Al}$  and (d) the mixture of  $\text{S}^{\text{OMe}}\text{-Al}$  with 4 BnOH in  $\text{CDCl}_3$



**Table S7.** Cartesian coordinate of CL

| Coordinates (Angstroms) |          |          |          | H | 2.184825 | 0.75521  | 1.008937 |
|-------------------------|----------|----------|----------|---|----------|----------|----------|
| Atom                    | X        | Y        | Z        | H | 1.410535 | -0.91919 | -1.44945 |
| C                       | -1.37346 | -0.02703 | 0.01184  | H | -1.31567 | 1.957244 | 0.674562 |
| C                       | -0.59628 | 1.138495 | 0.608833 | H | 0.882105 | 2.595484 | 0.03376  |
| C                       | 0.6242   | 1.564546 | -0.23669 | H | 2.687581 | 1.078351 | -0.64478 |
| C                       | 1.862385 | 0.680969 | -0.04047 | H | 2.592054 | -1.34185 | -0.21212 |
| C                       | 1.653483 | -0.79893 | -0.38556 | H | 0.655987 | -2.57343 | 0.353959 |
| C                       | 0.556261 | -1.48773 | 0.426478 | H | 0.618886 | -1.21809 | 1.489673 |
| H                       | -0.27355 | 0.899838 | 1.631561 | O | -2.49714 | 0.087685 | -0.41583 |
| H                       | 0.337785 | 1.585549 | -1.29669 | O | -0.7708  | -1.24353 | -0.07348 |

**Table S8.** Cartesian coordinate of [S<sup>Pr</sup>AlOMe<sub>2</sub>]<sub>2</sub>

| Coordinates (Angstroms) |          |          |          | H | 6.529886 | 6.855369 | 4.285084 |
|-------------------------|----------|----------|----------|---|----------|----------|----------|
| Atom                    | X        | Y        | Z        | C | 5.079855 | 6.152457 | 2.870664 |
| Al                      | 0.089082 | 6.105712 | 0.733066 | H | 5.830619 | 5.843557 | 2.155200 |
| N                       | 3.653725 | 4.238963 | 0.844998 | C | 4.951407 | 7.705028 | 6.355227 |
| C                       | 3.282005 | 5.417731 | 1.271547 | H | 4.223817 | 8.432180 | 6.731299 |
| C                       | 3.720600 | 5.994089 | 2.569772 | H | 5.925100 | 8.201247 | 6.285337 |
| C                       | 2.761114 | 6.422633 | 3.500229 | H | 5.041361 | 6.913495 | 7.111166 |
| H                       | 1.705853 | 6.281838 | 3.289498 | C | 4.529416 | 3.403888 | 1.656092 |
| C                       | 3.167024 | 6.966322 | 4.715473 | C | 3.998477 | 2.711386 | 2.759080 |
| H                       | 2.411982 | 7.273276 | 5.435400 | C | 4.872813 | 1.899169 | 3.491296 |
| C                       | 4.523883 | 7.132108 | 5.025836 | H | 4.491376 | 1.349159 | 4.346383 |
| C                       | 5.470526 | 6.726406 | 4.076740 | C | 6.211632 | 1.770696 | 3.136354 |

|    |           |          |           |   |           |          |           |
|----|-----------|----------|-----------|---|-----------|----------|-----------|
| C  | 6.702115  | 2.447587 | 2.023090  | C | -3.280389 | 7.716677 | -3.138697 |
| H  | 7.743512  | 2.328046 | 1.738629  | C | -3.770790 | 7.039740 | -2.025427 |
| C  | 5.873159  | 3.272180 | 1.256481  | H | -4.812182 | 7.159221 | -1.740920 |
| Al | 2.842403  | 3.381690 | -0.735551 | C | -2.941761 | 6.215171 | -1.258871 |
| N  | -0.722281 | 5.248476 | -0.847495 | H | -3.939765 | 8.353458 | -3.722529 |
| C  | -0.350555 | 4.069713 | -1.274043 | H | 6.870951  | 1.133894 | 3.720227  |
| C  | -0.789171 | 3.493302 | -2.572236 | C | 6.425748  | 3.956092 | 0.008577  |
| C  | 0.170364  | 3.064678 | -3.502722 | H | 5.680172  | 4.676268 | -0.346774 |
| H  | 1.225616  | 3.205556 | -3.292002 | C | 6.648520  | 2.920416 | -1.112360 |
| C  | -0.235538 | 2.520881 | -4.717827 | H | 6.968956  | 3.416279 | -2.036819 |
| H  | 0.519482  | 2.213853 | -5.437764 | H | 7.429962  | 2.207205 | -0.823366 |
| C  | -1.592482 | 2.354989 | -5.028152 | H | 5.732853  | 2.355796 | -1.305044 |
| C  | -2.539059 | 2.760780 | -4.079159 | C | 7.721416  | 4.744224 | 0.275148  |
| H  | -3.598417 | 2.631841 | -4.287464 | H | 8.034996  | 5.267828 | -0.635206 |
| C  | -2.148352 | 3.334895 | -2.873076 | H | 7.597050  | 5.490996 | 1.066905  |
| H  | -2.899138 | 3.643884 | -2.157674 | H | 8.541632  | 4.080902 | 0.571486  |
| C  | -2.019317 | 1.781596 | -6.357559 | C | 2.519202  | 2.748929 | 3.124969  |
| H  | -1.300304 | 1.041205 | -6.724343 | H | 2.022875  | 3.538409 | 2.555073  |
| H  | -3.001016 | 1.300874 | -6.292274 | C | 2.286614  | 3.061010 | 4.612873  |
| H  | -2.091061 | 2.570238 | -7.118438 | H | 1.212525  | 3.149285 | 4.810715  |
| C  | -1.598030 | 6.083537 | -1.658538 | H | 2.675511  | 2.267333 | 5.261423  |
| C  | -1.067173 | 6.776086 | -2.761540 | H | 2.764364  | 4.002741 | 4.899158  |
| C  | -1.941580 | 7.588274 | -3.493700 | C | 1.857291  | 1.415125 | 2.724107  |
| H  | -1.560206 | 8.138322 | -4.348792 | H | 0.773330  | 1.464439 | 2.878039  |

|   |           |          |           |   |           |           |           |
|---|-----------|----------|-----------|---|-----------|-----------|-----------|
| H | 2.051722  | 1.184794 | 1.672119  | O | -0.574935 | 7.691619  | 0.551972  |
| H | 2.253158  | 0.588157 | 3.326438  | O | -0.043043 | 5.318669  | 2.260632  |
| C | -3.494260 | 5.531204 | -0.010957 | O | 3.506366  | 1.795774  | -0.554418 |
| H | -2.748636 | 4.811049 | 0.344336  | O | 2.974573  | 4.168738  | -2.263106 |
| C | 0.412086  | 6.738625 | -3.127505 | C | 3.191304  | 0.649588  | -1.309425 |
| H | 0.908511  | 5.949241 | -2.557559 | H | 3.721808  | 0.644706  | -2.274387 |
| C | -3.717012 | 6.566841 | 1.110016  | H | 3.495584  | -0.247831 | -0.754135 |
| H | -4.498497 | 7.280032 | 0.821085  | H | 2.112331  | 0.567506  | -1.515837 |
| H | -4.037379 | 6.070944 | 2.034482  | C | 3.868301  | 5.109120  | -2.802840 |
| H | -2.801354 | 7.131489 | 1.302663  | H | 3.625761  | 5.275797  | -3.860717 |
| C | -4.789905 | 4.743022 | -0.277490 | H | 3.798158  | 6.075209  | -2.282645 |
| H | -4.665533 | 3.996269 | -1.069264 | H | 4.912641  | 4.763901  | -2.752493 |
| H | -5.103430 | 4.219389 | 0.632866  | C | -0.936799 | 4.378306  | 2.800361  |
| H | -5.610161 | 5.406314 | -0.573788 | H | -0.866594 | 3.412186  | 2.280235  |
| C | 1.073913  | 8.072522 | -2.726814 | H | -0.694343 | 4.211711  | 3.858270  |
| H | 0.879497  | 8.302958 | -1.674847 | H | -1.981143 | 4.723500  | 2.749908  |
| H | 2.157872  | 8.023270 | -2.880774 | C | -0.259731 | 8.837811  | 1.306921  |
| H | 0.677966  | 8.899394 | -3.329225 | H | -0.563473 | 9.735258  | 0.751382  |
| C | 0.644610  | 6.426418 | -4.615393 | H | -0.790610 | 8.843021  | 2.271674  |
| H | 0.255586  | 7.219987 | -5.263998 | H | 0.819191  | 8.919546  | 1.513740  |
| H | 1.718695  | 6.338236 | -4.813301 | S | 0.619438  | 3.042161  | -0.218862 |
| H | 0.166939  | 5.484607 | -4.901547 | S | 2.312028  | 6.445298  | 0.216368  |

---

**Table S9.** Cartesian coordinate of [S<sup>Pr</sup>AlOMe<sub>2</sub>]<sub>2</sub> in state 1b

| Coordinates (Angstroms) |          |           |           | C  | 5.031876  | -3.455663 | 0.085865  |
|-------------------------|----------|-----------|-----------|----|-----------|-----------|-----------|
| Atom                    | X        | Y         | Z         | H  | 5.486359  | -4.240396 | -0.512736 |
| Al                      | 0.288008 | 2.617687  | -0.127047 | C  | 4.044058  | -2.648217 | -0.485381 |
| N                       | 2.415696 | -0.817615 | -0.288484 | Al | 0.454274  | -1.638116 | -0.133909 |
| C                       | 2.715052 | 0.395020  | -0.662248 | N  | -1.508920 | 1.795529  | -0.014035 |
| C                       | 4.047335 | 1.032617  | -0.431559 | C  | -1.625129 | 0.713397  | 0.710875  |
| C                       | 4.099896 | 2.232061  | 0.295760  | C  | -2.907145 | 0.078681  | 1.107756  |
| H                       | 3.184303 | 2.650947  | 0.701468  | C  | -4.034171 | 0.019307  | 0.271846  |
| C                       | 5.322115 | 2.853224  | 0.533244  | H  | -3.993162 | 0.417300  | -0.730890 |
| H                       | 5.345161 | 3.770985  | 1.116585  | C  | -5.220116 | -0.558866 | 0.719673  |
| C                       | 6.519059 | 2.322756  | 0.032052  | H  | -6.075421 | -0.593614 | 0.048918  |
| C                       | 6.451374 | 1.140399  | -0.714116 | C  | -5.334007 | -1.080890 | 2.013294  |
| H                       | 7.362594 | 0.711656  | -1.124662 | C  | -4.204677 | -1.029163 | 2.841966  |
| C                       | 5.236934 | 0.494782  | -0.935404 | H  | -4.258561 | -1.437900 | 3.848042  |
| H                       | 5.215868 | -0.425075 | -1.504717 | C  | -3.010995 | -0.476388 | 2.397150  |
| C                       | 7.842019 | 2.993402  | 0.314446  | H  | -2.144777 | -0.465698 | 3.048106  |
| H                       | 7.740440 | 4.083900  | 0.344216  | C  | -6.619524 | -1.700049 | 2.504443  |
| H                       | 8.591084 | 2.742055  | -0.443876 | H  | -7.415311 | -1.628278 | 1.756428  |
| H                       | 8.242423 | 2.678170  | 1.287355  | H  | -6.479015 | -2.761619 | 2.745606  |
| C                       | 3.467203 | -1.635898 | 0.308785  | H  | -6.971333 | -1.208587 | 3.419374  |
| C                       | 3.849139 | -1.445311 | 1.650381  | C  | -2.634412 | 2.493982  | -0.591034 |
| C                       | 4.841354 | -2.283463 | 2.174287  | C  | -2.925940 | 2.282779  | -1.952714 |
| H                       | 5.146792 | -2.154390 | 3.208526  | C  | -3.996649 | 2.995949  | -2.501218 |
| C                       | 5.435390 | -3.277820 | 1.405685  | H  | -4.244892 | 2.857006  | -3.549590 |

|   |           |           |           |   |           |           |           |
|---|-----------|-----------|-----------|---|-----------|-----------|-----------|
| C | -4.745310 | 3.882911  | -1.729692 | H | 1.532421  | -1.768206 | 3.035015  |
| C | -4.422534 | 4.081443  | -0.390969 | H | 2.831362  | -1.779293 | 4.238716  |
| H | -4.999941 | 4.784508  | 0.203099  | C | -2.984905 | 3.676819  | 1.656063  |
| C | -3.354539 | 3.399529  | 0.204495  | H | -2.133556 | 3.045987  | 1.926175  |
| H | -5.574789 | 4.425325  | -2.175922 | C | -2.113499 | 1.322662  | -2.816701 |
| H | 6.204701  | -3.915073 | 1.834150  | H | -1.447990 | 0.740434  | -2.172625 |
| C | 3.603586  | -2.912185 | -1.921400 | C | -2.522378 | 5.136426  | 1.820850  |
| H | 2.929981  | -2.107062 | -2.220673 | H | -3.340103 | 5.838947  | 1.620005  |
| C | 2.817768  | -4.235095 | -2.010108 | H | -2.168155 | 5.313028  | 2.843364  |
| H | 2.442331  | -4.392678 | -3.029075 | H | -1.706415 | 5.357320  | 1.125419  |
| H | 3.462207  | -5.085281 | -1.754161 | C | -4.135238 | 3.325989  | 2.616552  |
| H | 1.976921  | -4.223455 | -1.312962 | H | -4.429624 | 2.276144  | 2.511645  |
| C | 4.774729  | -2.916528 | -2.921300 | H | -3.828430 | 3.494408  | 3.655627  |
| H | 4.396639  | -3.057697 | -3.940809 | H | -5.018731 | 3.946662  | 2.425340  |
| H | 5.337624  | -1.977065 | -2.901270 | C | -1.228933 | 2.110565  | -3.800983 |
| H | 5.479538  | -3.730353 | -2.716047 | H | -0.611662 | 2.831540  | -3.260264 |
| C | 3.191064  | -0.421989 | 2.566810  | H | -0.572646 | 1.429490  | -4.354531 |
| H | 2.579958  | 0.254772  | 1.965869  | H | -1.844633 | 2.661389  | -4.523404 |
| C | 4.211873  | 0.454924  | 3.313071  | C | -3.002287 | 0.313493  | -3.565500 |
| H | 3.688299  | 1.248399  | 3.858727  | H | -3.654645 | 0.805056  | -4.296752 |
| H | 4.787757  | -0.124441 | 4.044533  | H | -2.377358 | -0.403153 | -4.109573 |
| H | 4.913947  | 0.924404  | 2.618482  | H | -3.637893 | -0.255241 | -2.878399 |
| C | 2.254601  | -1.137644 | 3.560977  | O | -0.159643 | 3.988259  | -1.102511 |
| H | 1.702894  | -0.406675 | 4.162973  | O | 1.007031  | 3.065896  | 1.394513  |

|   |           |           |           |   |           |           |           |
|---|-----------|-----------|-----------|---|-----------|-----------|-----------|
| O | 1.141048  | -3.046479 | 0.600881  | S | 1.572585  | 1.392667  | -1.578876 |
| O | -0.168567 | -1.572844 | -1.760779 | C | -2.307502 | -3.248115 | 0.042407  |
| C | 0.685337  | -4.082219 | 1.416467  | C | -2.510674 | -3.560227 | -1.420094 |
| H | 0.085467  | -3.719145 | 2.264640  | C | -3.898998 | -3.135873 | -1.947903 |
| H | 0.060294  | -4.804984 | 0.862517  | C | -5.034663 | -4.106463 | -1.605238 |
| H | 1.547422  | -4.633147 | 1.819150  | C | -5.268719 | -4.295374 | -0.101530 |
| C | 0.431474  | -1.548672 | -3.028801 | C | -4.059792 | -4.829162 | 0.661769  |
| H | -0.296488 | -1.194718 | -3.772499 | H | -2.355565 | -4.635190 | -1.587088 |
| H | 1.293020  | -0.871819 | -3.080002 | H | -4.133468 | -2.135319 | -1.567071 |
| H | 0.761533  | -2.553907 | -3.334549 | H | -4.816311 | -5.085310 | -2.057308 |
| C | 1.218496  | 4.389183  | 1.830175  | H | -5.568919 | -3.349050 | 0.362449  |
| H | 0.819222  | 4.520229  | 2.846353  | H | -1.720347 | -3.010159 | -1.933058 |
| H | 2.295960  | 4.619045  | 1.863384  | H | -3.822914 | -3.042365 | -3.036936 |
| H | 0.738254  | 5.137434  | 1.182731  | H | -5.963734 | -3.752600 | -2.069476 |
| C | 0.674961  | 4.900056  | -1.769533 | H | -6.093350 | -5.004018 | 0.050835  |
| H | 0.151833  | 5.310119  | -2.645822 | H | -4.355853 | -5.193076 | 1.647735  |
| H | 0.949683  | 5.748027  | -1.121308 | H | -3.574781 | -5.655538 | 0.127261  |
| H | 1.609093  | 4.437395  | -2.126466 | O | -1.467541 | -2.454760 | 0.450004  |
| S | -0.101092 | 0.099567  | 1.353588  | O | -3.076950 | -3.815238 | 0.977715  |

---

**Table S10.** Cartesian coordinate of S<sup>Pr</sup>AlOMe<sub>2</sub>

| Coordinates (Angstroms) |           |          |           |   |           |          |           |
|-------------------------|-----------|----------|-----------|---|-----------|----------|-----------|
| Atom                    | X         | Y        | Z         |   |           |          |           |
|                         |           |          |           | C | -3.536365 | 6.897464 | -2.104081 |
|                         |           |          |           | H | -4.597553 | 6.709378 | -1.967183 |
| Al                      | 0.729943  | 5.653129 | 0.562817  | C | -2.609843 | 6.016644 | -1.533750 |
| N                       | -0.251917 | 5.467950 | -1.100037 | H | -3.864961 | 8.682536 | -3.261470 |
| C                       | 0.008199  | 4.201404 | -1.366835 | C | -3.106374 | 4.838008 | -0.703262 |
| C                       | -0.559331 | 3.431501 | -2.490820 | H | -2.252744 | 4.219528 | -0.419341 |
| C                       | -0.823989 | 4.036691 | -3.731528 | C | 0.683007  | 7.733419 | -2.632626 |
| H                       | -0.581799 | 5.080238 | -3.889199 | H | 1.262994  | 6.921100 | -2.187665 |
| C                       | -1.385256 | 3.298231 | -4.767392 | C | -3.738940 | 5.330773 | 0.611420  |
| H                       | -1.570641 | 3.780603 | -5.723862 | H | -4.590256 | 5.995226 | 0.421595  |
| C                       | -1.719310 | 1.946729 | -4.599265 | H | -4.096070 | 4.480849 | 1.204761  |
| C                       | -1.445015 | 1.347345 | -3.362213 | H | -2.998240 | 5.872273 | 1.208175  |
| H                       | -1.687715 | 0.298675 | -3.209947 | C | -4.064490 | 3.937042 | -1.502959 |
| C                       | -0.864620 | 2.070629 | -2.325746 | H | -3.594120 | 3.587194 | -2.427998 |
| H                       | -0.660987 | 1.590148 | -1.374414 | H | -4.342900 | 3.060247 | -0.906979 |
| C                       | -2.378316 | 1.167687 | -5.710662 | H | -4.988761 | 4.463167 | -1.768651 |
| H                       | -2.064526 | 1.529219 | -6.695498 | C | 1.078265  | 9.018171 | -1.882723 |
| H                       | -2.144340 | 0.099989 | -5.646862 | H | 0.886379  | 8.908645 | -0.811929 |
| H                       | -3.470759 | 1.266851 | -5.659582 | H | 2.148607  | 9.216790 | -2.011316 |
| C                       | -1.239929 | 6.294907 | -1.726563 | H | 0.522411  | 9.886922 | -2.256292 |
| C                       | -0.798550 | 7.425721 | -2.444048 | C | 1.063764  | 7.815398 | -4.122282 |
| C                       | -1.768061 | 8.272830 | -2.991987 | H | 0.549343  | 8.640839 | -4.628249 |
| H                       | -1.451925 | 9.148887 | -3.551434 | H | 2.142053  | 7.981146 | -4.227970 |
| C                       | -3.126191 | 8.012824 | -2.829274 | H | 0.811599  | 6.889995 | -4.653593 |

|    |           |          |           |   |           |          |           |
|----|-----------|----------|-----------|---|-----------|----------|-----------|
| O  | 1.972799  | 6.818852 | 0.352358  | C | -2.378316 | 1.167687 | -5.710662 |
| O  | -0.279666 | 5.735464 | 1.951936  | H | -2.064526 | 1.529219 | -6.695498 |
| C  | -0.556273 | 6.840410 | 2.782046  | H | -2.144340 | 0.099989 | -5.646862 |
| H  | -0.354950 | 6.585594 | 3.831980  | H | -3.470759 | 1.266851 | -5.659582 |
| H  | 0.044687  | 7.728972 | 2.531440  | C | -1.239929 | 6.294907 | -1.726563 |
| H  | -1.616200 | 7.123705 | 2.702621  | C | -0.798550 | 7.425721 | -2.444048 |
| C  | 2.937121  | 7.354931 | 1.223242  | C | -1.768061 | 8.272830 | -2.991987 |
| H  | 3.222823  | 8.358846 | 0.879804  | H | -1.451925 | 9.148887 | -3.551434 |
| H  | 2.572537  | 7.449620 | 2.258575  | C | -3.126191 | 8.012824 | -2.829274 |
| H  | 3.846666  | 6.735914 | 1.242188  | C | -3.536365 | 6.897464 | -2.104081 |
| S  | 1.093357  | 3.469174 | -0.199581 | H | -4.597553 | 6.709378 | -1.967183 |
| Al | 0.729943  | 5.653129 | 0.562817  | C | -2.609843 | 6.016644 | -1.533750 |
| N  | -0.251917 | 5.467950 | -1.100037 | H | -3.864961 | 8.682536 | -3.261470 |
| C  | 0.008199  | 4.201404 | -1.366835 | C | -3.106374 | 4.838008 | -0.703262 |
| C  | -0.559331 | 3.431501 | -2.490820 | H | -2.252744 | 4.219528 | -0.419341 |
| C  | -0.823989 | 4.036691 | -3.731528 | C | 0.683007  | 7.733419 | -2.632626 |
| H  | -0.581799 | 5.080238 | -3.889199 | H | 1.262994  | 6.921100 | -2.187665 |
| C  | -1.385256 | 3.298231 | -4.767392 | C | -3.738940 | 5.330773 | 0.611420  |
| H  | -1.570641 | 3.780603 | -5.723862 | H | -4.590256 | 5.995226 | 0.421595  |
| C  | -1.719310 | 1.946729 | -4.599265 | H | -4.096070 | 4.480849 | 1.204761  |
| C  | -1.445015 | 1.347345 | -3.362213 | H | -2.998240 | 5.872273 | 1.208175  |
| H  | -1.687715 | 0.298675 | -3.209947 | C | -4.064490 | 3.937042 | -1.502959 |
| C  | -0.864620 | 2.070629 | -2.325746 | H | -3.594120 | 3.587194 | -2.427998 |
| H  | -0.660987 | 1.590148 | -1.374414 | H | -4.342900 | 3.060247 | -0.906979 |



|   |           |          |           |   |           |          |           |
|---|-----------|----------|-----------|---|-----------|----------|-----------|
| H | -4.988761 | 4.463167 | -1.768651 | O | -0.279666 | 5.735464 | 1.951936  |
| C | 1.078265  | 9.018171 | -1.882723 | C | -0.556273 | 6.840410 | 2.782046  |
| H | 0.886379  | 8.908645 | -0.811929 | H | -0.354950 | 6.585594 | 3.831980  |
| H | 2.148607  | 9.216790 | -2.011316 | H | 0.044687  | 7.728972 | 2.531440  |
| H | 0.522411  | 9.886922 | -2.256292 | H | -1.616200 | 7.123705 | 2.702621  |
| C | 1.063764  | 7.815398 | -4.122282 | C | 2.937121  | 7.354931 | 1.223242  |
| H | 0.549343  | 8.640839 | -4.628249 | H | 3.222823  | 8.358846 | 0.879804  |
| H | 2.142053  | 7.981146 | -4.227970 | H | 2.572537  | 7.449620 | 2.258575  |
| H | 0.811599  | 6.889995 | -4.653593 | H | 3.846666  | 6.735914 | 1.242188  |
| O | 1.972799  | 6.818852 | 0.352358  | S | 1.093357  | 3.469174 | -0.199581 |

**Table S11.** Cartesian coordinate of S<sup>Pr</sup>AlOMe<sub>2</sub> in state 1a

| Coordinates (Angstroms) |           |           |           | C | -2.730183 | -1.688215 | 1.797539  |
|-------------------------|-----------|-----------|-----------|---|-----------|-----------|-----------|
| Atom                    | X         | Y         | Z         | H | -2.392061 | -2.714278 | 1.897529  |
| Al                      | 1.531112  | -2.028145 | -0.640476 | C | -5.491243 | 0.556026  | 3.181529  |
| N                       | 0.289207  | -0.586500 | 0.048255  | H | -6.043408 | 1.333074  | 2.642006  |
| C                       | -0.796801 | -1.285034 | 0.271518  | H | -6.184234 | -0.261430 | 3.407152  |
| C                       | -2.014807 | -0.808963 | 0.969230  | H | -5.173073 | 0.988709  | 4.139454  |
| C                       | -2.471794 | 0.513723  | 0.845729  | C | 0.543080  | 0.737499  | 0.525965  |
| H                       | -1.945973 | 1.211833  | 0.207530  | C | 0.624113  | 1.782535  | -0.418671 |
| C                       | -3.600846 | 0.937989  | 1.539165  | C | 0.895580  | 3.073833  | 0.046431  |
| H                       | -3.941264 | 1.964073  | 1.421585  | H | 0.952357  | 3.892716  | -0.665975 |
| C                       | -4.300943 | 0.071617  | 2.389781  | C | 1.093958  | 3.325061  | 1.401402  |
| C                       | -3.847043 | -1.249091 | 2.501896  | C | 1.034532  | 2.274708  | 2.312580  |
| H                       | -4.376179 | -1.943769 | 3.150025  | H | 1.207118  | 2.471462  | 3.367294  |

|   |           |           |           |   |           |           |           |
|---|-----------|-----------|-----------|---|-----------|-----------|-----------|
| C | 0.764824  | 0.963855  | 1.901625  | C | 3.365944  | -3.083521 | 1.283444  |
| H | 1.302637  | 4.334975  | 1.745336  | H | 2.790115  | -4.007877 | 1.456134  |
| C | 0.752932  | -0.155452 | 2.936194  | H | 4.219288  | -3.346644 | 0.636514  |
| H | 0.508386  | -1.092445 | 2.432666  | H | 3.772965  | -2.765249 | 2.254685  |
| C | 0.412892  | 1.539244  | -1.908538 | C | 3.042708  | -1.568507 | -3.010902 |
| H | 0.222651  | 0.474617  | -2.055438 | H | 3.357490  | -0.666034 | -3.556216 |
| C | 2.155971  | -0.344865 | 3.540719  | H | 3.937297  | -1.974119 | -2.507259 |
| H | 2.486027  | 0.551653  | 4.080059  | H | 2.733712  | -2.308420 | -3.773937 |
| H | 2.153585  | -1.182156 | 4.249781  | S | -0.656696 | -2.932251 | -0.305051 |
| H | 2.872149  | -0.566133 | 2.745384  | C | 1.898392  | -4.573742 | -2.264105 |
| C | -0.308271 | 0.085006  | 4.025770  | C | 2.713727  | -5.780446 | -2.661200 |
| H | -1.304730 | 0.211941  | 3.590948  | C | 3.433542  | -5.587529 | -4.017034 |
| H | -0.341794 | -0.766615 | 4.716024  | C | 2.529297  | -5.793157 | -5.239428 |
| H | -0.079825 | 0.980360  | 4.616652  | C | 1.329113  | -4.839944 | -5.321706 |
| C | 1.688525  | 1.868486  | -2.702522 | C | 0.373223  | -4.922339 | -4.135695 |
| H | 2.523699  | 1.272398  | -2.327225 | H | 2.068684  | -6.668105 | -2.702005 |
| H | 1.547726  | 1.629053  | -3.763657 | H | 3.888989  | -4.589491 | -4.041621 |
| H | 1.949321  | 2.931722  | -2.627600 | H | 2.158735  | -6.828822 | -5.234006 |
| C | -0.799069 | 2.320009  | -2.449578 | H | 1.662244  | -3.799009 | -5.418492 |
| H | -0.664306 | 3.403097  | -2.341260 | H | 3.437188  | -5.929320 | -1.857690 |
| H | -0.943483 | 2.107449  | -3.515849 | H | 4.257822  | -6.308157 | -4.060201 |
| H | -1.722113 | 2.044902  | -1.925828 | H | 3.132041  | -5.686162 | -6.149233 |
| O | 2.005746  | -1.258136 | -2.133801 | H | 0.749882  | -5.071017 | -6.224775 |
| O | 2.585053  | -2.054862 | 0.744090  | H | -0.572155 | -4.425357 | -4.355970 |

|   |          |           |           |   |          |           |           |
|---|----------|-----------|-----------|---|----------|-----------|-----------|
| H | 0.158655 | -5.959596 | -3.851032 | O | 0.847608 | -4.195362 | -2.973952 |
| O | 2.219153 | -3.894992 | -1.288615 |   |          |           |           |

**Table S12.** Cartesian coordinate of S<sup>Pr</sup>AlOMe<sub>2</sub> in state TS1a

| Coordinates (Angstroms) |           |           |           |   |           |           |           |
|-------------------------|-----------|-----------|-----------|---|-----------|-----------|-----------|
| Atom                    | X         | Y         | Z         |   |           |           |           |
|                         |           |           |           | C | 1.594760  | -3.562851 | -0.078340 |
|                         |           |           |           | H | 1.431989  | -4.463823 | -0.661077 |
| Al                      | -1.134049 | 0.874545  | 0.319420  | C | 2.383313  | -3.626856 | 1.070220  |
| N                       | 0.650971  | 0.018257  | -0.128725 | C | 2.583079  | -2.485268 | 1.838529  |
| C                       | 1.283775  | 1.060813  | -0.620709 | H | 3.180706  | -2.547032 | 2.743837  |
| C                       | 2.742915  | 1.176565  | -0.862566 | C | 2.025530  | -1.252126 | 1.475183  |
| C                       | 3.549654  | 0.078303  | -1.211554 | H | 2.830673  | -4.571074 | 1.369959  |
| H                       | 3.114950  | -0.903006 | -1.339378 | C | 2.247319  | -0.035112 | 2.366027  |
| C                       | 4.920404  | 0.235635  | -1.391022 | H | 1.754161  | 0.824530  | 1.909645  |
| H                       | 5.520428  | -0.628979 | -1.664542 | C | 0.150028  | -2.279140 | -1.745475 |
| C                       | 5.542001  | 1.478530  | -1.213278 | H | -0.611502 | -1.514785 | -1.569908 |
| C                       | 4.736915  | 2.569650  | -0.860766 | C | 1.573950  | -0.236558 | 3.735842  |
| H                       | 5.192877  | 3.545043  | -0.708941 | H | 1.998094  | -1.094597 | 4.272227  |
| C                       | 3.362682  | 2.428072  | -0.700755 | H | 1.716754  | 0.654420  | 4.359206  |
| H                       | 2.759144  | 3.285715  | -0.424127 | H | 0.499963  | -0.389268 | 3.602749  |
| C                       | 7.027327  | 1.642548  | -1.422747 | C | 3.743258  | 0.299071  | 2.515395  |
| H                       | 7.248359  | 1.904078  | -2.466258 | H | 4.217915  | 0.457711  | 1.542135  |
| H                       | 7.435382  | 2.440793  | -0.793816 | H | 3.866339  | 1.212586  | 3.109075  |
| H                       | 7.569288  | 0.718161  | -1.196754 | H | 4.285154  | -0.504197 | 3.029524  |
| C                       | 1.257823  | -1.204541 | 0.293506  | C | -0.593077 | -3.587781 | -2.057941 |
| C                       | 1.008458  | -2.360110 | -0.484532 | H | -1.135102 | -3.960535 | -1.181955 |

|   |           |           |           |   |           |           |           |
|---|-----------|-----------|-----------|---|-----------|-----------|-----------|
| H | -1.318354 | -3.418805 | -2.862027 | C | -4.174850 | 0.367803  | -1.567132 |
| H | 0.086673  | -4.378807 | -2.397144 | C | -5.484312 | 1.136925  | -1.840383 |
| C | 0.974941  | -1.830785 | -2.968027 | C | -6.723520 | 0.458952  | -1.236552 |
| H | 1.803001  | -2.525555 | -3.157036 | C | -6.709573 | 0.328794  | 0.293236  |
| H | 0.344607  | -1.803722 | -3.865071 | C | -5.490960 | -0.397050 | 0.861016  |
| H | 1.393478  | -0.830145 | -2.828516 | H | -4.338936 | -0.710329 | -1.661154 |
| O | -2.211025 | -0.585509 | -0.141634 | H | -5.387146 | 2.165529  | -1.469878 |
| O | -0.918143 | 0.954675  | 2.040839  | H | -6.819696 | -0.545211 | -1.675639 |
| C | -1.652579 | 1.730604  | 2.956106  | H | -6.752395 | 1.319409  | 0.763691  |
| H | -1.440392 | 2.806200  | 2.847185  | H | -3.400665 | 0.642019  | -2.285772 |
| H | -2.738660 | 1.591979  | 2.845426  | H | -5.619304 | 1.210099  | -2.925875 |
| H | -1.375376 | 1.441807  | 3.980620  | H | -7.622054 | 1.012800  | -1.535984 |
| C | -2.347031 | -1.738995 | 0.671071  | H | -7.607257 | -0.215072 | 0.616170  |
| H | -2.901180 | -2.513381 | 0.123411  | H | -5.650883 | -0.660058 | 1.909045  |
| H | -1.358911 | -2.134102 | 0.928586  | H | -5.266783 | -1.319054 | 0.312097  |
| H | -2.877060 | -1.499963 | 1.602045  | O | -2.788999 | 1.696752  | -0.097085 |
| S | 0.199563  | 2.403860  | -0.910047 | O | -4.329153 | 0.459806  | 0.900697  |
| C | -3.596106 | 0.699100  | -0.204111 |   |           |           |           |

**Table S13.** Cartesian coordinate of S<sup>Pr</sup>AlOMe<sub>2</sub> in state 2a

| Coordinates (Angstroms) |           |           |           | C | -2.730874 | -1.368700 | -0.746478 |
|-------------------------|-----------|-----------|-----------|---|-----------|-----------|-----------|
| Atom                    | X         | Y         | Z         | C | -3.409406 | -0.251500 | -1.264567 |
| Al                      | 1.128386  | -1.142564 | 0.400563  | H | -2.865666 | 0.649219  | -1.514180 |
| N                       | -0.551529 | -0.300459 | -0.166177 | C | -4.786891 | -0.285492 | -1.455190 |
| C                       | -1.271207 | -1.361368 | -0.497008 | H | -5.287652 | 0.590049  | -1.861303 |

|   |           |           |           |   |           |           |           |
|---|-----------|-----------|-----------|---|-----------|-----------|-----------|
| C | -5.539996 | -1.420068 | -1.123943 | H | -1.640368 | -0.582301 | 4.350035  |
| C | -4.861104 | -2.530588 | -0.604598 | H | -0.313567 | 0.239507  | 3.508925  |
| H | -5.421676 | -3.421587 | -0.332412 | C | -3.641848 | -0.122725 | 2.515374  |
| C | -3.481692 | -2.513502 | -0.428774 | H | -4.151407 | -0.272066 | 1.558351  |
| H | -2.975602 | -3.381837 | -0.021043 | H | -3.848625 | -0.990544 | 3.152494  |
| C | -7.031886 | -1.454816 | -1.346909 | H | -4.082011 | 0.756316  | 3.001164  |
| H | -7.267546 | -1.831595 | -2.351180 | C | 1.245755  | 2.942284  | -2.053306 |
| H | -7.529925 | -2.112992 | -0.627254 | H | 1.865449  | 2.976006  | -1.152315 |
| H | -7.474317 | -0.456747 | -1.261264 | H | 1.892706  | 2.703132  | -2.904933 |
| C | -1.048104 | 0.996009  | 0.175666  | H | 0.837825  | 3.944484  | -2.227501 |
| C | -0.693385 | 2.083620  | -0.652540 | C | -0.750601 | 1.864252  | -3.174967 |
| C | -1.157486 | 3.356600  | -0.304521 | H | -1.309085 | 2.803053  | -3.275380 |
| H | -0.917772 | 4.204586  | -0.939149 | H | -0.138258 | 1.735581  | -4.075464 |
| C | -1.921648 | 3.555723  | 0.842912  | H | -1.472200 | 1.041597  | -3.144212 |
| C | -2.222991 | 2.476665  | 1.667938  | O | 2.127289  | 0.604883  | 0.385305  |
| H | -2.800280 | 2.640985  | 2.573568  | O | 1.088175  | -1.327614 | 2.120610  |
| C | -1.794927 | 1.178952  | 1.360837  | C | 0.925403  | -2.462325 | 2.930719  |
| H | -2.272892 | 4.552158  | 1.097851  | H | 0.336946  | -3.253996 | 2.441612  |
| C | -2.122884 | 0.040669  | 2.321945  | H | 1.899084  | -2.890782 | 3.214645  |
| H | -1.743813 | -0.893689 | 1.904350  | H | 0.400041  | -2.185140 | 3.856519  |
| C | 0.137400  | 1.885609  | -1.915857 | C | 2.339089  | 1.482597  | 1.494549  |
| H | 0.623043  | 0.909246  | -1.840394 | H | 2.957151  | 2.331516  | 1.180253  |
| C | -1.396217 | 0.238676  | 3.665193  | H | 1.351543  | 1.841268  | 1.790045  |
| H | -1.691050 | 1.177931  | 4.148562  | H | 2.806174  | 0.947881  | 2.323764  |

|   |           |           |           |   |          |           |           |
|---|-----------|-----------|-----------|---|----------|-----------|-----------|
| S | -0.323799 | -2.820833 | -0.544723 | H | 6.551980 | -1.253329 | 0.074251  |
| C | 3.302023  | -0.192938 | -0.212227 | H | 2.973085 | 0.635151  | -2.107151 |
| C | 3.816732  | 0.591952  | -1.416093 | H | 5.056367 | 0.240558  | -3.141572 |
| C | 5.030280  | -0.070482 | -2.090088 | H | 7.191293 | -0.130720 | -2.035544 |
| C | 6.373193  | 0.296193  | -1.441302 | H | 7.487085 | 0.206299  | 0.408310  |
| C | 6.527516  | -0.157850 | 0.015958  | H | 5.701649 | 0.168057  | 1.991971  |
| C | 5.414479  | 0.322183  | 0.947754  | H | 5.218905 | 1.395205  | 0.816071  |
| H | 4.046678  | 1.625528  | -1.130126 | O | 2.649458 | -1.326706 | -0.548499 |
| H | 4.883717  | -1.157476 | -2.088532 | O | 4.216482 | -0.451401 | 0.800217  |
| H | 6.497420  | 1.388908  | -1.487675 |   |          |           |           |

**Table S14.** Cartesian coordinate of S<sup>Pr</sup>AlOMe<sub>2</sub> in state TS2a

| Coordinates (Angstroms) |           |           |           | C | -3.421700 | -2.250846 | -1.309137 |
|-------------------------|-----------|-----------|-----------|---|-----------|-----------|-----------|
| Atom                    | X         | Y         | Z         | H | -2.929827 | -3.188283 | -1.071673 |
| Al                      | 0.956422  | -1.009127 | 0.406019  | C | -6.863814 | -1.040750 | -2.428879 |
| N                       | -0.746658 | -0.143128 | 0.051461  | H | -7.084544 | -0.218836 | -3.118065 |
| C                       | -1.312534 | -1.067361 | -0.702228 | H | -7.150090 | -1.980189 | -2.912972 |
| C                       | -2.709296 | -1.047065 | -1.181917 | H | -7.512163 | -0.913725 | -1.551716 |
| C                       | -3.361982 | 0.157209  | -1.497648 | C | -1.391840 | 0.972208  | 0.676035  |
| H                       | -2.833230 | 1.098353  | -1.419424 | C | -1.003551 | 2.268421  | 0.279460  |
| C                       | -4.686728 | 0.149379  | -1.920046 | C | -1.604379 | 3.356839  | 0.921893  |
| H                       | -5.169390 | 1.090649  | -2.171129 | H | -1.330600 | 4.365362  | 0.624486  |
| C                       | -5.410760 | -1.047006 | -2.022466 | C | -2.542684 | 3.168129  | 1.932886  |
| C                       | -4.752663 | -2.244996 | -1.712835 | C | -2.887584 | 1.877829  | 2.325924  |
| H                       | -5.290221 | -3.186740 | -1.790666 | H | -3.603952 | 1.737216  | 3.130521  |

|   |           |           |           |   |           |           |           |
|---|-----------|-----------|-----------|---|-----------|-----------|-----------|
| C | -2.321907 | 0.753051  | 1.714544  | C | 1.914342  | -1.521221 | 3.078515  |
| H | -2.998149 | 4.025808  | 2.420930  | H | 1.988210  | -0.520939 | 3.529749  |
| C | -2.688807 | -0.639240 | 2.216411  | H | 1.594255  | -2.224563 | 3.859602  |
| H | -2.215793 | -1.383611 | 1.572996  | H | 2.917107  | -1.809476 | 2.738259  |
| C | 0.016754  | 2.504870  | -0.829568 | C | 4.265863  | 1.052150  | 2.221262  |
| H | 0.385533  | 1.534617  | -1.171580 | H | 5.145689  | 1.542729  | 1.779255  |
| C | -2.120961 | -0.868182 | 3.629429  | H | 3.879284  | 1.689214  | 3.020538  |
| H | -2.522983 | -0.140567 | 4.344765  | H | 4.569031  | 0.088154  | 2.645986  |
| H | -2.379988 | -1.872789 | 3.984645  | S | -0.234635 | -2.403701 | -1.057659 |
| H | -1.030357 | -0.783375 | 3.612451  | C | 3.463539  | 0.100191  | 0.126286  |
| C | -4.206285 | -0.889961 | 2.155710  | C | 4.309003  | 0.887798  | -0.885222 |
| H | -4.591530 | -0.734294 | 1.142470  | C | 4.615317  | 0.126673  | -2.184465 |
| H | -4.429914 | -1.921141 | 2.452880  | C | 5.832164  | -0.804533 | -2.092268 |
| H | -4.753761 | -0.224764 | 2.833761  | C | 5.691512  | -1.942756 | -1.074449 |
| C | 1.238659  | 3.283983  | -0.311126 | C | 5.387780  | -1.479531 | 0.351803  |
| H | 1.751502  | 2.725363  | 0.476799  | H | 5.238283  | 1.238129  | -0.420496 |
| H | 1.951560  | 3.447433  | -1.128721 | H | 3.722435  | -0.437719 | -2.478199 |
| H | 0.954098  | 4.268058  | 0.080817  | H | 6.717111  | -0.204160 | -1.830560 |
| C | -0.624207 | 3.213956  | -2.037557 | H | 4.890369  | -2.629806 | -1.376104 |
| H | -1.002415 | 4.206587  | -1.765227 | H | 3.709880  | 1.776409  | -1.099779 |
| H | 0.113778  | 3.344408  | -2.837693 | H | 4.800184  | 0.858566  | -2.980942 |
| H | -1.462304 | 2.637366  | -2.445936 | H | 6.035395  | -1.233768 | -3.082126 |
| O | 3.207421  | 0.901185  | 1.290988  | H | 6.623297  | -2.525370 | -1.055443 |
| O | 0.977483  | -1.538619 | 2.030164  | H | 5.566346  | -2.298055 | 1.056687  |

|   |          |           |           |   |          |           |          |
|---|----------|-----------|-----------|---|----------|-----------|----------|
| H | 6.048126 | -0.649922 | 0.643274  | O | 4.014608 | -1.144835 | 0.553408 |
| O | 2.240175 | -0.157317 | -0.416602 |   |          |           |          |

**Table S15.** Cartesian coordinate of S<sup>Pr</sup>AlOMe<sub>2</sub> in state 3a

| Coordinates (Angstroms) |           |           |           |   |           |           |           |
|-------------------------|-----------|-----------|-----------|---|-----------|-----------|-----------|
| Atom                    | X         | Y         | Z         |   |           |           |           |
|                         |           |           |           | C | -1.985338 | 3.389349  | -1.198158 |
|                         |           |           |           | H | -1.895246 | 4.060432  | -2.048003 |
| Al                      | 1.323173  | -0.068734 | 0.638089  | C | -2.858874 | 3.704842  | -0.161083 |
| N                       | -0.536462 | 0.193484  | 0.003777  | C | -2.967205 | 2.853221  | 0.934558  |
| C                       | -0.948727 | -1.051609 | -0.041787 | H | -3.638030 | 3.112269  | 1.749064  |
| C                       | -2.329991 | -1.504285 | -0.308941 | C | -2.221361 | 1.671634  | 1.018790  |
| C                       | -3.176415 | -0.806288 | -1.187330 | H | -3.448668 | 4.616883  | -0.202772 |
| H                       | -2.814411 | 0.071670  | -1.706694 | C | -2.343756 | 0.796951  | 2.261547  |
| C                       | -4.483429 | -1.234210 | -1.393145 | H | -1.716124 | -0.086959 | 2.132415  |
| H                       | -5.120936 | -0.682138 | -2.079430 | C | -0.271376 | 1.899689  | -2.319673 |
| C                       | -4.995641 | -2.355894 | -0.725799 | H | 0.202773  | 0.936728  | -2.116645 |
| C                       | -4.146298 | -3.048728 | 0.147244  | C | -1.799463 | 1.533509  | 3.499258  |
| H                       | -4.521186 | -3.918737 | 0.680756  | H | -2.367926 | 2.448963  | 3.703848  |
| C                       | -2.831002 | -2.641152 | 0.345253  | H | -1.868779 | 0.888709  | 4.383930  |
| H                       | -2.189649 | -3.186867 | 1.029425  | H | -0.748937 | 1.792860  | 3.342773  |
| C                       | -6.411431 | -2.819828 | -0.965578 | C | -3.789246 | 0.310465  | 2.474331  |
| H                       | -6.459197 | -3.499269 | -1.827045 | H | -4.163736 | -0.222221 | 1.594125  |
| H                       | -6.808750 | -3.360916 | -0.100590 | H | -3.836384 | -0.370400 | 3.332512  |
| H                       | -7.078596 | -1.977802 | -1.178389 | H | -4.468091 | 1.147110  | 2.678429  |
| C                       | -1.359082 | 1.364339  | -0.055291 | C | 0.858201  | 2.940645  | -2.416580 |
| C                       | -1.216496 | 2.220712  | -1.166741 | H | 1.439834  | 2.963104  | -1.491846 |



|   |           |           |           |   |          |           |           |
|---|-----------|-----------|-----------|---|----------|-----------|-----------|
| H | 1.541554  | 2.680508  | -3.233820 | C | 4.317465 | -0.274498 | -1.569231 |
| H | 0.460550  | 3.943972  | -2.613629 | C | 3.788818 | -1.637419 | -2.042576 |
| C | -1.027741 | 1.771803  | -3.655437 | C | 4.376983 | -2.836011 | -1.280100 |
| H | -1.509783 | 2.714766  | -3.939414 | C | 3.939521 | -2.960028 | 0.185274  |
| H | -0.334033 | 1.497808  | -4.459092 | C | 4.209011 | -1.727429 | 1.041872  |
| H | -1.806159 | 1.001125  | -3.606445 | H | 5.386380 | -0.345578 | -1.335289 |
| O | 4.164493  | 1.501021  | 0.097071  | H | 2.694213 | -1.643457 | -1.978901 |
| O | 1.185691  | 0.634375  | 2.212192  | H | 5.475326 | -2.777090 | -1.323240 |
| C | 2.197420  | 0.927447  | 3.139976  | H | 2.871497 | -3.194586 | 0.238976  |
| H | 2.743523  | 0.026547  | 3.467194  | H | 4.217668 | 0.473330  | -2.362170 |
| H | 2.936693  | 1.635030  | 2.734713  | H | 4.039822 | -1.753014 | -3.103888 |
| H | 1.749141  | 1.383032  | 4.034278  | H | 4.099730 | -3.761579 | -1.800140 |
| C | 5.363059  | 1.365446  | 0.842715  | H | 4.469104 | -3.803297 | 0.650290  |
| H | 6.149363  | 0.826612  | 0.294450  | H | 4.021116 | -1.939920 | 2.098762  |
| H | 5.712823  | 2.381646  | 1.038733  | H | 5.250062 | -1.400059 | 0.943985  |
| H | 5.180014  | 0.862082  | 1.800052  | O | 2.269786 | 0.645276  | -0.708496 |
| S | 0.342834  | -2.189951 | 0.309702  | O | 3.343018 | -0.617715 | 0.738303  |
| C | 3.547516  | 0.340267  | -0.399815 |   |          |           |           |

**Table S16.** Cartesian coordinate of S<sup>Pr</sup>AlOMe<sub>2</sub> in state TS3a

| Coordinates (Angstroms) |           |           |           | C | -2.466315 | -1.215660 | -0.650417 |
|-------------------------|-----------|-----------|-----------|---|-----------|-----------|-----------|
| Atom                    | X         | Y         | Z         | C | -3.196871 | -0.189987 | -1.274726 |
| Al                      | 1.325213  | -0.645575 | 0.682580  | H | -2.708313 | 0.732266  | -1.557693 |
| N                       | -0.412243 | 0.033322  | 0.016407  | C | -4.556387 | -0.343422 | -1.526976 |
| C                       | -1.026127 | -1.080419 | -0.331134 | H | -5.099092 | 0.462855  | -2.014547 |

|   |           |           |           |   |           |           |           |
|---|-----------|-----------|-----------|---|-----------|-----------|-----------|
| C | -5.239413 | -1.508656 | -1.153741 | H | -1.719838 | 0.004348  | 4.478444  |
| C | -4.507845 | -2.527835 | -0.529426 | H | -0.443181 | 0.919066  | 3.655412  |
| H | -5.014413 | -3.439817 | -0.222823 | C | -3.642063 | 0.134665  | 2.499438  |
| C | -3.143932 | -2.393349 | -0.292526 | H | -4.069664 | -0.138594 | 1.529514  |
| H | -2.595814 | -3.192081 | 0.195485  | H | -3.811382 | -0.696369 | 3.194397  |
| C | -6.711710 | -1.672308 | -1.441595 | H | -4.194564 | 1.002044  | 2.880710  |
| H | -6.869043 | -2.128566 | -2.428138 | C | 1.314403  | 3.123509  | -1.942578 |
| H | -7.195337 | -2.319834 | -0.702648 | H | 1.886493  | 3.071013  | -1.013246 |
| H | -7.230249 | -0.707741 | -1.442408 | H | 1.986005  | 2.888769  | -2.777950 |
| C | -1.030570 | 1.308484  | 0.226529  | H | 0.963638  | 4.153087  | -2.081083 |
| C | -0.746647 | 2.344800  | -0.688702 | C | -0.664241 | 2.181212  | -3.217716 |
| C | -1.337621 | 3.594343  | -0.474068 | H | -1.146712 | 3.157789  | -3.344477 |
| H | -1.145177 | 4.401238  | -1.176063 | H | -0.007260 | 2.016859  | -4.080560 |
| C | -2.167298 | 3.818919  | 0.621487  | H | -1.446267 | 1.414459  | -3.242915 |
| C | -2.411054 | 2.789664  | 1.525776  | O | 4.059277  | 0.686623  | 1.459246  |
| H | -3.047166 | 2.974112  | 2.387075  | O | 1.043019  | -0.693428 | 2.390395  |
| C | -1.851802 | 1.517357  | 1.355206  | C | 1.859997  | -1.217982 | 3.400908  |
| H | -2.617602 | 4.796481  | 0.773394  | H | 2.037765  | -2.300073 | 3.279800  |
| C | -2.134762 | 0.430830  | 2.386965  | H | 2.841895  | -0.719800 | 3.440573  |
| H | -1.636694 | -0.488429 | 2.074692  | H | 1.373476  | -1.072431 | 4.376408  |
| C | 0.143946  | 2.125685  | -1.907216 | C | 5.314996  | 0.076934  | 1.762959  |
| H | 0.573719  | 1.124425  | -1.826465 | H | 6.145991  | 0.575938  | 1.251762  |
| C | -1.525656 | 0.802127  | 3.751186  | H | 5.439466  | 0.186147  | 2.841176  |
| H | -1.955758 | 1.730890  | 4.146176  | H | 5.289914  | -0.985874 | 1.505160  |

|   |          |           |           |   |          |           |           |
|---|----------|-----------|-----------|---|----------|-----------|-----------|
| S | 0.039671 | -2.459130 | -0.321574 | H | 2.223351 | -2.150297 | -2.118302 |
| C | 3.506360 | 0.502784  | 0.237715  | H | 4.615102 | 1.744157  | -0.983878 |
| C | 4.408023 | 0.664863  | -0.968147 | H | 4.232168 | 0.871852  | -3.089994 |
| C | 3.809740 | 0.224944  | -2.311842 | H | 3.890386 | -1.349222 | -3.771206 |
| C | 4.098398 | -1.235283 | -2.699350 | H | 3.536672 | -3.288627 | -2.382756 |
| C | 3.295290 | -2.306692 | -1.951362 | H | 3.042279 | -3.299344 | -0.052111 |
| C | 3.540404 | -2.403095 | -0.445211 | H | 4.616146 | -2.515171 | -0.243152 |
| H | 5.366654 | 0.165257  | -0.800809 | O | 2.281744 | 0.897803  | 0.168555  |
| H | 2.730928 | 0.414897  | -2.306696 | O | 3.057165 | -1.294730 | 0.302434  |
| H | 5.175174 | -1.430860 | -2.578556 |   |          |           |           |

**Table S17.** Cartesian coordinate of S<sup>Pr</sup>AlOMe<sub>2</sub> in state 4a

| Coordinates (Angstroms) |           |           |           | C | -3.707481 | -2.424209 | 0.201144  |
|-------------------------|-----------|-----------|-----------|---|-----------|-----------|-----------|
| Atom                    | X         | Y         | Z         | H | -3.267450 | -3.205884 | 0.811092  |
| Al                      | 0.997867  | -1.299434 | 0.597963  | C | -7.169075 | -1.374723 | -1.014994 |
| N                       | -0.630455 | -0.415688 | 0.007973  | H | -7.419517 | -1.929164 | -1.929215 |
| C                       | -1.426313 | -1.465208 | -0.088130 | H | -7.714756 | -1.842997 | -0.189427 |
| C                       | -2.879188 | -1.434621 | -0.355926 | H | -7.545622 | -0.354080 | -1.139951 |
| C                       | -3.474165 | -0.424089 | -1.133638 | C | -1.026728 | 0.959926  | 0.018882  |
| H                       | -2.867564 | 0.354263  | -1.576357 | C | -0.538858 | 1.787422  | -1.017606 |
| C                       | -4.848761 | -0.413605 | -1.341731 | C | -0.921689 | 3.131884  | -1.011324 |
| H                       | -5.286118 | 0.373663  | -1.950691 | H | -0.575559 | 3.793052  | -1.798489 |
| C                       | -5.680224 | -1.388747 | -0.772853 | C | -1.733154 | 3.643322  | 0.000862  |
| C                       | -5.083560 | -2.390600 | 0.004435  | C | -2.155734 | 2.818597  | 1.037588  |
| H                       | -5.705898 | -3.155019 | 0.462777  | H | -2.756242 | 3.234359  | 1.841601  |

|   |           |           |           |   |           |           |           |
|---|-----------|-----------|-----------|---|-----------|-----------|-----------|
| C | -1.809909 | 1.461792  | 1.077454  | C | 2.441169  | -0.789656 | 2.985268  |
| H | -2.018237 | 4.691967  | -0.010735 | H | 3.354943  | -0.824632 | 2.374028  |
| C | -2.231194 | 0.613469  | 2.272363  | H | 2.486342  | 0.113680  | 3.608359  |
| H | -1.956545 | -0.426244 | 2.083376  | H | 2.445083  | -1.660955 | 3.656708  |
| C | 0.355650  | 1.211483  | -2.112809 | C | 8.057030  | -3.448299 | -3.656661 |
| H | 1.025199  | 0.484765  | -1.639353 | H | 7.894985  | -2.743014 | -4.480198 |
| C | -1.451870 | 1.044160  | 3.529656  | H | 8.903071  | -4.092775 | -3.902427 |
| H | -1.646939 | 2.094213  | 3.778717  | H | 7.161771  | -4.068488 | -3.529944 |
| H | -1.749870 | 0.430729  | 4.388423  | S | -0.582076 | -2.981979 | 0.192439  |
| H | -0.377745 | 0.910320  | 3.369568  | C | 7.586890  | -1.878987 | -1.854964 |
| C | -3.753209 | 0.644160  | 2.498913  | C | 6.253934  | -1.589606 | -2.529212 |
| H | -4.294692 | 0.328895  | 1.600926  | C | 5.415671  | -0.576963 | -1.745406 |
| H | -4.024303 | -0.031953 | 3.317888  | C | 4.111596  | -0.180900 | -2.452100 |
| H | -4.101596 | 1.647198  | 2.771588  | C | 3.140870  | -1.337427 | -2.742298 |
| C | 1.249712  | 2.259283  | -2.791353 | C | 2.773479  | -2.155706 | -1.500899 |
| H | 1.808144  | 2.848063  | -2.055765 | H | 5.710755  | -2.535488 | -2.653354 |
| H | 1.973259  | 1.758464  | -3.443340 | H | 5.194538  | -0.982316 | -0.752426 |
| H | 0.671461  | 2.950960  | -3.415845 | H | 4.346099  | 0.330392  | -3.397273 |
| C | -0.468920 | 0.450903  | -3.170685 | H | 2.223318  | -0.925249 | -3.181208 |
| H | -1.199021 | 1.118226  | -3.645334 | H | 6.442973  | -1.223677 | -3.549009 |
| H | 0.185606  | 0.055613  | -3.956399 | H | 6.023224  | 0.317519  | -1.570253 |
| H | -1.009905 | -0.394186 | -2.735248 | H | 3.594674  | 0.548943  | -1.820127 |
| O | 8.420745  | -2.783196 | -2.446406 | H | 3.560035  | -2.021727 | -3.494171 |
| O | 1.267140  | -0.762411 | 2.203048  | H | 1.993754  | -2.887141 | -1.766313 |

|   |          |           |           |   |          |           |           |
|---|----------|-----------|-----------|---|----------|-----------|-----------|
| H | 3.649825 | -2.733544 | -1.167799 | O | 2.359781 | -1.315803 | -0.447039 |
| O | 7.949101 | -1.354839 | -0.829615 |   |          |           |           |

**Table S18.** Cartesian coordinate of [O<sup>Pr</sup>AlOMe<sub>2</sub>]<sub>2</sub>

| Coordinates (Angstroms) |          |          |          |    |           |          |           |
|-------------------------|----------|----------|----------|----|-----------|----------|-----------|
| Atom                    | X        | Y        | Z        |    |           |          |           |
|                         |          |          |          | C  | 4.337723  | 1.342381 | 3.305595  |
|                         |          |          |          | H  | 3.891293  | 0.633210 | 3.996995  |
| Al                      | 0.473616 | 6.140570 | 0.692281 | C  | 5.720863  | 1.361247 | 3.138262  |
| N                       | 3.268837 | 3.999714 | 0.939598 | C  | 6.299269  | 2.262791 | 2.249541  |
| C                       | 3.064569 | 5.264583 | 1.240045 | H  | 7.377881  | 2.270341 | 2.118954  |
| C                       | 3.728605 | 6.037743 | 2.319074 | C  | 5.514605  | 3.158792 | 1.513106  |
| C                       | 4.134136 | 5.503999 | 3.553119 | Al | 2.457551  | 3.347005 | -0.694621 |
| H                       | 3.957341 | 4.464164 | 3.788088 | N  | -0.337817 | 5.487805 | -0.941853 |
| C                       | 4.750477 | 6.318281 | 4.498702 | C  | -0.133334 | 4.222973 | -1.242261 |
| H                       | 5.041552 | 5.890108 | 5.454454 | C  | -0.796986 | 3.449601 | -2.321362 |
| C                       | 5.002232 | 7.673698 | 4.244773 | C  | -1.203057 | 3.983310 | -3.555252 |
| C                       | 4.587527 | 8.202088 | 3.013889 | H  | -1.027079 | 5.023324 | -3.790022 |
| H                       | 4.761170 | 9.252667 | 2.795178 | C  | -1.818880 | 3.168778 | -4.500955 |
| C                       | 3.949676 | 7.404706 | 2.070484 | H  | -2.110376 | 3.596954 | -5.456577 |
| H                       | 3.624627 | 7.828263 | 1.126702 | C  | -2.069565 | 1.813106 | -4.247324 |
| C                       | 5.717200 | 8.533231 | 5.257457 | C  | -1.654332 | 1.284753 | -3.016602 |
| H                       | 5.522367 | 8.194370 | 6.280135 | H  | -1.827137 | 0.233989 | -2.798115 |
| H                       | 5.414549 | 9.582403 | 5.178235 | C  | -1.017009 | 2.082406 | -2.073073 |
| H                       | 6.803358 | 8.493259 | 5.101280 | H  | -0.691544 | 1.658866 | -1.129428 |
| C                       | 4.122042 | 3.126298 | 1.708270 | C  | -2.783959 | 0.953263 | -5.260146 |
| C                       | 3.509826 | 2.221165 | 2.598633 | H  | -2.589398 | 1.292457 | -6.282766 |

|   |           |           |           |   |           |          |           |
|---|-----------|-----------|-----------|---|-----------|----------|-----------|
| H | -2.480570 | -0.095711 | -5.181133 | C | 1.627572  | 2.420913 | 4.286530  |
| H | -3.870140 | 0.992447  | -5.103925 | H | 0.539072  | 2.397794 | 4.408879  |
| C | -1.191099 | 6.361135  | -1.710536 | H | 2.050690  | 1.648601 | 4.939486  |
| C | -0.578966 | 7.266245  | -2.600984 | H | 1.982548  | 3.396311 | 4.637174  |
| C | -1.406930 | 8.145006  | -3.307896 | C | 1.400755  | 0.871370 | 2.282360  |
| H | -0.960563 | 8.854168  | -3.999345 | H | 0.307504  | 0.890257 | 2.371348  |
| C | -2.790054 | 8.126133  | -3.140445 | H | 1.669337  | 0.729036 | 1.231724  |
| C | -3.368379 | 7.224586  | -2.251676 | H | 1.770779  | 0.011062 | 2.854015  |
| H | -4.446981 | 7.217026  | -2.121006 | C | -3.246988 | 5.370582 | -0.534573 |
| C | -2.583645 | 6.328615  | -1.515278 | H | -2.473271 | 4.736634 | -0.094936 |
| H | -3.415767 | 8.815967  | -3.700546 | C | 0.931666  | 7.298922 | -2.813126 |
| H | 6.346520  | 0.671407  | 3.698416  | H | 1.379977  | 6.480093 | -2.244491 |
| C | 6.178048  | 4.116815  | 0.532443  | C | -3.906472 | 6.144440 | 0.621891  |
| H | 5.404403  | 4.750877  | 0.092846  | H | -4.716814 | 6.787058 | 0.258176  |
| C | 6.837416  | 3.342932  | -0.624073 | H | -4.331306 | 5.449403 | 1.355946  |
| H | 7.262293  | 4.037945  | -1.358125 | H | -3.175846 | 6.782403 | 1.131645  |
| H | 7.647706  | 2.700223  | -0.260403 | C | -4.249671 | 4.435808 | -1.235415 |
| H | 6.106703  | 2.705056  | -1.133811 | H | -3.765785 | 3.873958 | -2.041211 |
| C | 7.180854  | 5.051435  | 1.233310  | H | -4.665916 | 3.719313 | -0.517426 |
| H | 7.597183  | 5.767899  | 0.515338  | H | -5.085933 | 4.997451 | -1.667879 |
| H | 6.697045  | 5.613325  | 2.039121  | C | 1.530213  | 8.616067 | -2.285278 |
| H | 8.017052  | 4.489677  | 1.665750  | H | 1.261821  | 8.758576 | -1.234620 |
| C | 1.999170  | 2.188437  | 2.810571  | H | 2.623449  | 8.597125 | -2.374455 |
| H | 1.550908  | 3.007375  | 2.242052  | H | 1.160124  | 9.476291 | -2.857015 |

|   |          |           |           |   |           |          |           |
|---|----------|-----------|-----------|---|-----------|----------|-----------|
| C | 1.303035 | 7.066094  | -4.289096 | H | 3.806428  | 5.595336 | -3.344978 |
| H | 0.879897 | 7.838307  | -4.942155 | H | 3.943032  | 5.978931 | -1.618909 |
| H | 2.391519 | 7.089080  | -4.411610 | H | 4.874152  | 4.627160 | -2.315920 |
| H | 0.947915 | 6.090655  | -4.639479 | C | -0.975044 | 4.336223 | 2.343313  |
| O | 0.046292 | 7.814365  | 0.700035  | H | -0.875207 | 3.892269 | 3.342673  |
| O | 0.107753 | 5.196950  | 2.098544  | H | -1.943019 | 4.860418 | 2.313686  |
| O | 2.885006 | 1.673276  | -0.702693 | H | -1.011760 | 3.508794 | 1.616575  |
| O | 2.823348 | 4.290865  | -2.100724 | C | 0.286020  | 8.732039 | 1.742266  |
| C | 2.646654 | 0.755860  | -1.745447 | H | -0.056463 | 9.730643 | 1.437643  |
| H | 3.181917 | 1.029324  | -2.667958 | H | -0.251389 | 8.461015 | 2.664246  |
| H | 2.992559 | -0.241988 | -1.442228 | H | 1.356447  | 8.809135 | 1.993097  |
| H | 1.576100 | 0.675822  | -1.994802 | O | 0.665873  | 3.548590 | -0.460694 |
| C | 3.906226 | 5.151453  | -2.345584 | O | 2.265381  | 5.939218 | 0.458703  |

**Table S19.** Cartesian coordinate of  $[\text{O}^{\text{Pr}}\text{AlOMe}_2]_2$  in state 1c

| Coordinates (Angstroms) |           |           |           | C | -5.542932 | 2.761907  | 0.495321  |
|-------------------------|-----------|-----------|-----------|---|-----------|-----------|-----------|
| Atom                    | X         | Y         | Z         | H | -5.881569 | 3.579739  | 1.127123  |
| Al                      | -0.591994 | 2.213912  | -0.138348 | C | -4.340028 | 2.127018  | 0.786275  |
| N                       | -2.245864 | -0.813644 | 0.337384  | H | -3.739591 | 2.455985  | 1.627070  |
| C                       | -2.574263 | 0.448516  | 0.397631  | C | -7.633873 | 3.044830  | -0.908439 |
| C                       | -3.881821 | 1.055321  | 0.000065  | H | -7.855761 | 3.028392  | -1.980777 |
| C                       | -4.650206 | 0.665681  | -1.107684 | H | -7.638420 | 4.087879  | -0.574392 |
| H                       | -4.320398 | -0.139044 | -1.748441 | H | -8.460747 | 2.534549  | -0.396575 |
| C                       | -5.840623 | 1.325175  | -1.404461 | C | -3.124946 | -1.772363 | -0.285015 |
| H                       | -6.410481 | 1.015915  | -2.277396 | C | -2.850830 | -2.159874 | -1.612541 |
| C                       | -6.317275 | 2.371968  | -0.605458 | C | -3.685472 | -3.116150 | -2.199695 |

|    |           |           |           |   |           |           |           |
|----|-----------|-----------|-----------|---|-----------|-----------|-----------|
| H  | -3.493678 | -3.431228 | -3.221942 | C | 3.262952  | 4.029374  | 2.232177  |
| C  | -4.753313 | -3.672167 | -1.497480 | H | 3.413245  | 4.346943  | 3.259889  |
| C  | -4.996919 | -3.278052 | -0.185079 | C | 3.991163  | 4.641261  | 1.212270  |
| H  | -5.823427 | -3.721555 | 0.363832  | C | 3.795925  | 4.255990  | -0.110388 |
| C  | -4.188714 | -2.325246 | 0.446183  | H | 4.356373  | 4.746548  | -0.901616 |
| Al | -0.478066 | -1.490963 | 1.115006  | C | 2.878395  | 3.251706  | -0.443153 |
| N  | 1.189495  | 1.629087  | 0.308438  | H | 4.705469  | 5.425178  | 1.450700  |
| C  | 1.472434  | 0.354001  | 0.122796  | H | -5.390968 | -4.414029 | -1.971675 |
| C  | 2.847415  | -0.214320 | 0.018520  | C | -4.439942 | -1.949636 | 1.899614  |
| C  | 3.966238  | 0.252514  | 0.724687  | H | -3.788472 | -1.109571 | 2.151489  |
| H  | 3.878037  | 1.080527  | 1.414124  | C | -4.040326 | -3.116784 | 2.821242  |
| C  | 5.207260  | -0.361686 | 0.560111  | H | -4.148550 | -2.834353 | 3.876132  |
| H  | 6.058620  | 0.008583  | 1.126555  | H | -4.671906 | -3.995045 | 2.639054  |
| C  | 5.377553  | -1.438541 | -0.318454 | H | -2.999850 | -3.400657 | 2.633359  |
| C  | 4.253903  | -1.901282 | -1.018004 | C | -5.884965 | -1.484472 | 2.145424  |
| H  | 4.353900  | -2.747222 | -1.693578 | H | -6.008523 | -1.160929 | 3.186066  |
| C  | 3.008657  | -1.310458 | -0.846750 | H | -6.140874 | -0.643505 | 1.491382  |
| H  | 2.140653  | -1.698104 | -1.366926 | H | -6.607906 | -2.288216 | 1.962580  |
| C  | 6.729960  | -2.078469 | -0.517709 | C | -1.681684 | -1.570673 | -2.396201 |
| H  | 7.396945  | -1.884486 | 0.328931  | H | -1.263815 | -0.736821 | -1.830523 |
| H  | 6.643348  | -3.163494 | -0.643747 | C | -2.113261 | -0.989642 | -3.753628 |
| H  | 7.220728  | -1.686439 | -1.418154 | H | -1.254874 | -0.515501 | -4.243070 |
| C  | 2.173268  | 2.636492  | 0.604812  | H | -2.502701 | -1.759973 | -4.430489 |
| C  | 2.338451  | 3.017871  | 1.953138  | H | -2.886070 | -0.223185 | -3.629961 |



|   |           |           |           |   |           |           |           |
|---|-----------|-----------|-----------|---|-----------|-----------|-----------|
| C | -0.566646 | -2.618799 | -2.572099 | O | -0.606473 | 3.904014  | 0.225085  |
| H | 0.301837  | -2.170104 | -3.070893 | O | -0.921295 | 1.759232  | -1.780916 |
| H | -0.253166 | -3.012309 | -1.601167 | O | -1.025477 | -3.115106 | 0.833667  |
| H | -0.909806 | -3.463034 | -3.183795 | O | -0.343964 | -0.802869 | 2.720083  |
| C | 2.643551  | 2.876684  | -1.901024 | C | -0.500357 | -4.394219 | 1.007208  |
| H | 1.930757  | 2.048982  | -1.936980 | H | -0.159670 | -4.579268 | 2.041808  |
| C | 1.527704  | 2.364576  | 3.069016  | H | -1.276054 | -5.140579 | 0.781176  |
| H | 1.111837  | 1.423818  | 2.694764  | H | 0.358836  | -4.586807 | 0.345589  |
| C | 1.990218  | 4.049064  | -2.656661 | C | -1.332783 | -0.325816 | 3.594186  |
| H | 2.658839  | 4.917648  | -2.698657 | H | -0.859299 | 0.027890  | 4.523396  |
| H | 1.750679  | 3.754206  | -3.685200 | H | -1.889606 | 0.519473  | 3.168257  |
| H | 1.064477  | 4.356836  | -2.159318 | H | -2.055093 | -1.109804 | 3.874298  |
| C | 3.935295  | 2.397919  | -2.586424 | C | -1.602722 | 2.522171  | -2.744945 |
| H | 4.370522  | 1.546303  | -2.051885 | H | -1.262330 | 2.241458  | -3.751875 |
| H | 3.725266  | 2.086201  | -3.616384 | H | -2.690067 | 2.345749  | -2.700852 |
| H | 4.689146  | 3.193290  | -2.627551 | H | -1.435449 | 3.605034  | -2.626487 |
| C | 0.337187  | 3.260531  | 3.465333  | C | -1.719188 | 4.738854  | 0.419895  |
| H | -0.269203 | 3.508319  | 2.591139  | H | -1.474879 | 5.764468  | 0.109105  |
| H | -0.293969 | 2.750782  | 4.203026  | H | -2.607539 | 4.421621  | -0.150670 |
| H | 0.692822  | 4.201102  | 3.904948  | H | -2.010244 | 4.775547  | 1.482979  |
| C | 2.380471  | 2.023214  | 4.302491  | C | 2.223934  | -2.813391 | 2.268571  |
| H | 2.708205  | 2.922583  | 4.837273  | C | 2.199432  | -2.331117 | 3.697817  |
| H | 1.792730  | 1.420767  | 5.005217  | C | 3.448409  | -1.500171 | 4.066903  |
| H | 3.274490  | 1.452404  | 4.029663  | C | 4.704982  | -2.328601 | 4.358295  |

|   |          |           |          |   |           |           |           |
|---|----------|-----------|----------|---|-----------|-----------|-----------|
| C | 5.169868 | -3.210535 | 3.192245 | H | 5.521260  | -1.652774 | 4.642797  |
| C | 4.141536 | -4.244204 | 2.739869 | H | 6.076772  | -3.753248 | 3.489464  |
| H | 2.104087 | -3.190533 | 4.375374 | H | 4.611388  | -5.016384 | 2.127455  |
| H | 3.648479 | -0.785964 | 3.259959 | H | 3.656291  | -4.735603 | 3.592627  |
| H | 4.515212 | -2.969239 | 5.232364 | O | 1.450825  | -2.404859 | 1.413135  |
| H | 5.433169 | -2.595645 | 2.322848 | O | 3.135938  | -3.700360 | 1.854585  |
| H | 1.294549 | -1.723226 | 3.771641 | O | -1.720611 | 1.293550  | 0.926795  |
| H | 3.199382 | -0.904517 | 4.951471 | O | 0.483204  | -0.455343 | -0.084981 |

**Table S20.** Cartesian coordinate of [O<sup>Pr</sup>AlOMe<sub>2</sub>]<sub>2</sub> in state TS1c

| Coordinates (Angstroms) |           |           |           | C  | -7.549560 | 2.755457  | -0.031884 |
|-------------------------|-----------|-----------|-----------|----|-----------|-----------|-----------|
| Atom                    | X         | Y         | Z         | H  | -7.437980 | 3.692050  | -0.594382 |
| Al                      | -0.498307 | 2.159200  | 0.314779  | H  | -7.975394 | 3.010652  | 0.944293  |
| N                       | -1.970548 | -1.043373 | 0.246786  | H  | -8.275498 | 2.137238  | -0.570596 |
| C                       | -2.348120 | 0.169188  | 0.557865  | C  | -2.786818 | -1.897571 | -0.582076 |
| C                       | -3.699414 | 0.772174  | 0.337335  | C  | -2.535486 | -1.910780 | -1.970209 |
| C                       | -4.539387 | 0.515037  | -0.758566 | C  | -3.308054 | -2.761313 | -2.767665 |
| H                       | -4.234226 | -0.166824 | -1.538047 | H  | -3.131021 | -2.786234 | -3.839543 |
| C                       | -5.772501 | 1.153914  | -0.865824 | C  | -4.291724 | -3.577619 | -2.213735 |
| H                       | -6.398300 | 0.946084  | -1.730481 | C  | -4.512759 | -3.555205 | -0.840118 |
| C                       | -6.221500 | 2.052666  | 0.109734  | H  | -5.272359 | -4.201357 | -0.409100 |
| C                       | -5.383014 | 2.303063  | 1.203563  | C  | -3.767806 | -2.718290 | -0.001251 |
| H                       | -5.704007 | 2.994464  | 1.979252  | Al | -0.139910 | -1.709073 | 0.849662  |
| C                       | -4.140739 | 1.687062  | 1.309999  | N  | 1.378689  | 1.669465  | 0.300107  |
| H                       | -3.497232 | 1.907514  | 2.153736  | C  | 1.647528  | 0.410160  | -0.004987 |

|   |           |           |           |   |           |           |           |
|---|-----------|-----------|-----------|---|-----------|-----------|-----------|
| C | 2.988980  | -0.166765 | -0.272672 | C | -3.987562 | -2.747488 | 1.503115  |
| C | 4.186684  | 0.342847  | 0.251219  | H | -3.483137 | -1.878059 | 1.928634  |
| H | 4.181285  | 1.218101  | 0.884755  | C | -3.324724 | -4.003386 | 2.100871  |
| C | 5.399372  | -0.275822 | -0.037139 | H | -3.414189 | -4.010784 | 3.195011  |
| H | 6.314446  | 0.128340  | 0.388978  | H | -3.804804 | -4.912105 | 1.717554  |
| C | 5.463446  | -1.402030 | -0.868050 | H | -2.265630 | -4.041096 | 1.826030  |
| C | 4.263079  | -1.907260 | -1.386537 | C | -5.469222 | -2.634239 | 1.896254  |
| H | 4.282660  | -2.786280 | -2.026108 | H | -5.567880 | -2.569610 | 2.986678  |
| C | 3.045133  | -1.309584 | -1.087945 | H | -5.922917 | -1.739105 | 1.456169  |
| H | 2.125713  | -1.720769 | -1.486053 | H | -6.048698 | -3.504685 | 1.567667  |
| C | 6.786382  | -2.038620 | -1.216463 | C | -1.453813 | -1.044122 | -2.605323 |
| H | 6.688328  | -3.122156 | -1.342961 | H | -1.063773 | -0.360883 | -1.852237 |
| H | 7.176986  | -1.635015 | -2.160170 | C | -1.991983 | -0.158424 | -3.741372 |
| H | 7.539646  | -1.850498 | -0.444299 | H | -1.194300 | 0.499270  | -4.105176 |
| C | 2.351939  | 2.729004  | 0.212752  | H | -2.357736 | -0.748459 | -4.590737 |
| C | 2.803639  | 3.346744  | 1.396969  | H | -2.809648 | 0.480438  | -3.391208 |
| C | 3.741296  | 4.378686  | 1.283835  | C | -0.283314 | -1.922368 | -3.085062 |
| H | 4.111870  | 4.860535  | 2.184490  | H | 0.545031  | -1.295353 | -3.438259 |
| C | 4.205520  | 4.798222  | 0.039880  | H | 0.071019  | -2.555897 | -2.266596 |
| C | 3.720947  | 4.196412  | -1.117193 | H | -0.589862 | -2.576610 | -3.911159 |
| H | 4.072106  | 4.539186  | -2.086538 | C | 2.250639  | 2.560840  | -2.360903 |
| C | 2.781312  | 3.159955  | -1.061190 | H | 1.523806  | 1.781983  | -2.123482 |
| H | 4.936432  | 5.599851  | -0.027244 | C | 2.331311  | 2.905500  | 2.777379  |
| H | -4.880326 | -4.232884 | -2.850772 | H | 1.571979  | 2.130030  | 2.640439  |

|   |           |           |           |   |           |           |           |
|---|-----------|-----------|-----------|---|-----------|-----------|-----------|
| C | 1.481984  | 3.619023  | -3.172892 | C | -1.413394 | -1.201717 | 3.596858  |
| H | 2.137341  | 4.437809  | -3.493584 | H | -1.022281 | -0.740115 | 4.513685  |
| H | 1.046393  | 3.162841  | -4.069820 | H | -2.189291 | -0.540608 | 3.199984  |
| H | 0.667493  | 4.040718  | -2.577629 | H | -1.852743 | -2.176142 | 3.844769  |
| C | 3.374296  | 1.918648  | -3.195300 | C | -1.928127 | 3.015385  | -1.966633 |
| H | 3.907563  | 1.152945  | -2.623450 | H | -1.754927 | 3.006728  | -3.051671 |
| H | 2.955526  | 1.446518  | -4.092050 | H | -2.974991 | 2.719028  | -1.793882 |
| H | 4.105800  | 2.666485  | -3.524590 | H | -1.813193 | 4.055361  | -1.619879 |
| C | 1.668335  | 4.062560  | 3.544218  | C | -1.671392 | 4.312549  | 1.698753  |
| H | 0.852321  | 4.479065  | 2.951226  | H | -1.422980 | 5.359003  | 1.927436  |
| H | 1.264683  | 3.702471  | 4.498742  | H | -2.528322 | 4.320251  | 1.005279  |
| H | 2.388194  | 4.859157  | 3.768003  | H | -2.012034 | 3.842752  | 2.636720  |
| C | 3.484728  | 2.296163  | 3.597524  | C | 1.262258  | -2.034550 | 2.956049  |
| H | 4.272183  | 3.036190  | 3.782330  | C | 1.921855  | -0.949757 | 3.790260  |
| H | 3.119154  | 1.947477  | 4.571140  | C | 3.293344  | -1.398508 | 4.331588  |
| H | 3.942881  | 1.443481  | 3.084943  | C | 3.198775  | -2.211808 | 5.631547  |
| O | -0.543962 | 3.663803  | 1.170542  | C | 2.432395  | -3.536990 | 5.515447  |
| O | -1.031505 | 2.133804  | -1.337464 | C | 1.015125  | -3.406938 | 4.957842  |
| O | -0.428051 | -3.253486 | 0.117969  | H | 1.275654  | -0.634271 | 4.616814  |
| O | -0.373776 | -1.327846 | 2.657048  | H | 3.819413  | -1.966447 | 3.553492  |
| C | 0.362137  | -4.412074 | 0.090965  | H | 2.711856  | -1.587586 | 6.395864  |
| H | 1.146490  | -4.408741 | 0.859657  | H | 2.975382  | -4.237621 | 4.868281  |
| H | -0.271373 | -5.298070 | 0.248871  | H | 2.026147  | -0.096815 | 3.119297  |
| H | 0.850118  | -4.529130 | -0.891208 | H | 3.895140  | -0.503419 | 4.524127  |

|   |          |           |          |   |           |           |           |
|---|----------|-----------|----------|---|-----------|-----------|-----------|
| H | 4.210064 | -2.419077 | 6.003847 | O | 1.552072  | -2.098194 | 1.705919  |
| H | 2.368383 | -4.003812 | 6.507608 | O | 1.019950  | -3.242669 | 3.528062  |
| H | 0.455410 | -4.332546 | 5.113429 | O | -1.503763 | 0.935383  | 1.213835  |
| H | 0.458568 | -2.594718 | 5.441170 | O | 0.626860  | -0.370346 | -0.148889 |

---

**Table S21.** Cartesian coordinate of  $[\text{O}^{\text{Pr}}\text{AlOMe}_2]_2$  in state 2c

| Coordinates (Angstroms) |           |           |           | C  | -2.629219 | -1.918640 | -0.679904 |
|-------------------------|-----------|-----------|-----------|----|-----------|-----------|-----------|
| Atom                    | X         | Y         | Z         | C  | -2.513070 | -1.925478 | -2.088132 |
| Al                      | -0.225571 | 2.239826  | -0.080206 | C  | -3.214862 | -2.911401 | -2.791507 |
| N                       | -1.846088 | -0.950926 | 0.040468  | H  | -3.141618 | -2.943664 | -3.875062 |
| C                       | -2.260324 | 0.266617  | 0.333545  | C  | -4.005061 | -3.847344 | -2.126458 |
| C                       | -3.674937 | 0.725449  | 0.351190  | C  | -4.104688 | -3.812714 | -0.738340 |
| C                       | -4.676059 | 0.305520  | -0.537803 | H  | -4.723786 | -4.543512 | -0.225418 |
| H                       | -4.449838 | -0.383245 | -1.339474 | C  | -3.415977 | -2.853555 | 0.014349  |
| C                       | -5.976614 | 0.787414  | -0.403193 | Al | -0.087571 | -1.402723 | 0.667538  |
| H                       | -6.736032 | 0.459296  | -1.108645 | N  | 1.621418  | 1.638772  | -0.266660 |
| C                       | -6.325259 | 1.677054  | 0.620387  | C  | 1.916856  | 0.364717  | -0.413380 |
| C                       | -5.319351 | 2.088038  | 1.506871  | C  | 3.283064  | -0.228274 | -0.469289 |
| H                       | -5.563998 | 2.775511  | 2.313183  | C  | 4.422218  | 0.441487  | -0.946079 |
| C                       | -4.012482 | 1.635715  | 1.369044  | H  | 4.350163  | 1.450960  | -1.323241 |
| H                       | -3.239452 | 1.962046  | 2.054806  | C  | 5.664552  | -0.186078 | -0.937769 |
| C                       | -7.733159 | 2.205242  | 0.747694  | H  | 6.529860  | 0.352497  | -1.316235 |
| H                       | -7.838469 | 3.165521  | 0.225522  | C  | 5.822593  | -1.487437 | -0.444446 |
| H                       | -8.004123 | 2.374462  | 1.795362  | C  | 4.682008  | -2.155153 | 0.021184  |
| H                       | -8.462996 | 1.514583  | 0.312919  | H  | 4.772202  | -3.167827 | 0.406621  |

|   |           |           |           |   |           |           |           |
|---|-----------|-----------|-----------|---|-----------|-----------|-----------|
| C | 3.431321  | -1.548907 | -0.005370 | H | -5.326712 | -1.599330 | 1.587212  |
| H | 2.567568  | -2.105756 | 0.341797  | H | -5.657469 | -3.339486 | 1.670480  |
| C | 7.171777  | -2.162771 | -0.447962 | C | -1.677465 | -0.893680 | -2.843614 |
| H | 7.263315  | -2.879466 | 0.374931  | H | -1.306375 | -0.146303 | -2.140482 |
| H | 7.327532  | -2.717649 | -1.382773 | C | -2.515667 | -0.133212 | -3.887189 |
| H | 7.985457  | -1.435221 | -0.361025 | H | -1.907039 | 0.652846  | -4.347183 |
| C | 2.619039  | 2.679375  | -0.147433 | H | -2.875386 | -0.792981 | -4.685782 |
| C | 3.284968  | 2.868588  | 1.079371  | H | -3.386290 | 0.346057  | -3.425958 |
| C | 4.201054  | 3.922793  | 1.168188  | C | -0.441292 | -1.538959 | -3.494981 |
| H | 4.725350  | 4.089697  | 2.104840  | H | 0.144137  | -0.777762 | -4.023698 |
| C | 4.450141  | 4.760785  | 0.085712  | H | 0.206738  | -1.995138 | -2.741744 |
| C | 3.780201  | 4.553424  | -1.116056 | H | -0.727317 | -2.313535 | -4.217347 |
| H | 3.977963  | 5.207072  | -1.961036 | C | 2.158617  | 3.310650  | -2.603923 |
| C | 2.851837  | 3.515603  | -1.259928 | H | 1.484746  | 2.456017  | -2.524961 |
| H | 5.165124  | 5.574116  | 0.178806  | C | 3.056908  | 1.975287  | 2.292723  |
| H | -4.543426 | -4.603519 | -2.691984 | H | 2.338048  | 1.194788  | 2.030635  |
| C | -3.525384 | -2.840474 | 1.531571  | C | 1.284445  | 4.524328  | -2.965805 |
| H | -2.893099 | -2.038545 | 1.917671  | H | 1.888855  | 5.429156  | -3.104577 |
| C | -2.988799 | -4.153396 | 2.125498  | H | 0.740821  | 4.332963  | -3.898312 |
| H | -3.000903 | -4.103155 | 3.219581  | H | 0.548820  | 4.717225  | -2.180356 |
| H | -3.594531 | -5.013962 | 1.815377  | C | 3.171434  | 3.000900  | -3.722567 |
| H | -1.956369 | -4.314656 | 1.801843  | H | 3.757229  | 2.102538  | -3.496237 |
| C | -4.965739 | -2.551017 | 1.991859  | H | 2.646555  | 2.829054  | -4.669762 |
| H | -5.007273 | -2.496234 | 3.086361  | H | 3.873365  | 3.829199  | -3.876301 |

|   |           |           |           |   |           |           |           |
|---|-----------|-----------|-----------|---|-----------|-----------|-----------|
| C | 2.432670  | 2.773680  | 3.451053  | C | -0.965944 | 3.876211  | 2.071728  |
| H | 1.500049  | 3.242371  | 3.126324  | H | -0.532293 | 4.687491  | 2.673430  |
| H | 2.219381  | 2.109784  | 4.296967  | H | -1.969040 | 4.203101  | 1.751489  |
| H | 3.107883  | 3.562255  | 3.804691  | H | -1.092844 | 3.000599  | 2.728644  |
| C | 4.365016  | 1.283395  | 2.723292  | C | -0.376301 | -0.975405 | 3.380798  |
| H | 5.124089  | 2.016387  | 3.020640  | C | 0.452979  | -0.534440 | 4.602374  |
| H | 4.186102  | 0.627544  | 3.581286  | C | 1.933979  | -0.927253 | 4.533290  |
| H | 4.780385  | 0.679406  | 1.910123  | C | 2.224423  | -2.417952 | 4.740559  |
| O | -0.124072 | 3.601532  | 0.978571  | C | 1.445434  | -3.357831 | 3.810085  |
| O | -0.785171 | 2.378186  | -1.715560 | C | -0.066161 | -3.354571 | 4.056404  |
| O | 0.223132  | -3.092654 | 0.514917  | H | -0.011058 | -0.913788 | 5.520972  |
| O | -1.582984 | -0.214869 | 3.281586  | H | 2.315329  | -0.617942 | 3.557109  |
| C | 0.354186  | -3.921019 | -0.612787 | H | 1.993068  | -2.692165 | 5.781392  |
| H | 1.186485  | -3.603032 | -1.262319 | H | 1.627780  | -3.131601 | 2.754499  |
| H | 0.562627  | -4.949801 | -0.287592 | H | 0.372687  | 0.557496  | 4.623950  |
| H | -0.561447 | -3.940710 | -1.221892 | H | 2.483924  | -0.350728 | 5.288992  |
| C | -2.521330 | -0.363485 | 4.336477  | H | 3.301866  | -2.587760 | 4.611822  |
| H | -2.181080 | 0.123775  | 5.261600  | H | 1.795591  | -4.385390 | 3.980405  |
| H | -3.437226 | 0.127927  | 3.996529  | H | -0.504889 | -4.274292 | 3.662256  |
| H | -2.732533 | -1.419405 | 4.539697  | H | -0.263180 | -3.332977 | 5.141209  |
| C | -1.969091 | 2.999824  | -2.152282 | O | 0.324362  | -0.734727 | 2.232497  |
| H | -2.011542 | 2.979321  | -3.249841 | O | -0.823725 | -2.328176 | 3.416060  |
| H | -2.870985 | 2.488721  | -1.778088 | O | -1.381767 | 1.117264  | 0.747346  |
| H | -2.027190 | 4.054004  | -1.837374 | O | 0.929996  | -0.474998 | -0.499880 |

**Table S22.** Cartesian coordinate of [O<sup>Pr</sup>AlOMe<sub>2</sub>]<sub>2</sub> in state TS2c

| Coordinates (Angstroms) |           |           |           | C  | -3.752867 | -4.126052 | -0.760655 |
|-------------------------|-----------|-----------|-----------|----|-----------|-----------|-----------|
| Atom                    | X         | Y         | Z         | H  | -4.340162 | -4.920060 | -0.309059 |
| Al                      | -0.423249 | 2.166327  | 0.108043  | C  | -3.167034 | -3.154793 | 0.059552  |
| N                       | -1.781177 | -1.128852 | 0.256471  | Al | 0.040219  | -1.368872 | 0.902648  |
| C                       | -2.226632 | 0.087818  | 0.482455  | N  | 1.439826  | 1.681738  | -0.185499 |
| C                       | -3.593768 | 0.621114  | 0.254964  | C  | 1.799312  | 0.431941  | -0.403225 |
| C                       | -4.542734 | 0.068756  | -0.622995 | C  | 3.194037  | -0.066000 | -0.573119 |
| H                       | -4.313993 | -0.814209 | -1.200471 | C  | 4.239084  | 0.670731  | -1.152911 |
| C                       | -5.789839 | 0.668178  | -0.778113 | H  | 4.066843  | 1.668811  | -1.528350 |
| H                       | -6.501443 | 0.229505  | -1.473214 | C  | 5.515046  | 0.123839  | -1.256943 |
| C                       | -6.144060 | 1.819828  | -0.063981 | H  | 6.304521  | 0.710884  | -1.719836 |
| C                       | -5.202917 | 2.354055  | 0.826555  | C  | 5.801373  | -1.158412 | -0.772491 |
| H                       | -5.453406 | 3.240215  | 1.404610  | C  | 4.752236  | -1.894842 | -0.205954 |
| C                       | -3.950470 | 1.773250  | 0.980393  | H  | 4.941666  | -2.897647 | 0.169357  |
| H                       | -3.237634 | 2.200845  | 1.674938  | C  | 3.468480  | -1.369181 | -0.118607 |
| C                       | -7.484265 | 2.481519  | -0.267778 | H  | 2.678200  | -1.969819 | 0.316871  |
| H                       | -7.420369 | 3.256071  | -1.043548 | C  | 7.200032  | -1.720974 | -0.835849 |
| H                       | -7.835151 | 2.967790  | 0.648580  | H  | 7.755080  | -1.487461 | 0.082504  |
| H                       | -8.244588 | 1.761285  | -0.587139 | H  | 7.190025  | -2.811086 | -0.941256 |
| C                       | -2.432881 | -2.123209 | -0.554304 | H  | 7.765353  | -1.300651 | -1.674233 |
| C                       | -2.249714 | -2.069674 | -1.956234 | C  | 2.395461  | 2.766141  | -0.093849 |
| C                       | -2.845060 | -3.074639 | -2.728018 | C  | 3.130674  | 2.949927  | 1.094139  |
| H                       | -2.718451 | -3.053951 | -3.806758 | C  | 4.040949  | 4.012362  | 1.140198  |
| C                       | -3.594681 | -4.091665 | -2.142945 | H  | 4.624454  | 4.166755  | 2.043584  |



|   |           |           |           |   |           |           |           |
|---|-----------|-----------|-----------|---|-----------|-----------|-----------|
| C | 4.207459  | 4.872903  | 0.059697  | H | 0.455290  | -2.013616 | -2.581349 |
| C | 3.449926  | 4.687390  | -1.093186 | H | -0.431973 | -2.246801 | -4.103657 |
| H | 3.572979  | 5.367264  | -1.931765 | C | 1.720731  | 3.471390  | -2.478618 |
| C | 2.528902  | 3.638329  | -1.194917 | H | 1.083008  | 2.590720  | -2.381056 |
| H | 4.920392  | 5.691406  | 0.118123  | C | 2.966346  | 2.048371  | 2.309978  |
| H | -4.052844 | -4.857532 | -2.763275 | H | 2.199400  | 1.303347  | 2.099118  |
| C | -3.361156 | -3.205268 | 1.566887  | C | 0.782624  | 4.674501  | -2.685695 |
| H | -2.659654 | -2.496645 | 2.012592  | H | 1.348769  | 5.601333  | -2.839436 |
| C | -3.045126 | -4.598348 | 2.136413  | H | 0.148015  | 4.515124  | -3.565230 |
| H | -3.110576 | -4.589374 | 3.230255  | H | 0.133056  | 4.814247  | -1.816495 |
| H | -3.751574 | -5.355204 | 1.776865  | C | 2.623574  | 3.252835  | -3.706737 |
| H | -2.035046 | -4.911318 | 1.856191  | H | 3.252420  | 2.362975  | -3.588976 |
| C | -4.783026 | -2.753435 | 1.952076  | H | 2.010871  | 3.113484  | -4.605360 |
| H | -4.905286 | -2.752413 | 3.042278  | H | 3.284192  | 4.109783  | -3.884326 |
| H | -4.991571 | -1.743864 | 1.583010  | C | 2.475215  | 2.850354  | 3.528746  |
| H | -5.536145 | -3.429390 | 1.528602  | H | 1.559457  | 3.394475  | 3.283497  |
| C | -1.458561 | -0.964535 | -2.648645 | H | 2.248794  | 2.171273  | 4.357303  |
| H | -1.132300 | -0.236262 | -1.909267 | H | 3.226500  | 3.574467  | 3.868173  |
| C | -2.320215 | -0.189516 | -3.661615 | C | 4.269119  | 1.290883  | 2.629572  |
| H | -1.743770 | 0.650431  | -4.063360 | H | 5.078896  | 1.980615  | 2.898529  |
| H | -2.636678 | -0.820360 | -4.501363 | H | 4.115010  | 0.613423  | 3.477787  |
| H | -3.217004 | 0.222188  | -3.187237 | H | 4.602927  | 0.692624  | 1.776348  |
| C | -0.188955 | -1.523029 | -3.315666 | O | -0.425635 | 3.615536  | 1.037592  |
| H | 0.383251  | -0.705644 | -3.769862 | O | -1.138606 | 2.193174  | -1.471782 |

|   |           |           |           |   |           |           |           |
|---|-----------|-----------|-----------|---|-----------|-----------|-----------|
| O | 0.390099  | -3.063906 | 0.824663  | C | 1.455660  | -1.147439 | 4.454604  |
| O | -0.035404 | 0.662621  | 3.831450  | C | 2.005385  | -2.549928 | 4.152257  |
| C | 0.547092  | -3.925444 | -0.275037 | C | 1.157001  | -3.689818 | 4.731899  |
| H | 1.350382  | -3.588797 | -0.950975 | C | -0.259026 | -3.774574 | 4.150823  |
| H | 0.816075  | -4.929433 | 0.082894  | C | -1.084471 | -2.499790 | 4.328021  |
| H | -0.373736 | -4.016947 | -0.869292 | H | 1.096588  | -1.090474 | 5.489256  |
| C | -0.942721 | 0.774952  | 4.911166  | H | 2.096628  | -2.669966 | 3.066865  |
| H | -0.541202 | 0.364073  | 5.850128  | H | 1.092889  | -3.568628 | 5.824545  |
| H | -1.117462 | 1.844680  | 5.051546  | H | -0.209256 | -3.987948 | 3.077419  |
| H | -1.896626 | 0.281623  | 4.686517  | H | 2.251925  | -0.404055 | 4.359524  |
| C | -2.200772 | 2.982410  | -1.947369 | H | 3.018776  | -2.621932 | 4.567243  |
| H | -2.037702 | 3.225883  | -3.006788 | H | 1.669096  | -4.645187 | 4.557678  |
| H | -3.160651 | 2.450151  | -1.869855 | H | -0.800196 | -4.602313 | 4.630030  |
| H | -2.300377 | 3.932127  | -1.399294 | H | -2.147532 | -2.708431 | 4.181724  |
| C | -1.020313 | 3.867928  | 2.284008  | H | -0.973711 | -2.087332 | 5.339491  |
| H | -0.444022 | 4.631380  | 2.825941  | O | 0.896495  | -0.565588 | 2.219729  |
| H | -2.046896 | 4.255716  | 2.169276  | O | -0.783864 | -1.496252 | 3.347769  |
| H | -1.061236 | 2.967850  | 2.914983  | O | -1.362799 | 0.895512  | 1.039126  |
| C | 0.384086  | -0.649572 | 3.470886  | O | 0.868276  | -0.472167 | -0.456646 |

**Table S23.** Cartesian coordinate of  $[\text{O}^{\text{Pr}}\text{AlOMe}_2]_2$  in state 3c

| Coordinates (Angstroms) |           |           |           | C | -2.309617 | 0.302898  | 0.486940  |
|-------------------------|-----------|-----------|-----------|---|-----------|-----------|-----------|
| Atom                    | X         | Y         | Z         | C | -3.685218 | 0.873227  | 0.466306  |
| Al                      | -0.550790 | 2.309673  | -0.416870 | C | -4.833837 | 0.216288  | -0.014789 |
| N                       | -1.947026 | -0.957001 | 0.320541  | H | -4.776470 | -0.786233 | -0.408832 |

|    |           |           |           |   |           |           |           |
|----|-----------|-----------|-----------|---|-----------|-----------|-----------|
| C  | -6.071095 | 0.852246  | 0.003029  | H | 4.060160  | 1.756252  | 0.759703  |
| H  | -6.940104 | 0.322240  | -0.379191 | C | 5.374085  | 0.088276  | 0.560824  |
| C  | -6.219249 | 2.153070  | 0.500449  | H | 6.190977  | 0.608758  | 1.054478  |
| C  | -5.076155 | 2.802922  | 0.983101  | C | 5.558083  | -1.230077 | 0.126301  |
| H  | -5.158675 | 3.812728  | 1.377438  | C | 4.483536  | -1.867100 | -0.509223 |
| C  | -3.831987 | 2.184308  | 0.963419  | H | 4.598659  | -2.888676 | -0.863096 |
| H  | -2.963294 | 2.719561  | 1.328090  | C | 3.264681  | -1.223534 | -0.682699 |
| C  | -7.559777 | 2.844474  | 0.486134  | H | 2.441750  | -1.752558 | -1.149659 |
| H  | -7.658209 | 3.545744  | 1.321512  | C | 6.854974  | -1.959676 | 0.371941  |
| H  | -8.384320 | 2.126028  | 0.541411  | H | 7.694256  | -1.266096 | 0.486094  |
| H  | -7.688789 | 3.420705  | -0.439767 | H | 6.792176  | -2.554563 | 1.293205  |
| C  | -2.832282 | -2.029387 | -0.059539 | H | 7.088070  | -2.650884 | -0.445050 |
| C  | -3.015438 | -2.278025 | -1.437519 | C | 2.192909  | 3.029474  | 0.158721  |
| C  | -3.814743 | -3.366412 | -1.804056 | C | 2.252552  | 3.434995  | 1.508807  |
| H  | -3.967118 | -3.580565 | -2.858122 | C | 2.975463  | 4.595782  | 1.805447  |
| C  | -4.422273 | -4.170766 | -0.843432 | H | 3.030036  | 4.935266  | 2.835890  |
| C  | -4.227736 | -3.903221 | 0.508402  | C | 3.624007  | 5.322006  | 0.808712  |
| H  | -4.708874 | -4.533052 | 1.250266  | C | 3.561438  | 4.892113  | -0.513356 |
| C  | -3.417894 | -2.841804 | 0.932361  | H | 4.072733  | 5.457588  | -1.287570 |
| Al | -0.047959 | -1.345438 | 0.389692  | C | 2.840153  | 3.745324  | -0.867017 |
| N  | 1.343363  | 1.922714  | -0.187533 | H | 4.179155  | 6.220850  | 1.063796  |
| C  | 1.712600  | 0.672815  | -0.361763 | H | -5.047057 | -5.006193 | -1.148602 |
| C  | 3.075964  | 0.095545  | -0.225361 | C | -3.229680 | -2.568325 | 2.420221  |
| C  | 4.159596  | 0.746936  | 0.390046  | H | -2.367730 | -1.909016 | 2.545291  |

|   |           |           |           |   |           |           |           |
|---|-----------|-----------|-----------|---|-----------|-----------|-----------|
| C | -2.932724 | -3.849804 | 3.216928  | H | 2.035595  | 4.018355  | -4.242081 |
| H | -2.727933 | -3.596266 | 4.262066  | H | 1.082034  | 4.569765  | -2.850275 |
| H | -3.779730 | -4.545963 | 3.210297  | C | 4.184809  | 2.947521  | -2.854211 |
| H | -2.053684 | -4.364281 | 2.820246  | H | 4.651139  | 2.172005  | -2.236839 |
| C | -4.460687 | -1.845372 | 3.003004  | H | 4.120324  | 2.574888  | -3.883331 |
| H | -4.307484 | -1.632630 | 4.068131  | H | 4.846653  | 3.821676  | -2.856041 |
| H | -4.651545 | -0.897778 | 2.491544  | C | 0.472499  | 3.448980  | 3.312807  |
| H | -5.360245 | -2.466771 | 2.908009  | H | -0.264264 | 3.773549  | 2.573673  |
| C | -2.407390 | -1.390753 | -2.519936 | H | -0.029717 | 2.825696  | 4.062051  |
| H | -1.899506 | -0.549926 | -2.042616 | H | 0.873887  | 4.334984  | 3.821440  |
| C | -3.498755 | -0.789898 | -3.425661 | C | 2.639404  | 2.172500  | 3.660049  |
| H | -3.048648 | -0.116074 | -4.162553 | H | 3.180094  | 3.017273  | 4.102821  |
| H | -4.043558 | -1.566938 | -3.974845 | H | 2.145053  | 1.636104  | 4.476927  |
| H | -4.223522 | -0.212349 | -2.842127 | H | 3.373984  | 1.498260  | 3.205518  |
| C | -1.349894 | -2.154417 | -3.337916 | O | -0.860314 | 3.856473  | 0.285862  |
| H | -0.908046 | -1.491907 | -4.091464 | O | -1.076979 | 2.075556  | -2.041309 |
| H | -0.551314 | -2.517700 | -2.684528 | O | 0.226931  | -2.857670 | -0.395398 |
| H | -1.793551 | -3.010884 | -3.860637 | O | -0.486501 | -0.924834 | 3.706833  |
| C | 2.783737  | 3.304249  | -2.324014 | C | -0.300560 | -4.150861 | -0.253619 |
| H | 2.176806  | 2.397802  | -2.384789 | H | -0.914810 | -4.264606 | 0.649375  |
| C | 1.592100  | 2.640620  | 2.631818  | H | -0.934031 | -4.405777 | -1.114928 |
| H | 1.134495  | 1.740903  | 2.210902  | H | 0.516667  | -4.885866 | -0.200537 |
| C | 2.098283  | 4.364848  | -3.203851 | C | -0.833543 | -1.388489 | 5.001982  |
| H | 2.654040  | 5.309820  | -3.198711 | H | -0.153084 | -0.998352 | 5.772566  |

|   |           |           |           |   |           |           |           |
|---|-----------|-----------|-----------|---|-----------|-----------|-----------|
| H | -1.841783 | -1.016606 | 5.204450  | C | 1.039996  | -4.035728 | 2.920905  |
| H | -0.841315 | -2.483674 | 5.047660  | H | 1.802847  | -2.139977 | 4.803157  |
| C | -0.458701 | 1.572101  | -3.194838 | H | 3.168406  | -1.154422 | 2.246207  |
| H | 0.210797  | 0.726149  | -2.980135 | H | 3.676445  | -3.745591 | 3.794771  |
| H | -1.222361 | 1.218280  | -3.901151 | H | 2.124539  | -3.445656 | 1.157455  |
| H | 0.125213  | 2.349658  | -3.711318 | H | 1.886230  | -0.453899 | 4.310084  |
| C | -0.532762 | 5.140103  | -0.183284 | H | 4.024050  | -1.335462 | 3.770861  |
| H | -0.717148 | 5.252553  | -1.264014 | H | 4.393805  | -3.268645 | 2.258788  |
| H | -1.148521 | 5.889843  | 0.333591  | H | 2.669673  | -4.952194 | 1.890447  |
| H | 0.523379  | 5.383134  | 0.008352  | H | 0.439345  | -4.866222 | 2.539881  |
| C | 0.607282  | -1.579752 | 3.074097  | H | 1.268216  | -4.256846 | 3.975757  |
| C | 1.884496  | -1.478752 | 3.932090  | O | 0.780906  | -0.945348 | 1.884016  |
| C | 3.193099  | -1.732420 | 3.172864  | O | 0.147431  | -2.922383 | 2.841458  |
| C | 3.474861  | -3.205513 | 2.856792  | O | -1.343742 | 1.141726  | 0.720733  |
| C | 2.341744  | -3.927774 | 2.116027  | O | 0.763250  | -0.151611 | -0.719172 |

---

**Table S24.** Cartesian coordinate of [O<sup>Pr</sup>AlOMe<sub>2</sub>]<sub>2</sub> in state TS3c

| Coordinates (Angstroms) |           |           |           | C  | -4.012889 | -4.030271 | 0.621997  |
|-------------------------|-----------|-----------|-----------|----|-----------|-----------|-----------|
| Atom                    | X         | Y         | Z         | H  | -4.435105 | -4.730109 | 1.336580  |
| Al                      | -0.550655 | 2.288664  | -0.319023 | C  | -3.250864 | -2.949958 | 1.084155  |
| N                       | -1.892413 | -0.958009 | 0.555041  | Al | 0.010812  | -1.489552 | 0.634459  |
| C                       | -2.308407 | 0.294755  | 0.638666  | N  | 1.341494  | 1.943141  | -0.081382 |
| C                       | -3.719658 | 0.798235  | 0.548040  | C  | 1.699884  | 0.680519  | -0.206726 |
| C                       | -4.871259 | 0.008057  | 0.362951  | C  | 3.079250  | 0.123403  | -0.108481 |
| H                       | -4.803097 | -1.063383 | 0.268305  | C  | 4.144775  | 0.734724  | 0.572865  |
| C                       | -6.134075 | 0.589434  | 0.294004  | H  | 4.022494  | 1.705366  | 1.031096  |
| H                       | -6.999505 | -0.053165 | 0.150491  | C  | 5.369518  | 0.082156  | 0.692332  |
| C                       | -6.311079 | 1.973664  | 0.400699  | H  | 6.175434  | 0.567643  | 1.237414  |
| C                       | -5.169307 | 2.759784  | 0.595944  | C  | 5.579819  | -1.185498 | 0.134844  |
| H                       | -5.269325 | 3.838371  | 0.691100  | C  | 4.519203  | -1.781227 | -0.561550 |
| C                       | -3.902961 | 2.191608  | 0.670848  | H  | 4.656135  | -2.762450 | -1.009980 |
| H                       | -3.048304 | 2.840117  | 0.824831  | C  | 3.287887  | -1.146095 | -0.680581 |
| C                       | -7.678688 | 2.598612  | 0.280859  | H  | 2.465923  | -1.639574 | -1.189343 |
| H                       | -7.757587 | 3.509581  | 0.883757  | C  | 6.893852  | -1.906920 | 0.308352  |
| H                       | -8.466899 | 1.907431  | 0.597677  | H  | 7.714029  | -1.210085 | 0.509088  |
| H                       | -7.887898 | 2.878449  | -0.760282 | H  | 6.843786  | -2.607795 | 1.152563  |
| C                       | -2.737994 | -2.045739 | 0.128138  | H  | 7.150635  | -2.491215 | -0.581849 |
| C                       | -2.961483 | -2.218485 | -1.257293 | C  | 2.221295  | 3.041090  | 0.202691  |
| C                       | -3.719317 | -3.323214 | -1.661488 | C  | 2.239995  | 3.554387  | 1.518253  |
| H                       | -3.905596 | -3.475128 | -2.720886 | C  | 3.061440  | 4.656246  | 1.778440  |
| C                       | -4.242899 | -4.222396 | -0.737662 | H  | 3.099132  | 5.062028  | 2.785657  |

|   |           |           |           |   |           |           |           |
|---|-----------|-----------|-----------|---|-----------|-----------|-----------|
| C | 3.828382  | 5.241190  | 0.772653  | H | -0.591671 | -2.200556 | -2.806614 |
| C | 3.778090  | 4.730145  | -0.520587 | H | -1.961693 | -2.761433 | -3.801948 |
| H | 4.369561  | 5.194746  | -1.304827 | C | 2.927601  | 3.107762  | -2.264613 |
| C | 2.972990  | 3.627846  | -0.833837 | H | 2.264926  | 2.239916  | -2.292731 |
| H | 4.459553  | 6.097249  | 0.996541  | C | 1.430591  | 2.923792  | 2.646791  |
| H | -4.832439 | -5.070806 | -1.075572 | H | 0.806465  | 2.133432  | 2.227236  |
| C | -3.063679 | -2.731063 | 2.581994  | C | 2.329726  | 4.163269  | -3.212841 |
| H | -2.201190 | -2.077837 | 2.711557  | H | 2.952240  | 5.065160  | -3.249108 |
| C | -2.766802 | -4.038645 | 3.334100  | H | 2.254868  | 3.765292  | -4.231698 |
| H | -2.514183 | -3.823985 | 4.379301  | H | 1.326936  | 4.459782  | -2.886404 |
| H | -3.633461 | -4.709887 | 3.351220  | C | 4.312871  | 2.638096  | -2.745006 |
| H | -1.928951 | -4.575348 | 2.882214  | H | 4.720989  | 1.872170  | -2.077271 |
| C | -4.288450 | -2.028189 | 3.200359  | H | 4.241987  | 2.212970  | -3.753163 |
| H | -4.146800 | -1.893245 | 4.280630  | H | 5.027021  | 3.469316  | -2.783574 |
| H | -4.456080 | -1.043006 | 2.757316  | C | 0.490744  | 3.939382  | 3.317784  |
| H | -5.198088 | -2.624070 | 3.054078  | H | -0.194071 | 4.355680  | 2.574962  |
| C | -2.467910 | -1.230020 | -2.311061 | H | -0.102442 | 3.440097  | 4.093730  |
| H | -1.909208 | -0.433579 | -1.817998 | H | 1.044297  | 4.756888  | 3.796247  |
| C | -3.656593 | -0.564958 | -3.033095 | C | 2.356621  | 2.250082  | 3.676907  |
| H | -3.292779 | 0.211697  | -3.714535 | H | 3.036097  | 2.973821  | 4.143425  |
| H | -4.225395 | -1.293476 | -3.624180 | H | 1.756739  | 1.793601  | 4.474241  |
| H | -4.342640 | -0.093029 | -2.323286 | H | 2.962577  | 1.464155  | 3.212753  |
| C | -1.506267 | -1.889744 | -3.316147 | O | -0.847232 | 3.885923  | 0.292534  |
| H | -1.239418 | -1.174605 | -4.101916 | O | -1.061638 | 2.030658  | -1.947948 |

|   |           |           |           |   |           |           |           |
|---|-----------|-----------|-----------|---|-----------|-----------|-----------|
| O | 0.265668  | -2.678476 | -0.644433 | C | 1.829785  | -1.411954 | 3.950399  |
| O | -0.490958 | -0.614105 | 3.840061  | C | 3.037881  | -1.821001 | 3.089261  |
| C | -0.139219 | -4.008665 | -0.806706 | C | 3.165610  | -3.327624 | 2.807499  |
| H | -1.017038 | -4.276602 | -0.199450 | C | 2.145868  | -3.955652 | 1.845982  |
| H | -0.414196 | -4.193231 | -1.855532 | C | 0.677363  | -3.882107 | 2.281737  |
| H | 0.673341  | -4.710836 | -0.555138 | H | 1.519153  | -2.237604 | 4.596947  |
| C | -0.808911 | -1.316613 | 5.047597  | H | 3.022112  | -1.261601 | 2.151840  |
| H | -0.134094 | -1.036086 | 5.862979  | H | 3.137297  | -3.871454 | 3.764612  |
| H | -1.827573 | -1.016476 | 5.294934  | H | 2.227631  | -3.495702 | 0.853877  |
| H | -0.776991 | -2.395374 | 4.874700  | H | 2.106716  | -0.586092 | 4.621465  |
| C | -0.406608 | 1.522425  | -3.078425 | H | 3.945496  | -1.502960 | 3.615728  |
| H | 0.226520  | 0.653937  | -2.843233 | H | 4.168098  | -3.497861 | 2.392073  |
| H | -1.147957 | 1.198828  | -3.821990 | H | 2.409652  | -5.015938 | 1.722218  |
| H | 0.222126  | 2.286963  | -3.560976 | H | 0.097792  | -4.620944 | 1.715256  |
| C | -0.532383 | 5.096586  | -0.350461 | H | 0.594854  | -4.174944 | 3.342184  |
| H | -0.724773 | 5.060194  | -1.435364 | O | 0.762120  | -0.303870 | 2.070465  |
| H | -1.146840 | 5.908558  | 0.064761  | O | 0.097498  | -2.605102 | 2.132626  |
| H | 0.524720  | 5.368884  | -0.202963 | O | -1.411674 | 1.209865  | 0.843304  |
| C | 0.641481  | -0.882661 | 3.180519  | O | 0.756289  | -0.161597 | -0.475891 |

**Table S25.** Cartesian coordinate of  $[\text{O}^{\text{Pr}}\text{AlOMe}_2]_2$  in state 4c

|                         |           |           |           |   |           |           |          |
|-------------------------|-----------|-----------|-----------|---|-----------|-----------|----------|
| Coordinates (Angstroms) |           |           |           | C | -2.258714 | 0.207376  | 0.565097 |
| Atom                    | X         | Y         | Z         | C | -3.653623 | 0.709106  | 0.753008 |
| Al                      | -0.370808 | 2.123759  | -0.474937 | C | -4.753967 | -0.087314 | 1.117874 |
| N                       | -1.900924 | -1.048554 | 0.332132  | H | -4.640350 | -1.148501 | 1.277249 |



|    |           |           |           |   |           |           |           |
|----|-----------|-----------|-----------|---|-----------|-----------|-----------|
| C  | -6.015619 | 0.476582  | 1.277375  | H | 3.923682  | 1.403315  | 1.574654  |
| H  | -6.846287 | -0.162598 | 1.566616  | C | 5.441015  | 0.002786  | 0.996247  |
| C  | -6.236014 | 1.843876  | 1.066430  | H | 6.173269  | 0.414533  | 1.686384  |
| C  | -5.135309 | 2.637716  | 0.718757  | C | 5.788145  | -1.098130 | 0.198521  |
| H  | -5.271568 | 3.705063  | 0.562902  | C | 4.816982  | -1.625395 | -0.662157 |
| C  | -3.865030 | 2.090965  | 0.574567  | H | 5.060454  | -2.481307 | -1.286674 |
| H  | -3.033088 | 2.742770  | 0.328669  | C | 3.541059  | -1.073646 | -0.725327 |
| C  | -7.617082 | 2.438337  | 1.187298  | H | 2.795446  | -1.492886 | -1.393465 |
| H  | -8.126430 | 2.436313  | 0.214432  | C | 7.178490  | -1.681971 | 0.256008  |
| H  | -7.577864 | 3.477388  | 1.530958  | H | 7.197349  | -2.713855 | -0.109174 |
| H  | -8.241550 | 1.869017  | 1.883741  | H | 7.872799  | -1.100139 | -0.364705 |
| C  | -2.865257 | -2.073395 | -0.007238 | H | 7.573358  | -1.673423 | 1.277856  |
| C  | -3.475168 | -2.047391 | -1.281442 | C | 2.367234  | 2.953200  | 0.234009  |
| C  | -4.383757 | -3.066754 | -1.589332 | C | 2.331998  | 3.651404  | 1.459517  |
| H  | -4.871870 | -3.061146 | -2.559595 | C | 3.122064  | 4.800091  | 1.581391  |
| C  | -4.669591 | -4.086177 | -0.685750 | H | 3.106959  | 5.352995  | 2.516458  |
| C  | -4.034341 | -4.108146 | 0.551903  | C | 3.920974  | 5.245328  | 0.531877  |
| H  | -4.253359 | -4.907668 | 1.254063  | C | 3.942804  | 4.538198  | -0.666334 |
| C  | -3.119316 | -3.112437 | 0.914321  | H | 4.563589  | 4.890185  | -1.485588 |
| Al | -0.074037 | -1.663749 | 0.025554  | C | 3.168985  | 3.385172  | -0.843903 |
| N  | 1.475353  | 1.839203  | 0.044607  | H | 4.524907  | 6.141634  | 0.647167  |
| C  | 1.840030  | 0.580251  | -0.057783 | H | -5.380222 | -4.865230 | -0.948780 |
| C  | 3.209291  | 0.036211  | 0.067221  | C | -2.471415 | -3.160451 | 2.293811  |
| C  | 4.174613  | 0.571519  | 0.931966  | H | -1.721765 | -2.369864 | 2.339029  |

|   |           |           |           |   |           |           |           |
|---|-----------|-----------|-----------|---|-----------|-----------|-----------|
| C | -1.723689 | -4.484240 | 2.523304  | H | 2.567027  | 3.001324  | -4.246994 |
| H | -1.169686 | -4.447119 | 3.468739  | H | 1.500555  | 3.740184  | -3.038053 |
| H | -2.411325 | -5.336848 | 2.572108  | C | 4.627135  | 2.233227  | -2.571750 |
| H | -1.004758 | -4.663009 | 1.720766  | H | 5.069648  | 1.609627  | -1.787736 |
| C | -3.500652 | -2.908687 | 3.412328  | H | 4.608144  | 1.653494  | -3.502064 |
| H | -3.012553 | -2.938965 | 4.394585  | H | 5.283859  | 3.096179  | -2.732028 |
| H | -3.983598 | -1.931107 | 3.305844  | C | 0.379846  | 4.202317  | 2.977793  |
| H | -4.287019 | -3.672578 | 3.408431  | H | -0.276678 | 4.355473  | 2.117824  |
| C | -3.185778 | -0.974966 | -2.326867 | H | -0.223936 | 3.828258  | 3.814676  |
| H | -2.444030 | -0.277286 | -1.932904 | H | 0.803392  | 5.168634  | 3.280120  |
| C | -4.445917 | -0.153878 | -2.661289 | C | 2.353137  | 2.883622  | 3.871076  |
| H | -4.189138 | 0.653716  | -3.355955 | H | 2.858606  | 3.783743  | 4.241799  |
| H | -5.213575 | -0.776217 | -3.137355 | H | 1.722204  | 2.498939  | 4.681616  |
| H | -4.882391 | 0.294974  | -1.763886 | H | 3.107133  | 2.121922  | 3.654574  |
| C | -2.575610 | -1.599129 | -3.595976 | O | -0.820009 | 3.745233  | -0.061488 |
| H | -2.362558 | -0.816207 | -4.331946 | O | -0.681980 | 1.755075  | -2.128689 |
| H | -1.640076 | -2.110025 | -3.353716 | O | -0.100597 | -2.620769 | -1.418959 |
| H | -3.260898 | -2.317923 | -4.061042 | O | -0.058064 | 0.310151  | 3.086453  |
| C | 3.201013  | 2.666607  | -2.187809 | C | -0.456043 | -3.973332 | -1.571762 |
| H | 2.607897  | 1.753999  | -2.110366 | H | -0.051626 | -4.609274 | -0.767424 |
| C | 1.484474  | 3.185831  | 2.636011  | H | -1.547555 | -4.108095 | -1.587239 |
| H | 0.999906  | 2.251019  | 2.355289  | H | -0.057145 | -4.352998 | -2.523019 |
| C | 2.546230  | 3.526337  | -3.284626 | C | -1.310063 | 0.246435  | 3.772893  |
| H | 3.070837  | 4.481009  | -3.407915 | H | -1.200802 | 0.555742  | 4.818617  |

|   |           |           |           |   |           |           |           |
|---|-----------|-----------|-----------|---|-----------|-----------|-----------|
| H | -1.955237 | 0.953529  | 3.251559  | C | 1.604844  | -3.396681 | 1.293023  |
| H | -1.752612 | -0.751367 | 3.729026  | H | -0.015648 | -2.214639 | 4.025463  |
| C | -0.136212 | 0.909711  | -3.106247 | H | 2.898948  | -1.721712 | 4.763469  |
| H | -0.138159 | -0.145443 | -2.803793 | H | 1.453563  | -4.237314 | 3.766194  |
| H | -0.721346 | 0.998580  | -4.032299 | H | 3.100197  | -2.190044 | 2.262239  |
| H | 0.902291  | 1.181003  | -3.351343 | H | 0.380419  | -1.131035 | 5.353705  |
| C | -0.438488 | 4.913998  | -0.749390 | H | 1.925645  | -2.812274 | 5.745226  |
| H | 0.600909  | 5.196502  | -0.520448 | H | 3.139374  | -4.145736 | 4.231228  |
| H | -0.529165 | 4.804149  | -1.841672 | H | 3.537403  | -3.875460 | 2.008711  |
| H | -1.086008 | 5.748364  | -0.444631 | H | 2.049921  | -3.323290 | 0.288139  |
| C | 1.008838  | -0.446709 | 3.445955  | H | 1.208011  | -4.422321 | 1.381612  |
| C | 0.776295  | -1.574955 | 4.429583  | O | 2.084489  | -0.153439 | 2.971869  |
| C | 2.035842  | -2.396385 | 4.735363  | O | 0.535438  | -2.471795 | 1.444679  |
| C | 2.324949  | -3.565536 | 3.777736  | O | -1.338602 | 1.104953  | 0.665657  |
| C | 2.718649  | -3.213022 | 2.323460  | O | 0.903822  | -0.239277 | -0.430863 |

**Table S26.** Cartesian coordinate of  $[\text{O}^{\text{Pr}}\text{AlOMe}_2]_2$  in state  $\text{TS}_{\text{rb}}$

| Coordinates (Angstroms) |           |           |           | C | 3.736386 | 2.812839 | 1.849656  |
|-------------------------|-----------|-----------|-----------|---|----------|----------|-----------|
| Atom                    | X         | Y         | Z         | H | 4.159029 | 2.724063 | 2.847730  |
| Al                      | -0.767763 | 1.285789  | 0.252698  | C | 3.831307 | 4.032934 | 1.165679  |
| N                       | 2.240543  | -0.510906 | -0.814887 | C | 3.246413 | 4.127505 | -0.104370 |
| C                       | 1.758554  | 0.698199  | -0.606254 | H | 3.289890 | 5.069563 | -0.645511 |
| C                       | 2.542338  | 1.813995  | 0.000330  | C | 2.589547 | 3.040133 | -0.674176 |
| C                       | 3.109730  | 1.711761  | 1.273464  | H | 2.108027 | 3.133476 | -1.642305 |
| H                       | 3.022885  | 0.783543  | 1.820294  | C | 4.557635 | 5.207820 | 1.774735  |

|    |           |           |           |   |           |           |           |
|----|-----------|-----------|-----------|---|-----------|-----------|-----------|
| H  | 4.486657  | 5.200971  | 2.867679  | C | -5.676266 | -4.514989 | -3.563472 |
| H  | 4.155842  | 6.160178  | 1.412975  | H | -5.163377 | -5.435904 | -3.861754 |
| H  | 5.624899  | 5.184260  | 1.517214  | H | -6.525575 | -4.786802 | -2.927607 |
| C  | 3.689749  | -0.664380 | -0.715383 | H | -6.084109 | -4.061110 | -4.476489 |
| C  | 4.267440  | -1.309287 | 0.394399  | C | -3.554134 | 1.048331  | -0.622091 |
| C  | 5.659365  | -1.442721 | 0.431033  | C | -3.951444 | 1.494560  | -1.900207 |
| H  | 6.123302  | -1.938883 | 1.278665  | C | -5.198686 | 2.114601  | -2.028198 |
| C  | 6.458132  | -0.962815 | -0.601776 | H | -5.520462 | 2.464132  | -3.005148 |
| C  | 5.866020  | -0.346016 | -1.698597 | C | -6.027244 | 2.305639  | -0.925416 |
| H  | 6.490838  | 0.008789  | -2.512975 | C | -5.598999 | 1.901891  | 0.336038  |
| C  | 4.478445  | -0.186446 | -1.783022 | H | -6.234458 | 2.077629  | 1.200312  |
| Al | 1.269122  | -2.001984 | -1.689374 | C | -4.357895 | 1.280317  | 0.513452  |
| N  | -2.289159 | 0.393570  | -0.450561 | H | -6.995482 | 2.784587  | -1.046356 |
| C  | -1.995692 | -0.831571 | -0.928110 | H | 7.538123  | -1.076798 | -0.555818 |
| C  | -2.995394 | -1.723179 | -1.602979 | C | 3.878908  | 0.425450  | -3.046753 |
| C  | -2.519277 | -2.596157 | -2.595545 | H | 2.822627  | 0.643436  | -2.869252 |
| H  | -1.470317 | -2.561618 | -2.872342 | C | 3.931373  | -0.592953 | -4.202759 |
| C  | -3.385322 | -3.488215 | -3.220593 | H | 3.452565  | -0.179253 | -5.098850 |
| H  | -3.000892 | -4.145000 | -3.997807 | H | 4.970682  | -0.838419 | -4.453464 |
| C  | -4.738782 | -3.561881 | -2.862126 | H | 3.418639  | -1.515874 | -3.921869 |
| C  | -5.198703 | -2.708511 | -1.851247 | C | 4.549404  | 1.753870  | -3.438816 |
| H  | -6.240750 | -2.755070 | -1.543211 | H | 4.018698  | 2.205985  | -4.285227 |
| C  | -4.347509 | -1.793210 | -1.234889 | H | 4.540935  | 2.465227  | -2.606361 |
| H  | -4.740960 | -1.141979 | -0.465172 | H | 5.590506  | 1.608248  | -3.748777 |

|   |           |           |           |   |           |           |           |
|---|-----------|-----------|-----------|---|-----------|-----------|-----------|
| C | 3.425628  | -1.909708 | 1.512444  | H | -1.618295 | 2.686941  | -4.160661 |
| H | 2.414513  | -1.505184 | 1.420974  | H | -3.104698 | 3.510313  | -3.640188 |
| C | 3.941104  | -1.569149 | 2.923395  | C | -3.706185 | 0.837806  | -4.357732 |
| H | 3.226954  | -1.920690 | 3.678275  | H | -4.483311 | 1.512224  | -4.736273 |
| H | 4.899685  | -2.057142 | 3.132922  | H | -2.968830 | 0.705604  | -5.158325 |
| H | 4.083826  | -0.492939 | 3.066735  | H | -4.166672 | -0.135190 | -4.154153 |
| C | 3.343061  | -3.440142 | 1.339531  | O | -1.262342 | 2.942196  | 0.351613  |
| H | 2.679078  | -3.880274 | 2.095173  | O | -0.144123 | 0.611982  | 1.747325  |
| H | 2.982788  | -3.695292 | 0.340277  | O | 2.716512  | -2.957223 | -1.943110 |
| H | 4.336010  | -3.889513 | 1.462064  | O | 0.558702  | -1.704232 | -3.236187 |
| C | -3.901655 | 0.893284  | 1.915037  | C | 2.784433  | -4.136803 | -2.695947 |
| H | -2.909547 | 0.443320  | 1.835622  | H | 2.509891  | -3.972527 | -3.751013 |
| C | -3.020857 | 1.392319  | -3.099907 | H | 3.811773  | -4.530490 | -2.677332 |
| H | -2.217960 | 0.699289  | -2.852068 | H | 2.122223  | -4.927874 | -2.301503 |
| C | -3.754124 | 2.140688  | 2.804899  | C | 0.080169  | -0.549734 | -3.871417 |
| H | -4.719112 | 2.635731  | 2.966741  | H | -0.916923 | -0.732624 | -4.302165 |
| H | -3.347800 | 1.866277  | 3.786327  | H | -0.000799 | 0.308012  | -3.191206 |
| H | -3.074413 | 2.856026  | 2.331515  | H | 0.748368  | -0.263636 | -4.698758 |
| C | -4.825250 | -0.157542 | 2.555496  | C | -0.082125 | 1.304065  | 2.970148  |
| H | -4.883167 | -1.062989 | 1.939527  | H | -0.359464 | 0.635137  | 3.802026  |
| H | -4.452680 | -0.444686 | 3.546753  | H | 0.938053  | 1.671465  | 3.166144  |
| H | -5.844844 | 0.225287  | 2.680981  | H | -0.758632 | 2.170186  | 3.009160  |
| C | -2.357435 | 2.760176  | -3.353132 | C | -0.503530 | 4.083511  | 0.655230  |
| H | -1.854600 | 3.114224  | -2.446145 | H | -1.161521 | 4.873831  | 1.045173  |

|   |           |           |           |   |           |           |           |
|---|-----------|-----------|-----------|---|-----------|-----------|-----------|
| H | 0.276269  | 3.897052  | 1.412344  | H | -1.904435 | -1.481602 | 1.738866  |
| H | 0.003934  | 4.481469  | -0.237084 | H | -0.833772 | -5.437459 | 0.028169  |
| C | 0.011799  | -3.564593 | 0.416994  | H | -2.979762 | -5.122923 | 1.028578  |
| C | -0.885292 | -4.697038 | 0.828487  | H | -3.630531 | -3.190777 | 2.418569  |
| C | -2.345832 | -4.229229 | 1.040975  | H | -1.992255 | -1.717594 | 3.472881  |
| C | -2.572445 | -3.471370 | 2.355644  | H | 0.301968  | -1.560064 | 2.930466  |
| C | -1.717529 | -2.209501 | 2.531348  | H | 0.059486  | -3.313012 | 3.197206  |
| C | -0.215469 | -2.449697 | 2.578546  | O | 0.440588  | -3.489736 | -0.745209 |
| H | -0.498091 | -5.153568 | 1.748707  | O | 0.364726  | -2.625384 | 1.255469  |
| H | -2.652126 | -3.616652 | 0.187261  | O | 0.560127  | 1.016522  | -0.976464 |
| H | -2.381110 | -4.152470 | 3.198521  | O | -0.822057 | -1.261928 | -0.774883 |

**Table S27.** Cartesian coordinate of  $[\text{O}^{\text{Pr}}\text{AlOMe}_2]_2$  in state 1d

| Coordinates (Angstroms) |           |           |           | H | 2.168740 | 4.794367  | -1.128262 |
|-------------------------|-----------|-----------|-----------|---|----------|-----------|-----------|
| Atom                    | X         | Y         | Z         | C | 1.880861 | 2.686871  | -0.852281 |
| Al                      | -0.899979 | 0.832704  | 0.586250  | H | 1.230879 | 2.582040  | -1.714555 |
| N                       | 2.350124  | -0.791792 | -0.822136 | C | 3.781543 | 5.440306  | 0.979339  |
| C                       | 1.608825  | 0.254992  | -0.501006 | H | 4.031646 | 5.505157  | 2.043238  |
| C                       | 2.188158  | 1.561393  | -0.076525 | H | 3.078600 | 6.247066  | 0.744732  |
| C                       | 2.976514  | 1.707887  | 1.067612  | H | 4.701650 | 5.635587  | 0.412795  |
| H                       | 3.185211  | 0.848293  | 1.691051  | C | 3.798910 | -0.688960 | -0.788326 |
| C                       | 3.468011  | 2.963593  | 1.417205  | C | 4.496103 | -1.218185 | 0.316599  |
| H                       | 4.069051  | 3.068702  | 2.317062  | C | 5.892360 | -1.143762 | 0.312838  |
| C                       | 3.207418  | 4.089792  | 0.625512  | H | 6.450456 | -1.546987 | 1.152662  |
| C                       | 2.404633  | 3.930058  | -0.512486 | C | 6.579205 | -0.565936 | -0.751407 |

|    |           |           |           |   |           |           |           |
|----|-----------|-----------|-----------|---|-----------|-----------|-----------|
| C  | 5.871912  | -0.058765 | -1.836068 | C | -5.621278 | 2.886958  | -1.225204 |
| H  | 6.413130  | 0.377920  | -2.670364 | C | -5.560319 | 2.366815  | 0.065074  |
| C  | 4.473748  | -0.111848 | -1.881162 | H | -6.305059 | 2.664679  | 0.798405  |
| Al | 1.555592  | -2.337487 | -1.676257 | C | -4.548022 | 1.474801  | 0.434412  |
| N  | -2.535831 | 0.210918  | -0.133399 | H | -6.414255 | 3.578688  | -1.498272 |
| C  | -2.517080 | -1.107201 | -0.452010 | H | 7.664869  | -0.516628 | -0.737068 |
| C  | -3.471209 | -1.710886 | -1.439272 | C | 3.744179  | 0.389387  | -3.122005 |
| C  | -2.900284 | -2.533896 | -2.423917 | H | 2.672431  | 0.418885  | -2.907561 |
| H  | -1.823498 | -2.680506 | -2.428860 | C | 3.947008  | -0.601387 | -4.285665 |
| C  | -3.703206 | -3.111718 | -3.403178 | H | 3.364922  | -0.291079 | -5.161799 |
| H  | -3.244341 | -3.728641 | -4.173056 | H | 5.003509  | -0.643058 | -4.577271 |
| C  | -5.091502 | -2.913332 | -3.414873 | H | 3.639310  | -1.609651 | -3.992033 |
| C  | -5.652631 | -2.115180 | -2.410357 | C | 4.158275  | 1.816425  | -3.519937 |
| H  | -6.728573 | -1.956371 | -2.391370 | H | 3.547434  | 2.162745  | -4.362110 |
| C  | -4.856249 | -1.508241 | -1.439492 | H | 4.023117  | 2.514259  | -2.687440 |
| H  | -5.317916 | -0.878556 | -0.687692 | H | 5.206591  | 1.861468  | -3.836508 |
| C  | -5.950912 | -3.518356 | -4.499735 | C | 3.765060  | -1.894972 | 1.469413  |
| H  | -5.569676 | -4.495851 | -4.815614 | H | 2.720067  | -1.580281 | 1.429731  |
| H  | -6.986815 | -3.647884 | -4.168371 | C | 4.309735  | -1.509831 | 2.855971  |
| H  | -5.970763 | -2.875501 | -5.390008 | H | 3.664675  | -1.925776 | 3.639362  |
| C  | -3.585327 | 1.106555  | -0.529569 | H | 5.318197  | -1.904638 | 3.023609  |
| C  | -3.624283 | 1.638062  | -1.833981 | H | 4.353092  | -0.423893 | 2.994822  |
| C  | -4.655240 | 2.526417  | -2.160079 | C | 3.793237  | -3.426537 | 1.290835  |
| H  | -4.696043 | 2.949353  | -3.160156 | H | 3.185429  | -3.916510 | 2.062965  |

|   |           |           |           |   |           |           |           |
|---|-----------|-----------|-----------|---|-----------|-----------|-----------|
| H | 3.423282  | -3.714529 | 0.303307  | O | 2.975882  | -3.234122 | -2.089560 |
| H | 4.819712  | -3.802167 | 1.381201  | O | 0.388331  | -2.028789 | -2.896348 |
| C | -4.460033 | 0.968337  | 1.868739  | C | 3.036983  | -4.484994 | -2.727884 |
| H | -3.727973 | 0.155396  | 1.888308  | H | 2.542958  | -4.476284 | -3.712419 |
| C | -2.548719 | 1.311311  | -2.859815 | H | 4.087654  | -4.766277 | -2.884514 |
| H | -1.951195 | 0.485120  | -2.470829 | H | 2.566941  | -5.281019 | -2.126312 |
| C | -3.927108 | 2.089640  | 2.781296  | C | 0.192059  | -0.947165 | -3.766413 |
| H | -4.641814 | 2.920130  | 2.834660  | H | -0.802737 | -1.025883 | -4.223732 |
| H | -3.755423 | 1.720850  | 3.800401  | H | 0.237119  | 0.019596  | -3.243518 |
| H | -2.987294 | 2.484589  | 2.383541  | H | 0.936356  | -0.933550 | -4.578131 |
| C | -5.788435 | 0.399053  | 2.392736  | C | -0.193528 | 0.986947  | 3.321493  |
| H | -6.158010 | -0.405837 | 1.746524  | H | -0.264548 | 0.288451  | 4.171894  |
| H | -5.655262 | -0.009039 | 3.402075  | H | 0.757297  | 1.535444  | 3.423420  |
| H | -6.568970 | 1.166539  | 2.450606  | H | -1.007474 | 1.717929  | 3.437741  |
| C | -1.600233 | 2.514560  | -3.027425 | C | -0.535172 | 3.620691  | 1.207534  |
| H | -1.193990 | 2.814298  | -2.055523 | H | -1.204294 | 3.956969  | 2.016843  |
| H | -0.770995 | 2.260321  | -3.700926 | H | 0.438525  | 3.377675  | 1.660002  |
| H | -2.129585 | 3.375323  | -3.454783 | H | -0.373958 | 4.477602  | 0.537363  |
| C | -3.136659 | 0.849838  | -4.203034 | C | 0.260770  | -3.584283 | 0.632778  |
| H | -3.729706 | 1.637936  | -4.681848 | C | -0.538444 | -4.784714 | 1.061359  |
| H | -2.331901 | 0.581040  | -4.897072 | C | -1.961781 | -4.478443 | 1.576724  |
| H | -3.778135 | -0.027189 | -4.066616 | C | -1.994872 | -3.867329 | 2.982088  |
| O | -1.097841 | 2.553435  | 0.498801  | C | -1.242237 | -2.538331 | 3.114777  |
| O | -0.248241 | 0.277256  | 2.112235  | C | 0.257085  | -2.624985 | 2.872406  |



|   |           |           |          |   |           |           |           |
|---|-----------|-----------|----------|---|-----------|-----------|-----------|
| H | 0.037610  | -5.301464 | 1.843515 | H | -1.363834 | -2.155010 | 4.136584  |
| H | -2.450164 | -3.815080 | 0.859239 | H | 0.752170  | -1.717384 | 3.207805  |
| H | -1.580433 | -4.591687 | 3.700743 | H | 0.714918  | -3.498582 | 3.354047  |
| H | -1.637361 | -1.781111 | 2.435337 | O | 0.663122  | -3.510107 | -0.546481 |
| H | -0.581027 | -5.441506 | 0.190711 | O | 0.634118  | -2.654980 | 1.460178  |
| H | -2.508457 | -5.428669 | 1.585167 | O | 0.332442  | 0.184189  | -0.641131 |
| H | -3.041498 | -3.711713 | 3.271042 | O | -1.614148 | -1.825188 | 0.024433  |

**Table S28.** Cartesian coordinate of [O<sup>Pr</sup>AlOMe<sub>2</sub>]<sub>2</sub> in state TS1d

| Coordinates (Angstroms) |           |           |           | H  | 4.122482  | 6.584096  | -0.049068 |
|-------------------------|-----------|-----------|-----------|----|-----------|-----------|-----------|
| Atom                    | X         | Y         | Z         | H  | 2.835911  | 6.740274  | 1.152570  |
| Al                      | -0.832287 | 0.540067  | 0.921575  | H  | 2.481353  | 7.040231  | -0.551117 |
| N                       | 2.353469  | -0.247769 | -0.655932 | C  | 3.771860  | -0.379340 | -0.567909 |
| C                       | 1.615246  | 0.820363  | -0.478413 | C  | 4.309729  | -0.861220 | 0.646759  |
| C                       | 2.016041  | 2.219098  | -0.284413 | C  | 5.695419  | -1.042421 | 0.708494  |
| C                       | 3.322733  | 2.599711  | 0.076602  | H  | 6.147761  | -1.401711 | 1.627268  |
| H                       | 4.079402  | 1.853006  | 0.272402  | C  | 6.507856  | -0.781123 | -0.394889 |
| C                       | 3.650731  | 3.944358  | 0.199368  | C  | 5.945985  | -0.330181 | -1.585541 |
| H                       | 4.662511  | 4.219039  | 0.486402  | H  | 6.584729  | -0.139475 | -2.443338 |
| C                       | 2.701906  | 4.949891  | -0.038114 | C  | 4.566094  | -0.116691 | -1.699524 |
| C                       | 1.405900  | 4.563807  | -0.405727 | Al | 0.956135  | -1.358905 | -1.410562 |
| H                       | 0.651838  | 5.322868  | -0.595615 | N  | -2.504850 | 0.219930  | 0.133338  |
| C                       | 1.059968  | 3.223860  | -0.523702 | C  | -3.056850 | -1.032781 | 0.206685  |
| H                       | 0.047222  | 2.952852  | -0.784318 | C  | -4.109579 | -1.453347 | -0.791736 |
| C                       | 3.057228  | 6.405638  | 0.130382  | C  | -3.823872 | -2.602865 | -1.542492 |

|   |           |           |            |           |           |           |
|---|-----------|-----------|------------|-----------|-----------|-----------|
| H | -2.871488 | -3.096357 | -1.392057C | 4.055722  | -0.728361 | -4.089377 |
| C | -4.725588 | -3.081502 | -2.487734H | 3.595259  | -0.383633 | -5.021977 |
| H | -4.473861 | -3.965586 | -3.070382H | 5.097798  | -0.999013 | -4.299669 |
| C | -5.953326 | -2.440169 | -2.703555H | 3.520164  | -1.627709 | -3.768364 |
| C | -6.239819 | -1.302613 | -1.940992C | 4.612672  | 1.683974  | -3.484824 |
| H | -7.186682 | -0.786874 | -2.085179H | 4.112667  | 2.044353  | -4.391033 |
| C | -5.330620 | -0.804833 | -1.006172H | 4.527448  | 2.460148  | -2.716176 |
| H | -5.579000 | 0.093402  | -0.455428H | 5.675662  | 1.555639  | -3.721232 |
| C | -6.917016 | -2.941439 | -3.753090C | 3.410689  | -1.140440 | 1.848773  |
| H | -6.895128 | -4.034420 | -3.829695H | 2.412899  | -1.396848 | 1.481291  |
| H | -7.945909 | -2.637588 | -3.532615C | 3.241358  | 0.118128  | 2.722705  |
| H | -6.663535 | -2.541677 | -4.744199H | 2.592084  | -0.102992 | 3.575966  |
| C | -3.200382 | 1.319076  | -0.490147H | 4.212246  | 0.463545  | 3.100652  |
| C | -3.074844 | 1.579442  | -1.872824H | 2.774817  | 0.935392  | 2.169713  |
| C | -3.791075 | 2.654417  | -2.416962C | 3.904257  | -2.312102 | 2.713342  |
| H | -3.709706 | 2.858249  | -3.481268H | 3.146213  | -2.553167 | 3.466983  |
| C | -4.608943 | 3.455145  | -1.628327H | 4.094111  | -3.212023 | 2.117161  |
| C | -4.709761 | 3.199508  | -0.263340H | 4.827295  | -2.069023 | 3.253193  |
| H | -5.344113 | 3.830247  | 0.353921C  | -4.151442 | 1.913652  | 1.831540  |
| C | -4.008375 | 2.145039  | 0.330006H  | -3.449969 | 1.127707  | 2.118201  |
| H | -5.163187 | 4.277935  | -2.073408C | -2.207169 | 0.735665  | -2.797449 |
| H | 7.581459  | -0.935454 | -0.325295H | -1.740169 | -0.049322 | -2.199422 |
| C | 3.966619  | 0.369043  | -3.013669C | -3.774936 | 3.173086  | 2.630864  |
| H | 2.902995  | 0.565363  | -2.864897H | -4.489417 | 3.988766  | 2.464974  |

|   |           |           |            |           |           |           |
|---|-----------|-----------|------------|-----------|-----------|-----------|
| H | -3.770492 | 2.952896  | 3.705653H  | 0.125171  | -1.275126 | -4.998121 |
| H | -2.779421 | 3.514198  | 2.338329H  | 1.050625  | -2.639636 | -4.332947 |
| C | -5.564176 | 1.423911  | 2.201558C  | -0.188936 | -1.241890 | 3.056525  |
| H | -5.798661 | 0.469095  | 1.718667H  | -1.082820 | -1.855727 | 2.890320  |
| H | -5.646959 | 1.278919  | 3.285630H  | 0.648345  | -1.912458 | 3.302728  |
| H | -6.328502 | 2.151114  | 1.900767H  | -0.364127 | -0.600108 | 3.937263  |
| C | -1.083748 | 1.577206  | -3.429858C | -0.058358 | 2.653656  | 2.579430  |
| H | -0.473659 | 2.058784  | -2.662062H | -0.701259 | 3.141951  | 3.327228  |
| H | -0.419215 | 0.940376  | -4.018661H | 0.498746  | 1.850729  | 3.085552  |
| H | -1.493641 | 2.359935  | -4.079914H | 0.673662  | 3.399794  | 2.232290  |
| C | -3.042634 | 0.051137  | -3.896160C | 0.173915  | -3.375628 | -0.230708 |
| H | -3.480157 | 0.790455  | -4.578518C | -0.439284 | -4.650344 | -0.764302 |
| H | -2.405847 | -0.613749 | -4.491462C | -1.635651 | -5.096080 | 0.109813  |
| H | -3.856869 | -0.540818 | -3.472518C | -1.215095 | -5.919212 | 1.335286  |
| O | -0.833284 | 2.179173  | 1.505167C  | -0.343502 | -5.154302 | 2.340195  |
| O | 0.135732  | -0.488821 | 1.920615C  | 0.938352  | -4.574398 | 1.748723  |
| O | 1.637999  | -3.110244 | -1.291190H | 0.313791  | -5.443604 | -0.826804 |
| O | 0.816840  | -0.983808 | -3.087273H | -2.203559 | -4.213557 | 0.427343  |
| C | 2.901786  | -3.647026 | -0.954999H | -0.671269 | -6.815279 | 0.999041  |
| H | 3.683919  | -3.126261 | -1.517590H | -0.907660 | -4.323681 | 2.780469  |
| H | 3.107858  | -3.522373 | 0.114340H  | -0.755557 | -4.421883 | -1.784062 |
| H | 2.931870  | -4.714359 | -1.210255H | -2.304480 | -5.702023 | -0.512731 |
| C | 0.326262  | -1.848679 | -4.082736H | -2.114508 | -6.277853 | 1.850520  |
| H | -0.617334 | -2.336179 | -3.788146H | -0.059920 | -5.825823 | 3.161723  |

|   |           |           |            |           |           |           |
|---|-----------|-----------|------------|-----------|-----------|-----------|
| H | 1.619493  | -4.249708 | 2.5372250  | 0.685765  | -3.358336 | 1.010835  |
| H | 1.469220  | -5.300115 | 1.1204810  | 0.325718  | 0.518717  | -0.620970 |
| O | -0.381314 | -2.249395 | -0.5943130 | -2.638237 | -1.872486 | 1.012747  |

---
